# Supplementary material for: Scalable solution for delivery of diabetes self-management education in Thailand (DSME-T): a cluster randomised trial study protocol
Source: PubMed Central journal article supplement (PMC7537447; doi:10.1136/bmjopen-2020-036963), 2020-10-05
Supplement: bmjopen-2020-036963.draft_revisions.pdf [file bmjopen-2020-036963.draft_revisions.pdf]

# BMJ Open

BMJ Open is committed to open peer review. As part of this commitment we make the peer review history of every article we publish publicly available.

When an article is published we post the peer reviewers' comments and the authors' responses online. We also post the versions of the paper that were used during peer review. These are the versions that the peer review comments apply to.

The versions of the paper that follow are the versions that were submitted during the peer review process. They are not the versions of record or the final published versions. They should not be cited or distributed as the published version of this manuscript.

BMJ Open is an open access journal and the full, final, typeset and author-corrected version of record of the manuscript is available on our site with no access controls, subscription charges or pay-per-view fees (<http://bmjopen.bmj.com>).

If you have any questions on BMJ Open's open peer review process please email [info.bmjopen@bmj.com](mailto:info.bmjopen@bmj.com)

# BMJ Open

## A Scalable Solution for Delivery of Diabetes Self-Management Education in Thailand: A Cluster Randomized Trial

|                               |                                                                                                                                                                                                                                                                                                                                                                                                                                                                                                                                                                                                                                                                                                                                                                                                                                                                                                                                                                                                                                                                                                                                                                                                                                                                                     |
|-------------------------------|-------------------------------------------------------------------------------------------------------------------------------------------------------------------------------------------------------------------------------------------------------------------------------------------------------------------------------------------------------------------------------------------------------------------------------------------------------------------------------------------------------------------------------------------------------------------------------------------------------------------------------------------------------------------------------------------------------------------------------------------------------------------------------------------------------------------------------------------------------------------------------------------------------------------------------------------------------------------------------------------------------------------------------------------------------------------------------------------------------------------------------------------------------------------------------------------------------------------------------------------------------------------------------------|
| Journal:                      | <i>BMJ Open</i>                                                                                                                                                                                                                                                                                                                                                                                                                                                                                                                                                                                                                                                                                                                                                                                                                                                                                                                                                                                                                                                                                                                                                                                                                                                                     |
| Manuscript ID                 | bmjopen-2020-036963                                                                                                                                                                                                                                                                                                                                                                                                                                                                                                                                                                                                                                                                                                                                                                                                                                                                                                                                                                                                                                                                                                                                                                                                                                                                 |
| Article Type:                 | Protocol                                                                                                                                                                                                                                                                                                                                                                                                                                                                                                                                                                                                                                                                                                                                                                                                                                                                                                                                                                                                                                                                                                                                                                                                                                                                            |
| Date Submitted by the Author: | 13-Jan-2020                                                                                                                                                                                                                                                                                                                                                                                                                                                                                                                                                                                                                                                                                                                                                                                                                                                                                                                                                                                                                                                                                                                                                                                                                                                                         |
| Complete List of Authors:     | <p>Angkurawaranon, Chaisiri; Chiang Mai University, Department of Family Medicine, Faculty of Medicine<br/> Papachristou Nadal, Iliatha; London School of Hygiene and Tropical Medicine, Faculty of Epidemiology and Population Health<br/> Mallinson, Poppy; London School of Hygiene and Tropical Medicine Faculty of Epidemiology and Population Health, Department of Non-communicable Disease Epidemiology<br/> Pinyopornpanish, Kanokporn; Chiang Mai University, Department of Family Medicine, Faculty of Medicine<br/> Quansri, Orawan; Mahidol University<br/> Rerkasem, Kittipan ; Chiang Mai University, Department of Surgery, Faculty of Medicine, Chiang Mai University; Chiang Mai University, Research Institute for Health Sciences<br/> Srivanichakorn, Supattra; Royal Thai Government Ministry of Public Health<br/> Techakehakij, Win; Lampang Hospital<br/> Wichit, Nutchath; Surat Thani Rajabhat University<br/> Pateekhum, Chanapat; Chiang Mai University<br/> Hashmi, Ahmar; Chiang Mai University, Department of Family Medicine<br/> Hanson, Kara; London School of Hygiene and Tropical Medicine<br/> Khunti, Kamlesh; University of Leicester, Department of Health Sciences<br/> Kinra, Sanjay; London School of Hygiene and Tropical Medicine</p> |
| Keywords:                     | DIABETES & ENDOCRINOLOGY, EDUCATION & TRAINING (see Medical Education & Training), Protocols & guidelines < HEALTH SERVICES ADMINISTRATION & MANAGEMENT                                                                                                                                                                                                                                                                                                                                                                                                                                                                                                                                                                                                                                                                                                                                                                                                                                                                                                                                                                                                                                                                                                                             |
|                               |                                                                                                                                                                                                                                                                                                                                                                                                                                                                                                                                                                                                                                                                                                                                                                                                                                                                                                                                                                                                                                                                                                                                                                                                                                                                                     |

SCHOLARONE™  
Manuscripts

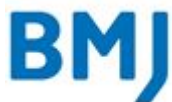

I, the Submitting Author has the right to grant and does grant on behalf of all authors of the Work (as defined in the below author licence), an exclusive licence and/or a non-exclusive licence for contributions from authors who are: i) UK Crown employees; ii) where BMJ has agreed a CC-BY licence shall apply, and/or iii) in accordance with the terms applicable for US Federal Government officers or employees acting as part of their official duties; on a worldwide, perpetual, irrevocable, royalty-free basis to BMJ Publishing Group Ltd ("BMJ") its licensees and where the relevant Journal is co-owned by BMJ to the co-owners of the Journal, to publish the Work in this journal and any other BMJ products and to exploit all rights, as set out in our [licence](#).

The Submitting Author accepts and understands that any supply made under these terms is made by BMJ to the Submitting Author unless you are acting as an employee on behalf of your employer or a postgraduate student of an affiliated institution which is paying any applicable article publishing charge ("APC") for Open Access articles. Where the Submitting Author wishes to make the Work available on an Open Access basis (and intends to pay the relevant APC), the terms of reuse of such Open Access shall be governed by a Creative Commons licence – details of these licences and which [Creative Commons](#) licence will apply to this Work are set out in our licence referred to above.

Other than as permitted in any relevant BMJ Author's Self Archiving Policies, I confirm this Work has not been accepted for publication elsewhere, is not being considered for publication elsewhere and does not duplicate material already published. I confirm all authors consent to publication of this Work and authorise the granting of this licence.

1  
2  
3 **A Scalable Solution for Delivery of Diabetes Self-Management Education in Thailand: A**  
4  
5 **Cluster Randomized Trial**  
6

7 Chaisiri Angkurawaranon<sup>1\*</sup>, Iliatha Papachristou Nadal<sup>2,11</sup>, Poppy Mallinson<sup>2</sup>, Kanokporn  
8 Pinyopornpanish<sup>1</sup>, Orawan Quansri<sup>3</sup>, Kittipan Rerkasem<sup>4,5</sup>, Supattra Srivanichakorn<sup>6</sup>, Win  
9 Techakehakij<sup>7</sup>, Nutchath Wichit<sup>8</sup>, Chanapat Pateekhum<sup>1</sup>, Ahmar Hashmi<sup>1</sup>, Kara Hanson<sup>9</sup>,  
10 Kamlesh Khunti<sup>10</sup>, Sanjay Kinra<sup>2</sup>  
11  
12  
13  
14  
15

16  
17 **Author affiliations**  
18

19 <sup>1</sup> Department of Family Medicine, Faculty of Medicine, Chiang Mai University  
20

21 <sup>2</sup> Faculty of Epidemiology and Population Health, London School of Hygiene and Tropical  
22  
23  
24  
25  
26  
27  
28  
29  
30  
31  
32  
33  
34  
35  
36  
37  
38  
39  
40  
41  
42  
43  
44  
45  
46  
47  
48  
49  
50  
51  
52  
53  
54  
55  
56  
57  
58  
59  
60

22 <sup>2</sup> Faculty of Epidemiology and Population Health, London School of Hygiene and Tropical  
23  
24  
25  
26  
27  
28  
29  
30  
31  
32  
33  
34  
35  
36  
37  
38  
39  
40  
41  
42  
43  
44  
45  
46  
47  
48  
49  
50  
51  
52  
53  
54  
55  
56  
57  
58  
59  
60

23  
24  
25  
26  
27  
28  
29  
30  
31  
32  
33  
34  
35  
36  
37  
38  
39  
40  
41  
42  
43  
44  
45  
46  
47  
48  
49  
50  
51  
52  
53  
54  
55  
56  
57  
58  
59  
60

24  
25  
26  
27  
28  
29  
30  
31  
32  
33  
34  
35  
36  
37  
38  
39  
40  
41  
42  
43  
44  
45  
46  
47  
48  
49  
50  
51  
52  
53  
54  
55  
56  
57  
58  
59  
60

25  
26  
27  
28  
29  
30  
31  
32  
33  
34  
35  
36  
37  
38  
39  
40  
41  
42  
43  
44  
45  
46  
47  
48  
49  
50  
51  
52  
53  
54  
55  
56  
57  
58  
59  
60

26  
27  
28  
29  
30  
31  
32  
33  
34  
35  
36  
37  
38  
39  
40  
41  
42  
43  
44  
45  
46  
47  
48  
49  
50  
51  
52  
53  
54  
55  
56  
57  
58  
59  
60

27  
28  
29  
30  
31  
32  
33  
34  
35  
36  
37  
38  
39  
40  
41  
42  
43  
44  
45  
46  
47  
48  
49  
50  
51  
52  
53  
54  
55  
56  
57  
58  
59  
60

28  
29  
30  
31  
32  
33  
34  
35  
36  
37  
38  
39  
40  
41  
42  
43  
44  
45  
46  
47  
48  
49  
50  
51  
52  
53  
54  
55  
56  
57  
58  
59  
60

29  
30  
31  
32  
33  
34  
35  
36  
37  
38  
39  
40  
41  
42  
43  
44  
45  
46  
47  
48  
49  
50  
51  
52  
53  
54  
55  
56  
57  
58  
59  
60

30  
31  
32  
33  
34  
35  
36  
37  
38  
39  
40  
41  
42  
43  
44  
45  
46  
47  
48  
49  
50  
51  
52  
53  
54  
55  
56  
57  
58  
59  
60

31  
32  
33  
34  
35  
36  
37  
38  
39  
40  
41  
42  
43  
44  
45  
46  
47  
48  
49  
50  
51  
52  
53  
54  
55  
56  
57  
58  
59  
60

32  
33  
34  
35  
36  
37  
38  
39  
40  
41  
42  
43  
44  
45  
46  
47  
48  
49  
50  
51  
52  
53  
54  
55  
56  
57  
58  
59  
60

33  
34  
35  
36  
37  
38  
39  
40  
41  
42  
43  
44  
45  
46  
47  
48  
49  
50  
51  
52  
53  
54  
55  
56  
57  
58  
59  
60

34  
35  
36  
37  
38  
39  
40  
41  
42  
43  
44  
45  
46  
47  
48  
49  
50  
51  
52  
53  
54  
55  
56  
57  
58  
59  
60

35  
36  
37  
38  
39  
40  
41  
42  
43  
44  
45  
46  
47  
48  
49  
50  
51  
52  
53  
54  
55  
56  
57  
58  
59  
60

36  
37  
38  
39  
40  
41  
42  
43  
44  
45  
46  
47  
48  
49  
50  
51  
52  
53  
54  
55  
56  
57  
58  
59  
60

37  
38  
39  
40  
41  
42  
43  
44  
45  
46  
47  
48  
49  
50  
51  
52  
53  
54  
55  
56  
57  
58  
59  
60

38  
39  
40  
41  
42  
43  
44  
45  
46  
47  
48  
49  
50  
51  
52  
53  
54  
55  
56  
57  
58  
59  
60

39  
40  
41  
42  
43  
44  
45  
46  
47  
48  
49  
50  
51  
52  
53  
54  
55  
56  
57  
58  
59  
60

40  
41  
42  
43  
44  
45  
46  
47  
48  
49  
50  
51  
52  
53  
54  
55  
56  
57  
58  
59  
60

41  
42  
43  
44  
45  
46  
47  
48  
49  
50  
51  
52  
53  
54  
55  
56  
57  
58  
59  
60

42  
43  
44  
45  
46  
47  
48  
49  
50  
51  
52  
53  
54  
55  
56  
57  
58  
59  
60

43  
44  
45  
46  
47  
48  
49  
50  
51  
52  
53  
54  
55  
56  
57  
58  
59  
60

44  
45  
46  
47  
48  
49  
50  
51  
52  
53  
54  
55  
56  
57  
58  
59  
60

45  
46  
47  
48  
49  
50  
51  
52  
53  
54  
55  
56  
57  
58  
59  
60

46  
47  
48  
49  
50  
51  
52  
53  
54  
55  
56  
57  
58  
59  
60

47  
48  
49  
50  
51  
52  
53  
54  
55  
56  
57  
58  
59  
60

48  
49  
50  
51  
52  
53  
54  
55  
56  
57  
58  
59  
60

49  
50  
51  
52  
53  
54  
55  
56  
57  
58  
59  
60

50  
51  
52  
53  
54  
55  
56  
57  
58  
59  
60

51  
52  
53  
54  
55  
56  
57  
58  
59  
60

52  
53  
54  
55  
56  
57  
58  
59  
60

53  
54  
55  
56  
57  
58  
59  
60

54  
55  
56  
57  
58  
59  
60

55  
56  
57  
58  
59  
60

56  
57  
58  
59  
60

57  
58  
59  
60

58  
59  
60

59  
60

Corresponding author: Chaisiri Angkurawaranon, Department of Family Medicine, Faculty of  
Medicine, Chiang Mai University, email: [chaisiri.a@cmu.ac.th](mailto:chaisiri.a@cmu.ac.th)

1  
2  
3  
4  
5  
6  
7  
8  
9  
10  
11  
12  
13  
14  
15  
16  
17  
18  
19  
20  
21  
22  
23  
24  
25  
26  
27  
28  
29  
30  
31  
32  
33  
34  
35  
36  
37  
38  
39  
40  
41  
42  
43  
44  
45  
46  
47  
48  
49  
50  
51  
52  
53  
54  
55  
56  
57  
58  
59  
60

For peer review only

## 1 **ABSTRACT**

2 **Introduction** Type 2 diabetes mellitus is amongst the foremost health challenges facing policy  
3 makers in Thailand as its prevalence has more than tripled over the last two decades, accounting  
4 for considerable death, disability and healthcare expenditure. Diabetes Self-Management  
5 Education (DSME) programmes shows promise in improving diabetes outcomes, but this is not  
6 routinely utilised in Thailand. This study aims to test a culturally tailored DMSE model in  
7 Thailand, using a 3-arm cluster randomised controlled trial comparing a nurse-led model, a peer-  
8 assisted model, and standard care. We will test which model is effective and cost effective to  
9 improve cardiovascular risk and control of blood glucose among people with diabetes.

10  
11 **Methods and analysis** 21 primary care units in northern Thailand will be randomised to one of  
12 three interventions, enrolling a total of 693 patients. The primary care units will be randomised  
13 (1:1:1) to participate in a culturally-tailored DSME intervention for 12 months. The 3-arm trial  
14 design will compare effectiveness of nurse-led, peer-assisted (Thai village health volunteers) and  
15 standard care. The primary trial outcome is glycaemic control. A process evaluation and cost  
16 effectiveness evaluation will be conducted to produce policy relevant guidance for the Thai  
17 Ministry of Public Health. The planned trial period will start in January 2020 and finish October  
18 2021.

19  
20 **Ethics and dissemination** Ethical approval was submitted in Thailand and the UK. We will  
21 share our study data with other researchers, advertising via our publications and web presence. In  
22 particular, we are committed to sharing our findings and data with academic audiences in  
23 Thailand and other low- and middle-income countries.

1  
2  
3 24 **Trial registration number:**  
4

5 25 ClinicalTrials.gov ID NCT03938233  
6  
7

8 26 **Strengths and limitation of this study**  
9

- 10 27 • A three-arm cluster randomized control trial to evaluate clinical and cost-effectiveness of  
11  
12 28 a culturally tailored DSME under two alternative modes of delivery (nurse-led and peer-  
13  
14 29 assisted) will provide policy makers with options for scalability.  
15  
16  
17 30 • A culturally-tailored DSME programme has been developed with input from stakeholders  
18  
19 31 (policy makers, clinicians, nurses, village health volunteers and people with diabetes).  
20  
21  
22 32 • A series of short films has been developed to introduce key topics, as there is increasing  
23  
24 33 recognition that films are a highly efficient medium for communicating information,  
25  
26 34 particularly in low literacy settings  
27  
28  
29  
30  
31  
32  
33  
34  
35  
36  
37

## 38 INTRODUCTION

39 Type 2 diabetes mellitus (hereto referred to as diabetes) is amongst the  
40 foremost health challenges facing policy makers in Thailand. Its prevalence has more than tripled  
41 over the last two decades to an estimated 4 million adults (age adjusted prevalence 7.1%) living  
42 with diabetes in 2015.<sup>1,2</sup> Diabetes is associated with several macrovascular (e.g. ischaemic heart  
43 disease) and microvascular complications (e.g. nephropathy, retinopathy, neuropathy, and foot  
44 disease), which primarily account for the considerable death and disability (of which diabetes is  
45 the 5<sup>th</sup> leading cause in Thailand). In addition, diabetes in Thailand causes two-fold increase in  
46 healthcare expenditure and significant loss of economic productivity—of both diabetic patients  
47 and their carers.<sup>1-4</sup>

48 The complications of diabetes can be largely prevented or delayed through lifestyle change  
49 and medication when necessary, and regular screening for early detection and management of  
50 complications to control risk factors such as blood glucose, lipids and blood pressure.<sup>3,4</sup> Under  
51 Thailand's universal health coverage, nearly everyone diagnosed with  
52 diabetes receives timely medical care (>97%) and has access to screening. Yet, surveys suggest  
53 that only about half of the people with diabetes achieve optimal control of risk factors or receive  
54 annual screening for microvascular complications (53-60%).<sup>1,5</sup> Limited data support a lack  
55 of engagement and self-management skills among those diagnosed with diabetes as the main  
56 underlying reasons for this.<sup>6</sup>

57 Successful management of diabetes involves a considerable degree of self-management. People  
58 with diabetes need to adhere to multiple behaviours, including healthy  
59 lifestyles, regular monitoring and medication, problem-solving and healthy coping. In this, they  
60 are greatly supported by diabetes self-management education (DSME), defined as 'a  
61 collaborative and ongoing process intended to facilitate the development of knowledge, skills,



1  
2  
3 62 and abilities that are required for successful self-management of diabetes'.<sup>7</sup> Evidence from over  
4  
5 63 100 studies, including many randomised controlled trials, conducted predominantly in high-  
6  
7 64 income countries, suggests that DSME programs are associated with improvements in a range of  
8  
9 65 behavioural (knowledge, behaviours, self-efficacy, psychosocial) and clinical (physiological risk  
10  
11 66 factors, screening for complications, quality of life) outcomes,<sup>8,9</sup> and are also cost-  
12  
13 67 effective.<sup>10</sup> Therefore, DSME programs are recommended by most clinical guidelines.<sup>7</sup>  
14  
15 68 However, there is considerable heterogeneity in the effectiveness of DSME programmes<sup>8,9</sup>.  
16  
17 69 Programmes that are more effective usually offer more than 10 hours of contact between trainers  
18  
19 70 and patients, incorporate behavioural approaches and provide longer-term support mechanisms.  
20  
21 71 However, providing intensive and sustained support has cost implications, resulting in ongoing  
22  
23 72 efforts to identify more cost-efficient ways to deliver DSME, notably through use of lay health  
24  
25 73 workers or peer educators, such as Thai village health volunteers (VHV).  
26  
27 74 Peers can support sustained changes in complex health behaviours by providing assistance in  
28  
29 75 daily management, social and emotional support, linkage to clinical care, and ongoing  
30  
31 76 availability of support.<sup>11,12</sup> Unlike the educational/psychological framework of professional  
32  
33 77 support, peer support operates on a social support framework. Although traditionally restricted to  
34  
35 78 those with experience of disease, the definition of peers has been expanded to include other non-  
36  
37 79 professionals with a close relationship with the community (e.g. VHV).<sup>13</sup> However, despite  
38  
39 80 widespread interest, empirical data on effectiveness of peers in supporting behaviour change in  
40  
41 81 chronic diseases, including diabetes, is limited and inconsistent.<sup>11,12</sup> In an earlier review, the  
42  
43 82 World Health Organisation did not find sufficient evidence to recommend peer  
44  
45 83 support programs as a policy option for diabetes management in LMICs.<sup>14</sup> Whereas many studies  
46  
47 84 on the effectiveness of DSME programmes come from high-income countries (HIC), there is a  
48  
49  
50  
51  
52  
53  
54  
55  
56  
57  
58  
59  
60

1  
2  
3 85 dearth of data from LMIC settings on cost-effectiveness, acceptability and potential adverse  
4  
5 86 consequences of peer support programmes, as well as optimal strategies for mobilising and  
6  
7 87 integrating peers in diabetes care pathways<sup>12,17-18</sup>.

8 88 In the Thai healthcare system, structured DSME is not routinely available. While several small-  
9  
10 89 scale studies from Thailand have demonstrated that DSME can strengthen self-management of  
11  
12 90 diabetes, negative perceptions of educational programs and concerns about the burden on  
13  
14 91 existing staff time and costs, have so far prevented the introduction of DSME.<sup>1,18</sup> However,  
15  
16 92 recent policy developments in Thailand are supportive of DSME introduction, if a scalable  
17  
18 93 model can be found. We therefore hypothesise that a nurse-led and/or peer-assisted model for  
19  
20 94 DSME delivery will be effective in improving blood glucose among people with diabetes, with  
21  
22 95 the peer-assisted model being the more scalable option for the Thai healthcare system. We  
23  
24 96 propose to evaluate this through a 3-arm cluster randomised controlled trial.  
25  
26  
27  
28  
29  
30  
31  
32

## 33 98 **METHODS AND ANALYSIS**

### 34 35 99 **Study design**

36  
37 100 This study is an MRC complex intervention<sup>19</sup> 3-arm cluster randomised controlled trial. Primary  
38  
39 101 care units will be randomised for patients to receiving either the nurse-led or peer-assisted  
40  
41 102 DSME intervention or standard care (brief education session by a nurse). Assessments will be  
42  
43 103 undertaken at baseline, 6- and 12-month follow up. A process and cost-effective evaluation will  
44  
45 104 also be conducted.  
46  
47  
48  
49  
50

### 51 106 **Randomisation**

52  
53  
54  
55  
56  
57  
58  
59  
60

1  
2  
3 107 Twenty-one primary care units will be randomised to provide one of three interventions: (1)  
4  
5 108 nurse-led DSME; (2) nurse-led DSME with peer assistance (provided by Thai village health  
6  
7 109 volunteers, VHVs); or (3) standard care (brief education session by a nurse), resulting in seven  
8  
9  
10 110 primary care units in each arm of the study. All primary care units follow protocols for diabetes  
11  
12 111 management as outlined by national guidelines. Randomisation will minimise any variation in  
13  
14  
15 112 practice between the different primary care units.  
16  
17 113

### 19 114 **Sample size calculation**

21 115 The intervention is powered to detect a clinically important difference of 0.6 units HbA1c (SD  
22  
23 116 1.5 units) between the control and intervention arms. Therefore, 693 participants are needed from  
24  
25  
26 117 21 primary care units (7 in each trial arm arm) to achieve 80% power at 5% significance level,  
27  
28 118 assuming an intra-cluster correlation coefficient (ICC) between primary care units of 0.02 and  
29  
30  
31 119 loss to follow-up rate of 20%<sup>20,21</sup>.  
32

### 35 121 **Participant Selection**

37 122 693 patients requiring a DSME intervention will be recruited from 21 primary care units in  
38  
39 123 Chiang Mai and Lampang provinces in northern Thailand. While diabetes is diagnosed at tertiary  
40  
41  
42 124 hospitals, it is managed at the primary care unit health centres, which are served by a full-time  
43  
44  
45 125 nurse (doctor visits weekly), and 10-15 village health volunteers (VHV) linking patients in the  
46  
47 126 community.  
48

49 127 We will recruit all new referrals for diabetes management and patients with uncontrolled  
50  
51 128 diabetes diagnosed in the past 3 years at the 21 primary care units over a 9-month period  
52  
53  
54  
55  
56  
57  
58  
59

1  
2  
3 129 (N=693). Posters and information sheets will be used to provide necessary, trial-related  
4  
5 130 information to prospective participants.  
6  
7

8 131

9  
10 132 Participants presenting to one of the 21 primary care units will be included if they are:  
11

- 12 133 1. Over 18 years of age with a new referral for type 2 diabetes management;  
13  
14 134 2. Over 18 years of age with uncontrolled in diabetes (HbA1c>7 mg/dl) within the first  
15  
16 135 three years of diagnosis;  
17  
18 136 2. Willing and able to attend educational group meetings; and  
19  
20 137 3. Available for six and 12-month follow-up visits  
21  
22

23  
24 138 Participants will be excluded if they:  
25

- 26 139 1. Have advanced diabetic complications such as diabetic nephropathy, diabetic  
27  
28 140 retinopathy, or amputations; or if they are pregnant;  
29  
30 141 2. Have learning disabilities, dementia or active severe mental illness; or  
31  
32 142 3. Lack the capacity to give voluntary, informed consent.  
33  
34

35 143

### 36 37 144 **Informed consent**

38  
39 145 Written informed consent will be obtained from all study participants in Thai before any study  
40  
41 146 procedures are undertaken including enrolment, intervention allocation, follow-up interviews and  
42  
43 147 blood draws. Local research assistants will explain the study to patients using the patient  
44  
45 148 information sheet. The right of the patient to refuse to participate without giving reasons will be  
46  
47 149 respected.  
48  
49

50  
51 150  
52  
53  
54  
55  
56  
57  
58  
59  
60

151

Figure 1: Trial flow diagram

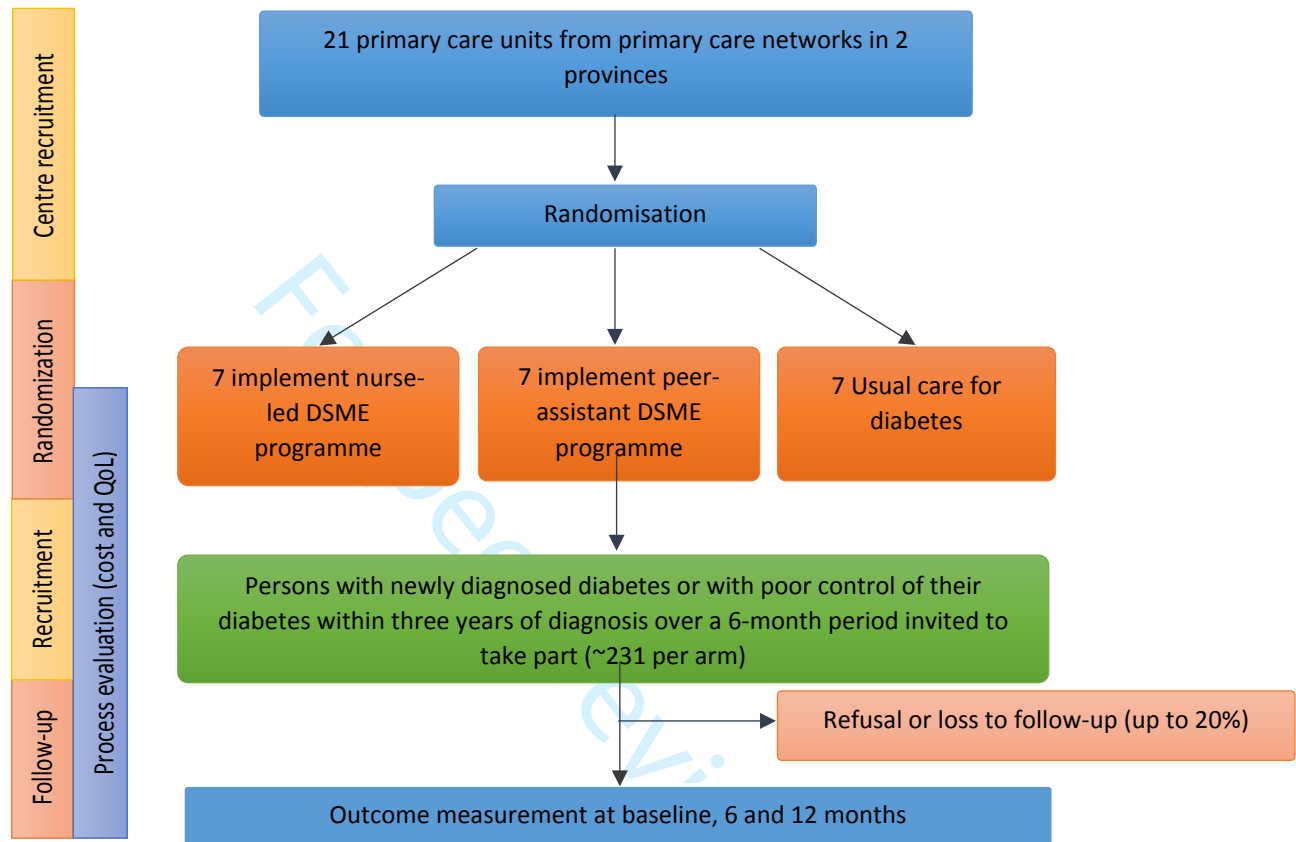

152

153

### 154 Intervention description and delivery

155 The DSME programme has been developed using a structured process. This included a desk and  
 156 literature review and focus groups with local nurses and village health volunteers to develop a  
 157 paper prototype of the intervention, including a hypothesised pathway of action (e.g. common-  
 158 sense model of illness, empowerment, discovery learning, social learning, and social support)  
 159 and a training manual for nurses and VHVs. In addition, seven brief films (5-6 minutes long)  
 160 have been developed and have been used to trigger discussions on key topic areas during DSME  
 161 intervention meetings covering such topics as medical adherence, dietary recommendation,

1  
2  
3 162 physical activity and stress management. Films will be used in the intervention as they are  
4  
5 163 increasingly recognised as a highly effective medium for improved recall when communicating  
6  
7 164 large amounts of information, particularly in low literacy settings<sup>22</sup>. Films will be in the local  
8  
9 165 language and use local people.  
10  
11  
12  
13

14  
15 167 The nurses and VHVs in the intervention arms will be trained to deliver the DSME programme  
16  
17 168 (at the community hospital or neighbourhoods as appropriate). The intervention will be piloted at  
18  
19 169 four community hospitals with four nurses and four VHVs who will be trained to deliver the  
20  
21 170 DSME programme to groups of 5-10 persons with diabetes. This will allow for refining the  
22  
23 171 intervention, ensuring data collection can be completed as specified, and to check our  
24  
25 172 assumptions and processes for the trial.  
26  
27  
28  
29

30  
31 174 A process evaluation at the end of the study will aim to assess intervention delivery (fidelity,  
32  
33 175 dose and reach), clarify causal mechanisms (those hypothesised by theory of change developed  
34  
35 176 within the project or identify unexpected ones), and identify contextual factors (barriers,  
36  
37 177 facilitators) associated with variation in outcomes.<sup>23</sup> The process evaluation will consist of one-  
38  
39 178 to-one interviews with clinicians and policy makers and direct observations of patients. Data for  
40  
41 179 economic evaluation (resource usage and quality of life using EQ-5D<sup>24</sup>) will be obtained  
42  
43 180 prospectively alongside the trial.  
44  
45  
46

## 47 181

### 48 182 **Standard care**

49  
50  
51 183 Patients in the control group will receive standard care in the form a brief didactic educational  
52  
53 184 session at the time of diagnosis of diabetes<sup>25</sup>.  
54  
55  
56  
57  
58  
59  
60

1  
2  
3 **185 Study outcomes**  
4

5 **186** The primary trial outcome of the intervention is a difference in trial arms at one-year follow-up  
6  
7  
8 **187** in HbA1c. There is a growing recognition of the importance of combining tight glycaemic  
9  
10 **188** control with reduction in other cardiovascular risk factors for prevention of or reduction  
11  
12 **189** in complications.<sup>4</sup>  
13

14 **190** The cardiovascular risk will be estimated by the Thai cardiovascular risk score model, which  
15  
16 **191** estimates the risk of dying from any cardiovascular disease over 10 years based on age, gender,  
17  
18 **192** smoking habits, total cholesterol and systolic blood pressure, as it has been calibrated for use in a  
19  
20 **193** Thai population.<sup>26</sup> Additional measures include biophysical data, psychosocial and lifestyle data  
21  
22 **194** and intervention related data, as described in Table 1.  
23  
24  
25

26 **195**  
27

28 **196 Table 1:** Primary and Secondary Outcome measures  
29  
30

| <b>Target domain</b>                  | <b>Measures or questionnaires</b>                                                                                                                                                                                                                                                                                                                                 |
|---------------------------------------|-------------------------------------------------------------------------------------------------------------------------------------------------------------------------------------------------------------------------------------------------------------------------------------------------------------------------------------------------------------------|
| <b>Cardiovascular risk assessment</b> | <p data-bbox="540 1150 1419 1255">Haemoglobin A1c levels (HbA1c): HbA1c will measure the average blood glucose (sugar) levels months</p> <p data-bbox="540 1367 699 1402">Blood lipids</p> <p data-bbox="540 1444 846 1480">Body Mass Index; BMI</p> <p data-bbox="540 1522 808 1558">Waist circumference</p> <p data-bbox="540 1600 737 1635">Blood pressure</p> |
| <b>Quality of life</b>                | <p data-bbox="540 1669 1398 1774">WHOQOL BREF- A 26 item questionnaire developed by WHO to assess quality of life in adults<sup>27</sup></p> <p data-bbox="540 1816 1393 1852">The European Quality of Life questionnaire; EuroQol EQ-5D 5L<sup>24</sup></p>                                                                                                      |

|                           |                                                                                                                                                                                                                                                                                                                                                                                                                                                                    |
|---------------------------|--------------------------------------------------------------------------------------------------------------------------------------------------------------------------------------------------------------------------------------------------------------------------------------------------------------------------------------------------------------------------------------------------------------------------------------------------------------------|
|                           | EQ-5D is a quality of life measure that includes five quality of life questions on mobility, self-care, usual activity, pain, anxiety / depression and a scale of 0 to 100 on how the person is feeling on that day.                                                                                                                                                                                                                                               |
| <b>Depression</b>         | Hospital Anxiety and Depression Scale; HADS <sup>28</sup><br>HADS measures depression and anxiety that will address psychological change with a scale from 0 to 3.                                                                                                                                                                                                                                                                                                 |
| <b>Stress</b>             | Perceived stress questionnaire; PSS <sup>29</sup><br>PSS is a psychological instrument for measuring the perception of stress. Ten items with a scale from 1 to 4.                                                                                                                                                                                                                                                                                                 |
| <b>Physical activity</b>  | International Physical Activity Questionnaire; IPAQ <sup>30</sup><br>Short form IPAQ is an assessment of physical activity comprising of seven questions. There are two forms of output from scoring the IPAQ. Results can be reported in categories (low activity levels, moderate activity levels or high activity levels) or as a continuous variable (MET minutes a week). MET minutes represent the amount of energy expended carrying out physical activity. |
| <b>Diabetes knowledge</b> | Brief diabetes illness perception questionnaire; B-IPQ <sup>31</sup> .                                                                                                                                                                                                                                                                                                                                                                                             |



|                                              |                                                                                                                                                                                                                                                                                                                                                                                                                                                                                                                                                                                                                                                                                                                                                                                                                                                       |
|----------------------------------------------|-------------------------------------------------------------------------------------------------------------------------------------------------------------------------------------------------------------------------------------------------------------------------------------------------------------------------------------------------------------------------------------------------------------------------------------------------------------------------------------------------------------------------------------------------------------------------------------------------------------------------------------------------------------------------------------------------------------------------------------------------------------------------------------------------------------------------------------------------------|
|                                              | <p>B-IPQ has nine components of which the first five questions assess the cognitive representation of illness perception, two of the questions assess the emotional representation, one item assesses comprehensibility and one item on the root cause of the illness</p> <p>Diabetes Self-Management Education and Support; DMSES<sup>32</sup>.</p> <p>DMSES is one of the most widely used scale in measuring self-efficacy in type 2 diabetes management. The Thai-DMSES has twenty questions which has been demonstrated to have good psychometric properties<sup>32</sup></p> <p>Summary of Diabetes self-care activities questionnaire SDSCA<sup>34</sup></p> <p>SDSCA is a diabetes self-care activities questionnaire focusing on general diet, diabetes-specific diet, physical activity, blood-glucose testing, foot care, and smoking.</p> |
| <p><b>Satisfaction with intervention</b></p> | <p>Chronic Illness Resources survey (CIRS)<sup>35</sup></p> <p>CIRS is a questionnaire to represent patient's received support.</p> <p>Individual's support for behavioural-specific disease management is assessed: proximal support e.g. friend and family and distal factor e.g. neighbourhood or community.</p>                                                                                                                                                                                                                                                                                                                                                                                                                                                                                                                                   |
|                                              | <p>Modified Medical Interview Satisfaction scale (MISS-21)<sup>36</sup></p> <p>MISS-21 is a questionnaire to measure patient satisfaction with patient and health care professional communication/consultation.</p>                                                                                                                                                                                                                                                                                                                                                                                                                                                                                                                                                                                                                                   |

197

**198 Data collection and follow-up**

199 Each participant will be involved in the study for 12 months after taking consent and baseline  
200 data. The trial is expected to start January 2020 and finish October 2021.

201

202 Data collection methods will include:

203 a) Questionnaires: Questionnaire data will be collected face-to-face by research assistants for the  
204 full sample at baseline, 6 and 12 months at the community hospital where participants are  
205 recruited (Table 1). A custom-designed form linked to Microsoft Access will be used to collect,  
206 validate, verify, and store respondents' data where possible or else data will be collected via  
207 paper forms and double-entered into the databases. All data files and databases will be password  
208 protected.

209

210 b) Biological samples: Blood samples will be collected at baseline, 6 and 12 months, to measure  
211 fasting blood glucose, HbA1c and lipids, coordinating where possible with the annual routine  
212 tests offered to patients to reduce duplication. All blood samples will be administered from  
213 participants by trained phlebotomists. Data will be linked to the participant information using a  
214 unique respondent ID, which will be assigned to all study participants.

215

216 c) Interviews: During the delivery of the intervention, a process evaluation using a subset of  
217 participants will be followed up using in-depth interviews and focus group discussions. These  
218 will be audio-recorded. Data will be collected using a range of qualitative methods: a) one to  
219 one interviews, and focus group discussions with nurses, health volunteers, people with diabetes  
220 and their carers (5-10 focus groups, and 20 semi-structured interviews) and b) ethnography

1  
2  
3 221 through direct observations including video recordings of intervention delivery, and unstructured  
4  
5 222 interviews with clinical managers and policy makers. The data collected will be used to  
6  
7  
8 223 capture the range of experiences of the intervention, and identify unanticipated pathways to  
9  
10 224 generate new theories as well as exploring the scalability of the intervention.  
11

12 225

### 14 226 **Trial follow-up appointments**

16  
17 227 The research team will hold weekly briefings with the study coordinators to generate a list of  
18  
19 228 priority areas and loss to follow-up participant lists. Arrangements to follow-up participants who  
20  
21 229 have not turned up for their appointment will be made, with attempts to contact participants  
22  
23  
24 230 through SMS, phone calls, or house visits. Participants will be declared loss to follow-up if they  
25  
26 231 do not show for a month and are untraceable.  
27

28 232

### 31 233 **Data management**

33  
34 234 A data collection protocol will be developed, and the study coordinator in Thailand will provide  
35  
36 235 training to fieldworkers before data collection commences. Validation will be performed a  
37  
38 236 random sample of questionnaire data by crosschecking with clinic records. Any discrepancies  
39  
40  
41 237 will be followed-up and addressed by field workers, re-contacting participants to clarify as  
42  
43 238 necessary. Quantitative data will be entered directly via a form with built-in data checks to  
44  
45 239 minimise transcription errors (or where necessary collected on paper and later double entered  
46  
47  
48 240 into the electronic form). Post entry checks will be conducted using statistical software. All  
49  
50 241 hospital laboratories have their own internal quality assurance protocols and are also linked to a  
51  
52 242 national external quality assurance mechanism. Fieldworkers will be trained in qualitative  
53  
54  
55 243 methods and an interview schedule will be devised.  
56  
57  
58  
59

1  
2  
3 2444  
5 **245 Statistical analysis**6  
7  
8 **246 1. Quantitative analysis**

9  
10 247 Available outcome data will be analysed on an intention-to-treat basis. Potential clustering of  
11  
12 248 outcomes at the level of community primary care units will be accounted for using mixed-effects  
13  
14 249 models. Adjustment for baseline imbalances in outcomes or relevant covariates will be  
15  
16 250 considered as appropriate.  
17

18  
19 25120  
21 **252 2. Qualitative analysis**

22  
23 253 Qualitative data from interviews, focus groups and direct observations be will transcribed and  
24  
25 254 analysed using NVivo software. The data will be analysed using a descriptive, phenomenological  
26  
27 255 approach to understand participants' experiences and interpret them within their respective  
28  
29 256 cultural contexts. Comparative analysis will compare and contrast these themes across  
30  
31 257 participants. Deviant cases will be actively sought throughout the analysis and emerging ideas  
32  
33 258 and themes modified in response. In addition, thematic analysis will be used to inform elements  
34  
35 259 of scalability and to produce a set of considerations in making decisions about the scalability of  
36  
37 260 the intervention.  
38  
39  
40

41  
42 26143  
44 **262 ETHICS AND DISSEMINATION**

45  
46 263 This study is to be conducted according to the international standards of Good Clinical Practice  
47  
48 264 (International Conference on Harmonization guidelines), Declaration of Helsinki, and  
49  
50 265 International Ethical Guidelines for Biomedical Research Involving Human Subjects, applicable  
51  
52 266 national government regulations, and institutional research policies and procedures. All  
53  
54  
55  
56  
57  
58  
59

1  
2  
3 267 investigators will receive GCP training at the onset of the study. Ethical approvals will be sought  
4  
5 268 prior to commencement of the project from Thailand's Central Research Ethics Committee and  
6  
7  
8 269 the London School of Hygiene & Tropical Medicine. The study protocol, informed consent form,  
9  
10 270 participant's information sheet and other relevant information has been submitted to and  
11  
12 271 approved by Chiang Mai University and local Ethics Committee. Any future amendments of the  
13  
14  
15 272 protocol shall be submitted to and approved by the Institutional Review Board (IRB) before  
16  
17 273 implementation  
18  
19  
20 274

### 21 275 **Trial monitoring and oversight**

22  
23  
24 276 The role of the Trial Steering Committee (TSC) is to provide overall supervision of the trial. The  
25  
26 277 TSC will meet every six months. The TSC will include experts in the field of DSME, health  
27  
28 278 psychology and clinical trials, as well as an independent Chair. In addition, we will have patient  
29  
30 279 and carer representatives and policy representation.  
31  
32  
33  
34 280

### 35 36 281 **Dissemination**

37  
38  
39 282 Expected output and impact research findings will be disseminated to scientific audiences at  
40  
41 283 major conferences and published in high-impact open-access scientific journals; planned  
42  
43 284 publications include those on intervention development, primary trial results, and process  
44  
45 285 evaluation, and health systems analysis, at a minimum. This study is expected to have a major  
46  
47 286 policy impact due to the close involvement of a key policy maker in the project. Towards the end  
48  
49  
50 287 of the study a dedicated workshop will be held with key governmental stakeholders to  
51  
52 288 disseminate the recommended model for DSME implementation in Thailand and encourage  
53  
54  
55 289 inclusion of a large-scale scientific evaluation into any national implementation of the scheme.  
56  
57  
58  
59

1  
2  
3 290  
4  
5 291 **Contributors:** CA, SS, OQ, PM, SK were involved in conception and trial design. CA, KP, PM  
6  
7 292 and SK wrote the first draft of the trial design proposal. KR, WT, KH, KK were involved in  
8  
9 293 critical revision of the trial design proposal. All authors contributed to finalising the trial  
10  
11 294 protocol. CA, KP, IP, CP, AH, NW were involved with preparation of the manuscript for  
12  
13 295 submission. All authors reviewed the manuscript and approved the manuscript for publication.  
14  
15  
16  
17 296

### 19 297 **Funding**

20  
21 298 This study is supported by UK Medical Research Council (MRC) grant number  
22  
23 299 [MR/R020876/1] and the Thailand Research Fund (TRF) grant number [DBG6180007].  
24  
25

26 300

### 28 301 **Data availability**

29  
30 302 Data will be shared upon reasonable request  
31  
32

33 303

### 35 304 **Patient and Public Involvement**

36  
37 305 Patients or the public WERE NOT involved in the design, or conduct, or reporting, or  
38  
39 306 dissemination plans of our research  
40  
41

42 307

### 44 308 **Trial sponsor**

45  
46 309 This study is sponsored by London School of Hygiene & Tropical Medicine, Keppel Street,  
47  
48 310 London WC1E 7HT, UK [16113].  
49  
50

### 51 311 **Competing interests**

52  
53 312 None declared  
54  
55  
56  
57  
58  
59  
60

1  
2  
3 313 **Ethics approval**  
4

5 314 The study has been approved by the Chiang Mai University Research Ethics Committee  
6  
7 [326/2018] and the London School of Hygiene & Tropical Medicine [16113/RR/12850].  
8  
9

10 316

11  
12 317 **REFERENCES**  
13

- 14 318 1. Deerochanawong C, Ferrario A. Diabetes management in Thailand: a literature  
15  
16 review of the burden, costs, and outcomes. *Glob Health* 2013; 9: 11.  
17 319  
18  
19 320 2. International Diabetes Federation. *IDF Diabetes Atlas Seventh Edition*. 2015.  
20  
21 321 3. Effect of intensive blood-glucose control with metformin on complications in  
22  
23 overweight patients with type 2 diabetes (UKPDS 34). *The Lancet* 1998; 352: 854–  
24 322 65.  
25  
26 323  
27  
28 324 4. Gaede P, Vedel P, Larsen N, Jensen GVH, Parving H-H, Pedersen O. Multifactorial  
29  
30 intervention and cardiovascular disease in patients with type 2 diabetes. *N Engl J*  
31 325 *Med* 2003; 348: 383–93.  
32  
33 326  
34  
35 327 5. Rangsin R. An assessment of quality of care among patients diagnosed with type 2  
36  
37 diabetes and hypertension visiting hospitals of ministry of public health and Bangkok  
38 328 Metropolitan Administration in Thailand. 2012.  
39  
40 329  
41  
42 330 6. Auemaneekul N, Chandanasotthi P, Rawiworrakul T, et al. Community Partnership,  
43  
44 Contextbased Intervention and Diabetes Control in Thailand. *J Public Health* 2016;  
45 331 46: 236–47.  
46  
47 332  
48  
49 333 7. Haas L, Maryniuk M, Beck J, et al. National standards for diabetes self-management  
50  
51 education and support. *Diabetes Educ* 2012; 38: 619–629.  
52 334  
53  
54  
55  
56  
57  
58  
59  
60

- 1  
2  
3 335 8. Chryala CA, et al. Diabetes self-management education for adults with type 2  
4  
5 336 diabetes mellitus: A systematic review of the effect on glyceemic control. Patient  
6  
7 Educ Couns 2016; 99: 926–43.  
8 337  
9  
10 338 9. Pillay J, Armstrong MJ, Butalia S, et al. Behavioral Programmes for Type 2 Diabetes  
11  
12 339 Mellitus: A Systematic Review and Network Meta-analysis. Ann Intern Med 2015;  
13  
14 340 163: 848.  
15  
16 341 10. Doyle G, O'Donnell S, Quigley E, et al. Patient level cost of diabetes self-  
17  
18 342 management education programmes: an international evaluation. BMJ Open 2017; 7:  
19  
20 343 e013805.  
21  
22 344 11. Fisher EB, Boothroyd RI, Elstad EA, et al. Peer support of complex health behaviors  
23  
24 345 in prevention and disease management with special reference to diabetes: systematic  
25  
26 346 reviews. Clin Diabetes Endocrinol 2017; 3. DOI:10.1186/s40842-017-0042-3.  
27  
28 347 12. Dale JR, Williams SM, Bowyer V. What is the effect of peer support on diabetes  
29  
30 348 outcomes in adults? A systematic review. Diabet Med 2012; 29: 1361–77.  
31  
32 349  
33 350 13. Norris SL, Chowdhury FM, Van Le K, et al. Effectiveness of community health  
34  
35 351 workers in the care of persons with diabetes. Diabet Med J Br Diabet Assoc 2006;  
36  
37 352 23: 544–56.  
38  
39 353 14. World Health Organization. Peer support programmes in diabetes: Report of a WHO  
40  
41 354 consultation 5-7 November 2007. Geneva, Switzerland: WHO, 2008.  
42  
43 355 15. Fisher EB, Boothroyd RI, Coufal MM, et al. Peer Support For Self-Management Of  
44  
45 356 Diabetes Improved Outcomes In International Settings. Health Aff (Millwood) 2012;  
46  
47 357 31: 130–9.  
48  
49  
50  
51  
52  
53  
54  
55  
56  
57  
58  
59  
60



- 1  
2  
3 358 16. Trento M, Gamba S, Gentile L, et al. Rethink Organization to iMprove Education  
4  
5 359 and Outcomes (ROME0): A multicenter randomized trial of lifestyle intervention by  
6  
7 360 group care to manage type 2 diabetes. *Diabetes Care* 2010; 33: 745–7.  
8  
9  
10 361 17. Werfalli M, Raubenheimer P, Engel M, et al. Effectiveness of community-based  
11  
12 362 peer-led diabetes self-management programmemes (COMP-DSMP) for improving  
13  
14 363 clinical outcomes and quality of life of adults with diabetes in primary care settings  
15  
16 364 in low and middle-income countries (LMIC): a systematic review and meta-analysis.  
17  
18 365 *BMJ Open* 2015; 5: e007635.  
19  
20  
21 366 18. Keeratiyutawong P, Hanucharurnkl S, Melkus G, Vorapongsathon OPT.  
22  
23 367 Effectiveness of a self-management programme for Thais with type 2 diabetes. *Thai*  
24  
25 368 *J Nurs Res* 2006; 10: 85–97.  
26  
27  
28 369 19. Craig P, Dieppe P, Macintyre S, Michie S, Nazareth I, Petticrew M. Developing and  
29  
30 370 evaluating complex interventions: the new Medical Research Council guidance. *BMJ*  
31  
32 371 2008; a1655.  
33  
34  
35 372 20. Wattana C, Srisuphan W, Pothiban L, Upchurch SL. Effects of a diabetes self-  
36  
37 373 management programme on glycaemic control, coronary heart disease risk, and  
38  
39 374 quality of life among Thai patients with type 2 diabetes. *Nurs Health Sci* 2007; 9:  
40  
41 375 135–41.  
42  
43  
44 376 21. Khunti K, Gray LJ, Skinner T, et al. Effectiveness of a diabetes education and self-  
45  
46 377 management programme (DESMOND) for people with newly diagnosed type 2  
47  
48 378 diabetes mellitus: Three-year follow-up of a cluster randomised controlled trial in  
49  
50 379 primary care. *BMJ* 2012; 344: e2333–e2333.  
51  
52  
53  
54  
55  
56  
57  
58  
59  
60

- 1  
2  
3 380 22. Tuong W, Larsen ER, Armstrong AW. Videos to influence: a systematic review of  
4  
5 381 effectiveness of video-based education in modifying health behaviors. *J Behav Med*  
6  
7 382 2014; 37: 218–33.
- 8  
9  
10 383 23. Moore GF, Audrey S, Barker M, et al. Process evaluation of complex interventions:  
11  
12 384 Medical Research Council guidance. *BMJ* 2015; 350: h1258–h1258. 25Mangham LJ,  
13  
14 385 Hanson K. Scaling up in international health: what are the key issues? *Health Policy*  
15  
16 386 *Plan* 2010; 25: 85–96.
- 17  
18  
19 387 24. Kimman M, et al. Validity of the Thai EQ-5D in an occupational population in  
20  
21 388 Thailand. *Qual Life Res* 2013 Aug; 22(6):1499-506.
- 22  
23  
24 389 25. Clinical Practice Guidelines for Diabetes. Diabetes Association of Thailand, 2017.  
25  
26 390 (<https://www.dmthai.org/index.php/knowledge/healthcare-providers/cpg/443->  
27  
28 391 [guideline-diabetes-care-2017](https://www.dmthai.org/index.php/knowledge/healthcare-providers/cpg/443-guideline-diabetes-care-2017))
- 29  
30  
31 392 26. Aekplakorn A, Bunnag P, Woodward M. et al. Risk Score for Predicting Incident  
32  
33 393 Diabetes in the Thai Population. *Diabetes Care* 2006 Aug; 29(8):1872-1877
- 34  
35 394 27. Mahatnirunkul S. et al. Comparison of the WHOQOL-100 and the WHOQOL-  
36  
37 395 BREF. *Journal of Mental Health of Thailand* 1998; 5(3).
- 38  
39  
40 396 28. Nilchaikovit T. et al. Development of Thai version of Hospital Anxiety and  
41  
42 397 Depression Scale in cancer patients. *J Psychiatr Assoc Thailand* 1996; 41(1):18-30.
- 43  
44 398 29. Wongpakaran N, Wongpakaran T. The Thai version of the PSS-10: An investigation  
45  
46 399 of its psychometric properties. *BioPsychoSocial Medicine* 2010: 4:6
- 47  
48  
49 400 30. Rattanawiwatpong P, et al. Validity and reliability of the Thai version of Short  
50  
51 401 Format International Physical Activity Questionnaire (IPAQ). *J Thai Rehabil* 2006;  
52  
53 402 16(3):147-160.
- 54  
55  
56  
57  
58  
59  
60

- 1  
2  
3 403 31. Leelacharas S, et al. Illness perceptions, lifestyle behaviours, social support and  
4  
5 404 cardiovascular risks in people with Hypertension in Urban and Rural Areas of  
6  
7 405 Thailand. *Pacific Rim Int J Nur Res* 2015; 19  
8  
9  
10 406 32. Lamsumang, W. The development of the Thai version of the diabetes management  
11  
12 407 self-efficacy scale (T-DMSES) for older adults with type 2 diabetes. State University  
13  
14 408 of New York at Buffalo, New York; 2009.  
15  
16  
17 409 33. Sangruangake M, Jirapornkul C, Hurst C. Psychometric Properties of Diabetes  
18  
19 410 Management Self-Efficacy in Thai Type 2 Diabetes Mellitus Patients: A Multicenter  
20  
21 411 Study. *Int J Endocrinol*. 2017;2017:2503156. doi:10.1155/2017/2503156)  
22  
23  
24 412 34. Keeratiyatawong, P, Hanucharumkul, S., Melkus, G. D. E., Panpakdee, O.,  
25  
26 413 Vorapongsathorn T. Effectiveness of a self-management programme for Thais with  
27  
28 414 type 2 diabetes. *Thai J Nurse Res*. 2006; 10: 85-97  
29  
30  
31 415 35. Manit A, et al. Development of needs and resources for self-management assessment  
32  
33 416 instrument in Thais with type 2 diabetes: Cross-cultural adaptation. *J Med Assoc*  
34  
35 417 *Thai* 2011; Vol. 94 No. 11.  
36  
37  
38 418 36. Meakin R and Weinman J. The 'Medical Interview Satisfaction Scale' (MISS-21)  
39  
40 419 adapted for British general practice. *Family Practice* 2002; 19:257–263.  
41  
42  
43 420

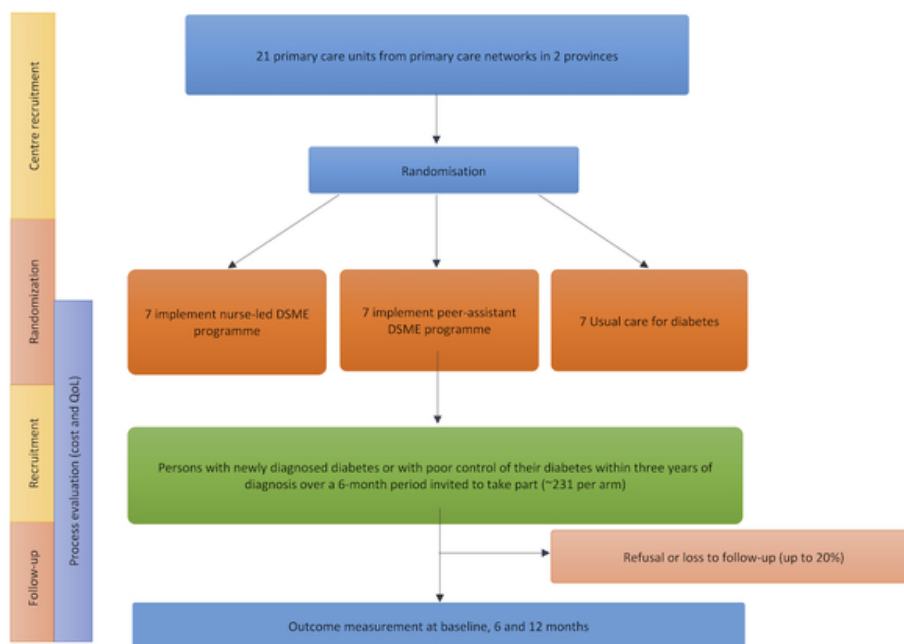

Figure 1: Trial flow diagram

27x20mm (600 x 600 DPI)

# BMJ Open

## A Scalable Solution for Delivery of Diabetes Self-Management Education in Thailand (DSME-T): A Cluster Randomized Trial Study Protocol

|                                 |                                                                                                                                                                                                                                                                                                                                                                                                                                                                                                                                                                                                                                                                                                                                                                                                                                                                                                                                                                                                                                                                                                                                                                                                                                                   |
|---------------------------------|---------------------------------------------------------------------------------------------------------------------------------------------------------------------------------------------------------------------------------------------------------------------------------------------------------------------------------------------------------------------------------------------------------------------------------------------------------------------------------------------------------------------------------------------------------------------------------------------------------------------------------------------------------------------------------------------------------------------------------------------------------------------------------------------------------------------------------------------------------------------------------------------------------------------------------------------------------------------------------------------------------------------------------------------------------------------------------------------------------------------------------------------------------------------------------------------------------------------------------------------------|
| Journal:                        | <i>BMJ Open</i>                                                                                                                                                                                                                                                                                                                                                                                                                                                                                                                                                                                                                                                                                                                                                                                                                                                                                                                                                                                                                                                                                                                                                                                                                                   |
| Manuscript ID                   | bmjopen-2020-036963.R1                                                                                                                                                                                                                                                                                                                                                                                                                                                                                                                                                                                                                                                                                                                                                                                                                                                                                                                                                                                                                                                                                                                                                                                                                            |
| Article Type:                   | Protocol                                                                                                                                                                                                                                                                                                                                                                                                                                                                                                                                                                                                                                                                                                                                                                                                                                                                                                                                                                                                                                                                                                                                                                                                                                          |
| Date Submitted by the Author:   | 28-Jun-2020                                                                                                                                                                                                                                                                                                                                                                                                                                                                                                                                                                                                                                                                                                                                                                                                                                                                                                                                                                                                                                                                                                                                                                                                                                       |
| Complete List of Authors:       | Angkurawaranon, Chaisiri; Chiang Mai University, Department of Family Medicine, Faculty of Medicine<br>Papachristou Nadal, Iliatha; London School of Hygiene and Tropical Medicine, Faculty of Epidemiology and Population Health<br>Mallinson, Poppy; London School of Hygiene and Tropical Medicine Faculty of Epidemiology and Population Health, Department of Non-communicable Disease Epidemiology<br>Pinyopornpanish, Kanokporn; Chiang Mai University, Department of Family Medicine, Faculty of Medicine<br>Quansri, Orawan; Mahidol University<br>Rerkasem, Kittipan ; Chiang Mai University, Department of Surgery, Faculty of Medicine, Chiang Mai University; Chiang Mai University, Research Institute for Health Sciences<br>Srivanchakorn, Supattra; Royal Thai Government Ministry of Public Health<br>Techakehakij, Win; Lampang Hospital<br>Wichit, Nutchath; Surat Thani Rajabhat University<br>Pateekhum, Chanapat; Chiang Mai University<br>Hashmi, Ahmar; Chiang Mai University, Department of Family Medicine<br>Hanson, Kara; London School of Hygiene and Tropical Medicine<br>Khunti, Kamlesh; University of Leicester, Department of Health Sciences<br>Kinra, Sanjay; London School of Hygiene and Tropical Medicine |
| <b>Primary Subject Heading</b>: | Diabetes and endocrinology                                                                                                                                                                                                                                                                                                                                                                                                                                                                                                                                                                                                                                                                                                                                                                                                                                                                                                                                                                                                                                                                                                                                                                                                                        |
| Secondary Subject Heading:      | Evidence based practice, Diabetes and endocrinology, General practice / Family practice                                                                                                                                                                                                                                                                                                                                                                                                                                                                                                                                                                                                                                                                                                                                                                                                                                                                                                                                                                                                                                                                                                                                                           |
| Keywords:                       | DIABETES & ENDOCRINOLOGY, EDUCATION & TRAINING (see Medical Education & Training), Protocols & guidelines < HEALTH SERVICES ADMINISTRATION & MANAGEMENT                                                                                                                                                                                                                                                                                                                                                                                                                                                                                                                                                                                                                                                                                                                                                                                                                                                                                                                                                                                                                                                                                           |
|                                 |                                                                                                                                                                                                                                                                                                                                                                                                                                                                                                                                                                                                                                                                                                                                                                                                                                                                                                                                                                                                                                                                                                                                                                                                                                                   |

SCHOLARONE™  
Manuscripts

1  
2  
3  
4  
5  
6  
7  
8  
9  
10  
11  
12  
13  
14  
15  
16  
17  
18  
19  
20  
21  
22  
23  
24  
25  
26  
27  
28  
29  
30  
31  
32  
33  
34  
35  
36  
37  
38  
39  
40  
41  
42  
43  
44  
45  
46  
47  
48  
49  
50  
51  
52  
53  
54  
55  
56  
57  
58  
59  
60

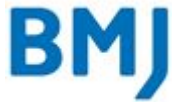

I, the Submitting Author has the right to grant and does grant on behalf of all authors of the Work (as defined in the below author licence), an exclusive licence and/or a non-exclusive licence for contributions from authors who are: i) UK Crown employees; ii) where BMJ has agreed a CC-BY licence shall apply, and/or iii) in accordance with the terms applicable for US Federal Government officers or employees acting as part of their official duties; on a worldwide, perpetual, irrevocable, royalty-free basis to BMJ Publishing Group Ltd ("BMJ") its licensees and where the relevant Journal is co-owned by BMJ to the co-owners of the Journal, to publish the Work in this journal and any other BMJ products and to exploit all rights, as set out in our [licence](#).

The Submitting Author accepts and understands that any supply made under these terms is made by BMJ to the Submitting Author unless you are acting as an employee on behalf of your employer or a postgraduate student of an affiliated institution which is paying any applicable article publishing charge ("APC") for Open Access articles. Where the Submitting Author wishes to make the Work available on an Open Access basis (and intends to pay the relevant APC), the terms of reuse of such Open Access shall be governed by a Creative Commons licence – details of these licences and which [Creative Commons](#) licence will apply to this Work are set out in our licence referred to above.

Other than as permitted in any relevant BMJ Author's Self Archiving Policies, I confirm this Work has not been accepted for publication elsewhere, is not being considered for publication elsewhere and does not duplicate material already published. I confirm all authors consent to publication of this Work and authorise the granting of this licence.

1  
2  
3 **A Scalable Solution for Delivery of Diabetes Self-Management Education in Thailand**  
4  
5 **(DSME-T): A Cluster Randomized Trial Study Protocol**  
6

7 Chaisiri Angkurawaranon<sup>1\*</sup>, Iliatha Papachristou Nadal<sup>2,3</sup>, Poppy Mallinson<sup>2</sup>, Kanokporn  
8 Pinyopornpanish<sup>1</sup>, Orawan Quansri<sup>4</sup>, Kittipan Rerkasem<sup>5,6</sup>, Supattra Srivanichakorn<sup>7</sup>, Win  
9 Techakehakij<sup>8</sup>, Nutchath Wichit<sup>9</sup>, Chanapat Pateekhum<sup>1</sup>, Ahmar Hashmi<sup>1</sup>, Kara Hanson<sup>10</sup>,  
10 Kamlesh Khunti<sup>11</sup>, Sanjay Kinra<sup>2</sup>  
11  
12  
13  
14  
15

16  
17 **Author affiliations**  
18

19 <sup>1</sup> Department of Family Medicine, Faculty of Medicine, Chiang Mai University  
20

21 <sup>2</sup> Faculty of Epidemiology and Population Health, London School of Hygiene and Tropical  
22 Medicine  
23  
24

25 <sup>3</sup> Psychological Medicines, King's College London  
26

27 <sup>4</sup> ASEAN Institute for Health Development, Mahidol University  
28

29 <sup>5</sup> Department of Surgery, Faculty of Medicine, Chiang Mai University  
30

31 <sup>6</sup> NCD Centre of Excellence, Research Institute for Health Sciences, Chiang Mai University  
32

33 <sup>7</sup> Department of Disease Control, Ministry of Public Health  
34

35 <sup>8</sup> Department of Social Medicine, Lampang Hospital  
36

37 <sup>9</sup> Faculty of Nursing, Suratthani Rajabhat University  
38

39 <sup>10</sup> Faculty of Public Health and Policy, London School of Hygiene and Tropical Medicine  
40

41 <sup>11</sup> Diabetes Research Center, University of Leicester  
42  
43  
44  
45  
46  
47  
48

49 Corresponding author: Chaisiri Angkurawaranon, Department of Family Medicine, Faculty of  
50 Medicine, Chiang Mai University, email: [chaisiri.a@cmu.ac.th](mailto:chaisiri.a@cmu.ac.th)  
51  
52  
53  
54  
55  
56  
57  
58



## 1 **ABSTRACT**

2 **Introduction** Type 2 diabetes mellitus is amongst the foremost health challenges facing policy  
3 makers in Thailand as its prevalence has more than tripled over the last two decades, accounting  
4 for considerable death, disability and healthcare expenditure. Diabetes Self-Management  
5 Education (DSME) programmes show promise in improving diabetes outcomes, but this is not  
6 routinely utilised in Thailand. This study aims to test a culturally-tailored DSME model in  
7 Thailand, using a 3-arm cluster randomised controlled trial comparing a nurse-led model, a peer-  
8 assisted model, and standard care. We will test which model is effective and cost effective to  
9 improve cardiovascular risk and control of blood glucose among people with diabetes.

10  
11 **Methods and analysis** 21 primary care units in northern Thailand will be randomised to one of  
12 three interventions, enrolling a total of 693 patients. The primary care units will be randomised  
13 (1:1:1) to participate in a culturally-tailored DSME intervention for 12 months. The three-arm  
14 trial design will compare effectiveness of nurse-led, peer-assisted (Thai village health volunteers)  
15 and standard care. The primary trial outcomes are changes in haemoglobin A1c and  
16 cardiovascular risk score. A process evaluation and cost effectiveness evaluation will be  
17 conducted to produce policy relevant guidance for the Thai Ministry of Public Health. The  
18 planned trial period will start in January 2020 and finish October 2021.

19  
20 **Ethics and dissemination** Ethical approval has been obtained from Thailand and the UK. We  
21 will share our study data with other researchers, advertising via our publications and web  
22 presence. In particular, we are committed to sharing our findings and data with academic  
23 audiences in Thailand and other low- and middle-income countries.

1  
2  
3 24 **Trial registration number:**  
4

5 25 ClinicalTrials.gov ID NCT03938233  
6  
7

8 26 **Strengths and limitation of this study**  
9

- 10 27 • A three-arm cluster randomized control trial to evaluate clinical and cost-effectiveness of  
11  
12 28 a culturally tailored DSME under two alternative modes of delivery (nurse-led and peer-  
13  
14 29 assisted) will provide policy makers with options for scalability.  
15  
16  
17 30 • A culturally-tailored DSME programme has been developed with input from stakeholders  
18  
19 31 (policy makers, clinicians, nurses, village health volunteers and people with diabetes).  
20  
21  
22 32 • A series of short films has been developed to introduce key topics, as there is increasing  
23  
24 33 recognition that films are a highly efficient medium for communicating information,  
25  
26 34 particularly in low literacy settings  
27  
28  
29  
30  
31  
32  
33  
34  
35  
36  
37

## 38 INTRODUCTION

39 Type 2 diabetes mellitus (hereto referred to as diabetes) is amongst the foremost health  
40 challenges facing policy makers in Thailand. Its prevalence has more than tripled over the last  
41 two decades to an estimated 4 million adults (age adjusted prevalence 7.1%) living with diabetes  
42 in 2015.<sup>1,2</sup> Diabetes is associated with several macrovascular (e.g. ischaemic heart disease) and  
43 microvascular complications (e.g. nephropathy, retinopathy, neuropathy, and foot disease),  
44 which primarily account for the considerable death and disability (of which diabetes is the 5<sup>th</sup>  
45 leading cause in Thailand). In addition, diabetes in Thailand causes two-fold increase in  
46 healthcare expenditure and significant loss of economic productivity—of both people with  
47 diabetes and their carers.<sup>1-4</sup>

48 The complications of diabetes can be largely prevented or delayed through lifestyle change and  
49 medication when necessary, and regular screening for early detection and management of  
50 complications to control risk factors such as blood glucose, lipids and blood pressure.<sup>3,4</sup> Under  
51 Thailand's universal health coverage, nearly everyone diagnosed with diabetes receives timely  
52 medical care (>97%) and has access to screening. Yet, surveys suggest that only about half of the  
53 people with diabetes achieve optimal control of risk factors or receive annual screening for  
54 microvascular complications (53-60%).<sup>1,5</sup> Limited data support a lack of engagement and self-  
55 management skills among those diagnosed with diabetes as the main underlying reasons for this.<sup>6</sup>  
56 Successful management of diabetes involves a considerable degree of self-management. People  
57 with diabetes need to adhere to multiple behaviours, including healthy lifestyles, regular  
58 monitoring and medication, problem-solving and healthy coping strategies. In this, they are  
59 greatly supported by diabetes self-management education (DSME), defined as 'a collaborative  
60 and ongoing process intended to facilitate the development of knowledge, skills, and abilities  
61 that are required for successful self-management of diabetes'.<sup>7</sup> Evidence from over 100 studies,

1  
2  
3 62 including many randomised controlled trials conducted predominantly in high-income countries,  
4  
5 63 suggests that DSME programmes are associated with improvements in a range of behavioural  
6  
7 64 outcomes (knowledge, behaviours, self-efficacy, psychosocial), and clinical outcomes  
8  
9  
10 65 (physiological risk factors, screening for complications, quality of life),<sup>8,9</sup> and are cost-  
11  
12 66 effective.<sup>10</sup> Therefore, DSME programmes are recommended by most clinical guidelines.<sup>7</sup>  
13  
14  
15 67 However, there is considerable heterogeneity in the effectiveness of DSME programmes<sup>8,9</sup>.  
16  
17 68 Programmes that are more effective usually offer more than 10 hours of contact between trainers  
18  
19 69 and patients, incorporate behavioural approaches and provide longer-term support mechanisms.  
20  
21 70 However, providing intensive and sustained support has cost implications, resulting in ongoing  
22  
23 71 efforts to identify more cost-efficient ways to deliver DSME, notably through use of lay health  
24  
25 72 workers or peer educators, such as Thai village health volunteers (VHV).  
26  
27  
28 73 Peers can support sustained changes in complex health behaviours by providing assistance in  
29  
30 74 daily management, social and emotional support, linkage to clinical care, and ongoing  
31  
32 75 availability of support.<sup>11,12</sup> Unlike the educational/psychological framework of professional  
33  
34 76 support, peer support operates on a social support framework. Although traditionally restricted to  
35  
36 77 those with experience of disease, the definition of peers has been expanded to include other non-  
37  
38 78 professionals with a close relationship with the community (e.g. VHV).<sup>13</sup> However, despite  
39  
40 79 widespread interest, empirical data on effectiveness of peers in supporting behaviour change in  
41  
42 80 chronic diseases, including diabetes, is limited and inconsistent.<sup>14,15</sup> In an earlier review, the  
43  
44 81 World Health Organisation did not find sufficient evidence to recommend peer support  
45  
46 82 programmes as a policy option for diabetes management in LMICs.<sup>16</sup> Whereas many studies on  
47  
48 83 the effectiveness of DSME programmes come from high-income countries (HIC), there is a  
49  
50 84 dearth of data from LMIC settings on cost-effectiveness, acceptability and potential adverse  
51  
52  
53  
54  
55  
56  
57  
58  
59  
60

1  
2  
3 85 consequences of peer support programmes, as well as optimal strategies for mobilising and  
4  
5 86 integrating peers in diabetes care pathways.<sup>12,17-18</sup>  
6

7  
8 87 In the Thai healthcare system, structured DSME is not routinely available. While several small-  
9  
10 88 scale studies from Thailand have demonstrated that DSME can strengthen self-management of  
11  
12 89 diabetes, negative perceptions of educational programmes and concerns about the burden on  
13  
14 90 existing staff time and costs, have so far prevented the introduction of DSME.<sup>1,18</sup> However,  
15  
16 91 recent policy developments in Thailand are supportive of DSME introduction, if a scalable  
17  
18 92 model can be found. We therefore hypothesise that a nurse-led and/or peer-assisted model for  
19  
20 93 DSME delivery will be effective in improving blood glucose among people with diabetes, with  
21  
22 94 the peer-assisted model being the more scalable option for the Thai healthcare system. We  
23  
24 95 propose to evaluate this through a three-arm cluster randomised controlled trial.  
25  
26  
27  
28  
29  
30

## 31 97 **METHODS AND ANALYSIS**

### 32 33 98 **Study design**

34  
35 99 This study is a MRC complex intervention,<sup>19</sup> three-arm cluster randomised controlled trial.  
36  
37 100 Primary care units from within two provinces: Chiang Mai and Lampang will be randomised for  
38  
39 101 patients to receive either the nurse-led or peer-assisted DSME intervention or standard care (brief  
40  
41 102 education session by a nurse). Assessments will be undertaken at baseline, 6- and 12-month  
42  
43 103 follow up. A process and cost-effective evaluation will also be conducted.  
44  
45  
46  
47  
48

### 49 105 **Setting and Participant Selection**

50  
51 106 Potential participants requiring a DSME intervention will be recruited from 21 primary care units  
52  
53 107 in Chiang Mai (7 primary care units) and Lampang provinces (14 primary care units) in northern  
54  
55  
56  
57  
58  
59  
60

1  
2  
3 108 Thailand. Chiang Mai is a province of over 1.4 million people with 24 district hospitals and  
4  
5 109 about 250 primary care units. Lampang is a province of approximately 700,000 people with 12  
6  
7  
8 110 district hospitals and about 140 primary care units. While diabetes is diagnosed at tertiary and  
9  
10 111 district hospitals, it is managed at the primary care unit health centres, which are served by a full-  
11  
12 112 time nurse (doctor visits weekly), and 10-15 village health volunteers (VHV) linking patients in  
13  
14 113 the community.

15  
16  
17 114 From clinical records, we will recruit all new referrals for diabetes management and patients  
18  
19 115 with uncontrolled diabetes diagnosed in the past 3 years at the 21 primary care units over a 9-  
20  
21 116 month period (N=693). Posters and information sheets will be used to provide necessary, trial-  
22  
23 117 related information to prospective participants (Figure 1).  
24  
25

26 118

27  
28 119 Participants presenting to one of the 21 primary care units will be included if they are:

- 29  
30  
31 120 1. Over 18 years of age with a new referral for type 2 diabetes management;  
32  
33 121 2. Over 18 years of age with uncontrolled diabetes ( $HbA1c > 7\%$ ) within the first three  
34  
35 122 years of diagnosis;  
36  
37 123 2. Willing and able to attend educational group meetings; and  
38  
39 124 3. Available for 6- and 12-month follow-up visits  
40  
41

42 125 Participants will be excluded if they:

- 43  
44 126 1. Have advanced diabetic complications such as diabetic nephropathy, diabetic  
45  
46 127 retinopathy, or amputations; or if they are pregnant;  
47  
48 128 2. Have learning disabilities, dementia or active severe mental illness; or  
49  
50 129 3. Lack the capacity to give voluntary, informed consent.  
51  
52  
53

54 130  
55  
56  
57  
58  
59  
60

### 131 **Randomisation**

132 Stratified by province, 21 primary care units (7 from Chiang Mai and 14 from Lampang) will be  
133 randomised to provide one of three interventions: (1) nurse-led DSME; (2) nurse-led DSME with  
134 peer assistance (provided by Thai village health volunteers, VHV); or (3) standard care (brief  
135 education session by a nurse), resulting in seven primary care units in each arm of the study. All  
136 primary care units follow protocols for diabetes management as outlined by national guidelines.  
137 Randomisation by province will minimise any variation in practice between the different primary  
138 care units.

139

### 140 **Sample size calculation**

141 The trial is powered to detect a difference in HbA1c of 0.6% (SD 1.5%) between control and  
142 intervention arms, based on the effect size of 0.6% noted in a previous diabetes management  
143 study in Thailand<sup>20</sup>, and the fact that an increase in HbA1c of ~0.5% was associated with  
144 increased mortality among people with diabetes<sup>21</sup>. An ICC between hospitals of 0.02 was  
145 assumed based on a similar study which found that The intraclass correlation for HbA1c at three  
146 years was 0.02 (95% confidence interval 0.00 to 0.08)<sup>22</sup>. Allowing for a loss to follow up rate of  
147 20%, 693 participants are needed from 21 primary care units (7 in each trial arm arm) to achieve  
148 80% power at 2.5% significance level.

149

### 150 **Informed consent**

151 Written informed consent will be obtained from all study participants in Thai before any study  
152 procedures are undertaken including enrolment, intervention allocation, follow-up interviews and  
153 blood draws. Local research assistants will explain the study to patients using the patient

1  
2  
3 154 information sheet (supplementary file). The right of the patient to refuse to participate without  
4  
5 155 giving reasons will be respected.  
6  
7  
8 156

9  
10 157 **Intervention description and delivery**

11  
12 158 The DSME programme has been developed using a structured process. This included a desk and  
13  
14 159 literature review and focus groups with local nurses and VHV to develop a paper prototype of  
15  
16 160 the intervention, including a hypothesised pathway of action (e.g. common-sense model of  
17  
18 161 illness, empowerment, discovery learning, social learning, and social support) and a training  
19  
20 162 manual for nurses and VHV. In addition, seven brief films (5-6 minutes long) have been  
21  
22 163 developed and have been used to trigger discussions on key topic areas during DSME  
23  
24 164 intervention meetings covering such topics as medical adherence, dietary recommendation,  
25  
26 165 physical activity and stress management. Films will be used in the intervention as they are  
27  
28 166 increasingly recognised as a highly effective medium for improved recall when communicating  
29  
30 167 large amounts of information, particularly in low literacy settings.<sup>23</sup> Films will be in the local  
31  
32 168 language and use local people.  
33  
34  
35  
36  
37  
38  
39

40 170 Our DSME programme will consist of 4 modules. Module 1 covers the general overview of  
41  
42 171 diabetes, treatment targets and goal settings. Module 2 covers diet and nutrition. Module 3  
43  
44 172 covers physical activity and exercise while module 4 covers stress management and mental  
45  
46 173 health. Each module takes approximately 1.5 hours. Each participant is given an information and  
47  
48 174 self-assessment booklet which covers all contents and materials for the four modules.  
49  
50  
51

52  
53 175 In addition to routine care, in the nurse-led arm, the nurse will deliver the DSME to groups of 5-  
54  
55 176 10 participants per session within the first months after enrolment. The participants in the nurse-  
56  
57  
58  
59



1  
2  
3 177 led arm will also be given a refresher session going over all 4 modules again at 6 months after  
4  
5 178 enrolment. For the peer-assisted arm, a peer volunteer will participate as an assistant to the nurse  
6  
7 179 in the first DSME session. However, the peer will lead the refresher course at 6 months. In  
8  
9  
10 180 addition, participants in the peer-led arm will received monthly contact with the peer either via a  
11  
12 181 home visit or telephone call. During these brief 15-20 minute monthly contacts, peers will ask  
13  
14 182 about the progress made, providing encouragement if plans for self-management are being  
15  
16 183 followed or discussing ways to overcome barriers and set new goals if obstacles are identified.  
17  
18  
19 184 (Table 1)  
20  
21  
22  
23  
24  
25  
26  
27  
28  
29  
30  
31  
32  
33  
34  
35  
36  
37  
38  
39  
40  
41  
42  
43  
44  
45  
46  
47  
48  
49  
50  
51  
52  
53  
54  
55  
56  
57  
58  
59  
60

185 Table 1 Summary DSME Delivery

| Month | Routine care       | Nurse-led DSME                                       | Peer-assisted DSME**                                                                 |
|-------|--------------------|------------------------------------------------------|--------------------------------------------------------------------------------------|
| 0     | Individual session | Nurse provides DSME<br>(4 modules)                   | Nurse provides DSME<br>(4 modules) with peer<br>volunteers to assist the<br>sessions |
| 6     | Individual session | Refresher course<br>(4 modules) provided by<br>nurse | Refresher course<br>(4 modules) led by peers                                         |
| 12    | Outcome assessment | Outcome assessment                                   | Outcome assessment                                                                   |

186 \* participants in the peer-led arm will received monthly contact with the peer either via a home  
187 visit or telephone call.

188  
189 The intervention will be piloted at four community hospitals with four nurses and four VHV who  
190 will be trained to deliver the DSME programme to groups of 5-10 persons with diabetes. This  
191 will allow for refining the intervention, ensuring data collection can be completed as specified,  
192 and to check our assumptions and processes for the trial. For the main trial, a two-day workshop  
193 will be held such that at least one nurse and one VHV from each primary care unit will be trained  
194 by the Thai research team to deliver the DSME programme at the community hospital or  
195 neighbourhoods as appropriate. The trial coordinator will conduct periodic site visits as  
196 additional training as requested and a line of communication will be established between the  
197 research team and each site to answer any issues which may arise.

198

1  
2  
3 199 A process evaluation using qualitative methods will be conducted during the trial period and at  
4  
5 200 the end of the study. Observations including video recordings of intervention delivery will be  
6  
7 201 made. We plan to conduct 5-10 focus group among providers (nurses and village health  
8  
9 202 volunteers) to explore healthcare professionals' perspectives regarding their experience and  
10  
11 203 implementation of the DSME programme, including views on the cultural transferability of  
12  
13 204 DSME and scalability to the Thai context. In addition, we planned to conduct 20 structured  
14  
15 205 interviews with patients. These evaluations will help assess intervention delivery (fidelity, dose  
16  
17 206 and reach), clarify causal mechanisms (those hypothesised by theory of change developed within  
18  
19 207 the project or emergent mechanisms identified), and detail contextual factors (barriers,  
20  
21 208 facilitators) associated with variation in outcomes.<sup>24</sup> The process evaluation will also consist of  
22  
23 209 one-to-one interviews with clinicians and policy makers and direct observations of patients. Data  
24  
25 210 for economic evaluations (resource usage and quality of life using EQ-5D<sup>25</sup>) will be obtained  
26  
27 211 prospectively alongside the trial.  
28  
29  
30  
31  
32

33 212

### 35 213 **Standard care**

36  
37 214 Patients in the control group will receive standard care in the form of a brief didactic educational  
38  
39 215 session at the time of diagnosis of diabetes.<sup>26</sup>  
40  
41  
42

43 216

### 45 217 **Study outcomes**

46  
47 218 The two primary outcomes of the intervention are a difference in trial arms at one-year follow-up  
48  
49 219 in HbA1c and cardiovascular risk score. There is a growing recognition of the importance of  
50  
51 220 combining tight glycaemic control with reduction in other cardiovascular risk factors for  
52  
53 221 prevention of or reduction in complications.<sup>4</sup> The cardiovascular risk will be estimated by the  
54  
55  
56  
57  
58  
59

222 Thai cardiovascular risk score model, which estimates the risk of dying from any cardiovascular  
 223 disease over 10 years based on age, gender, smoking habits, total cholesterol and systolic blood  
 224 pressure, as it has been calibrated for use in a Thai population.<sup>27</sup>

225 Additional secondary outcomes include changes at one year for biophysical data, psychosocial  
 226 and lifestyle data and intervention related data, as described in Table 2.

227

228 **Table 2:** Primary and secondary Outcome measures

| Primary outcomes                        | Measures or questionnaires                                                                                                                                                                                                                                                                       |
|-----------------------------------------|--------------------------------------------------------------------------------------------------------------------------------------------------------------------------------------------------------------------------------------------------------------------------------------------------|
| <b>Haemoglobin A1c levels (HbA1c)</b>   | HbA1c will measure the average blood glucose (sugar) levels over the past two to three months                                                                                                                                                                                                    |
| <b>Thai Cardiovascular risk score</b>   | Estimates the risk of dying from any cardiovascular disease over 10 years based on age, gender, smoking habits, total cholesterol and systolic blood pressure.                                                                                                                                   |
| Secondary outcomes                      | Measures or questionnaires                                                                                                                                                                                                                                                                       |
| <b>Biological and physical measures</b> | Body weight, Body Mass Index; BMI, Blood lipids (LDL-C), waist circumference                                                                                                                                                                                                                     |
| <b>Quality of life</b>                  | WHOQOL BREF- A 26 item questionnaire developed by WHO to assess quality of life in adults <sup>28</sup>                                                                                                                                                                                          |
|                                         | The European Quality of Life questionnaire; EuroQol EQ-5D 5L <sup>25</sup><br>EQ-5D is a quality of life measure that includes five quality of life questions on mobility, self-care, usual activity, pain, anxiety/depression and a scale of 0 to 100 on how the person is feeling on that day. |

|                                             |                                                                                                                                                                                                                                                                                                                                                                                                                                                                                                                                                                                                                                                                      |
|---------------------------------------------|----------------------------------------------------------------------------------------------------------------------------------------------------------------------------------------------------------------------------------------------------------------------------------------------------------------------------------------------------------------------------------------------------------------------------------------------------------------------------------------------------------------------------------------------------------------------------------------------------------------------------------------------------------------------|
| <p><b>Depression</b></p>                    | <p>Hospital Anxiety and Depression Scale; HADS<sup>29</sup></p> <p>HADS measures depression and anxiety that will address psychological change with a scale from 0 to 3.</p>                                                                                                                                                                                                                                                                                                                                                                                                                                                                                         |
| <p><b>Stress</b></p>                        | <p>Perceived stress questionnaire; PSS<sup>30</sup></p> <p>PSS is a psychological instrument for measuring the perception of stress. Ten items with a scale from 1 to 4.</p>                                                                                                                                                                                                                                                                                                                                                                                                                                                                                         |
| <p><b>Physical activity</b></p>             | <p>International Physical Activity Questionnaire; IPAQ<sup>31</sup></p> <p>Short form IPAQ is an assessment of physical activity comprising of seven questions. There are two forms of output from scoring the IPAQ. Results can be reported in categories (low activity levels, moderate activity levels or high activity levels) or as a continuous variable (MET minutes a week). MET minutes represent the amount of energy expended carrying out physical activity.</p>                                                                                                                                                                                         |
| <p><b>Diabetes knowledge and skills</b></p> | <p>Brief diabetes illness perception questionnaire; B-IPQ<sup>32</sup>.</p> <p>B-IPQ has nine components of which the first five questions assess the cognitive representation of illness perception, two of the questions assess the emotional representation, one item assesses comprehensibility and one item on the root cause of the illness</p> <hr/> <p>Diabetes Self-Management Education and Support; DMSES<sup>33</sup>.</p> <p>DMSES is one of the most widely used scale in measuring self-efficacy in type 2 diabetes management. The Thai-DMSES has twenty questions which has been demonstrated to have good psychometric properties<sup>34</sup></p> |

|                                       |                                                                                                                                                                                                                                                                                                              |
|---------------------------------------|--------------------------------------------------------------------------------------------------------------------------------------------------------------------------------------------------------------------------------------------------------------------------------------------------------------|
|                                       | <p>Summary of Diabetes self-care activities questionnaire SDSCA<sup>35</sup></p> <p>SDSCA is a diabetes self-care activities questionnaire focusing on general diet, diabetes-specific diet, physical activity, blood-glucose testing, foot care, and smoking.</p>                                           |
| <b>Satisfaction with intervention</b> | <p>Chronic Illness Resources survey (CIRS)<sup>36</sup></p> <p>CIRS is a questionnaire to represent patient's received support. Individual's support for behavioural-specific disease management is assessed: proximal support e.g. friend and family and distal factor e.g. neighbourhood or community.</p> |
|                                       | <p>Modified Medical Interview Satisfaction scale (MISS-21)<sup>37</sup></p> <p>MISS-21 is a questionnaire to measure patient satisfaction with patient and health care professional communication/consultation.</p>                                                                                          |

229

### 230 **Data collection and follow-up**

231 Each participant will be involved in the study for 12 months after taking consent and baseline  
 232 data. The trial is expected to start January 2020 and finish October 2021.

233

234 Data collection methods will include:

235 a) Questionnaires: Questionnaire data will be collected face-to-face by research assistants for the  
 236 full sample at baseline, 6 and 12 months at the community hospital where participants are  
 237 recruited (Table 1). A custom-designed form linked to RedCap will be used to collect, validate,  
 238 verify, and store respondents' data where possible or else data will be collected via paper forms  
 239 and double-entered into the databases. All data files and databases will be password protected.

240

1  
2  
3 241 b) Biological samples: Blood samples will be collected at baseline, 6 and 12 months, to measure  
4  
5 242 fasting blood glucose, HbA1c and lipids, coordinating where possible with the annual routine  
6  
7 243 tests offered to patients to reduce duplication. All blood samples will be administered from  
8  
9  
10 244 participants by trained phlebotomists. Data will be linked to the participant information using a  
11  
12 245 unique respondent ID, which will be assigned to all study participants.  
13  
14

15 246  
16  
17 247 c) Interviews: During the delivery of the intervention, a process evaluation using a subset of  
18  
19 248 participants will be followed up using in-depth interviews and focus group discussions. These  
20  
21 249 will be audio-recorded. Data will be collected using a range of qualitative methods: a) one-to-one  
22  
23 250 interviews, and focus group discussions with nurses, health volunteers, people with diabetes and  
24  
25 251 their carers (5-10 focus groups, and 20 semi-structured interviews) and b) ethnography through  
26  
27 252 direct observations including video recordings of intervention delivery, and unstructured  
28  
29 253 interviews with clinical managers and policy makers. The data collected will be used to capture  
30  
31 254 the range of experiences of the intervention, and identify unanticipated pathways to generate new  
32  
33 255 theories as well as exploring the scalability of the intervention.  
34  
35  
36  
37

38 256

### 39 257 **Trial follow-up appointments**

40  
41  
42 258 The research team will hold weekly briefings with the study coordinators to generate a list of  
43  
44 259 priority areas and loss to follow-up participant lists. Arrangements to follow-up participants who  
45  
46 260 have not turned up for their appointment will be made, with attempts to contact participants  
47  
48 261 through SMS, phone calls, or house visits. Participants will be declared loss to follow-up if they  
49  
50 262 do not show for a month and are untraceable.  
51  
52  
53

54 263  
55  
56  
57  
58  
59  
60

## 264 **Data management**

265 A data collection protocol will be developed, and the study coordinator in Thailand will provide  
266 training to fieldworkers before data collection commences. Validation will be performed a  
267 random sample of questionnaire data by crosschecking with clinic records. Any discrepancies  
268 will be followed-up and addressed by field workers, re-contacting participants to clarify as  
269 necessary. Using Redcap (<https://redcap.med.cmu.ac.th>), quantitative data will be entered  
270 directly via a form with built-in data checks to minimise transcription errors (or where necessary  
271 collected on paper and later double entered into the electronic form). Post entry checks will be  
272 conducted by exploring the distribution, ranges, and outliers of each variable. All hospital  
273 laboratories have their own internal quality assurance protocols and are also linked to a national  
274 external quality assurance mechanism. Fieldworkers will be trained in qualitative methods and  
275 an interview schedule will be devised.

## 277 **Statistical analysis**

### 278 1. Quantitative analysis

279 Available outcome data will be analysed on an intention-to-treat basis. Potential clustering of  
280 outcomes (HbA1c at 12 months and CVD risk score at 12 months) at the level of community  
281 primary care units will be accounted for using random intercept models. and adjusted for  
282 baseline values. To improve precisions of the estimates, outcomes will be adjusted for their  
283 baseline values. In case of baseline imbalances of relevant covariates (e.g. age, education level,  
284 body mass index), judged by statistical significance at  $p < 0.05$ , we will conduct a secondary  
285 analysis adjusting for these covariates.



## 287 2. Qualitative analysis

288 Qualitative data from interviews, focus groups and direct observations be will transcribed and  
289 analysed using NVivo software. The data will be analysed using a descriptive, phenomenological  
290 approach to understand participants' experiences and interpret them within their respective  
291 cultural contexts. Comparative analysis will compare and contrast these themes across  
292 participants. Deviant cases will be actively sought throughout the analysis and emerging ideas  
293 and themes modified in response. In addition, thematic analysis will be used to inform elements  
294 of scalability and to produce a set of considerations in making decisions about the scalability of  
295 the intervention.

## 297 3. Cost-effective analysis

298 Data for economic evaluation (resource usage and quality of life using EQ-5D) will be obtained  
299 prospectively alongside the trial. We will aim to capture all health service contacts, as well as  
300 out-of-pocket expenses and medication use. Educator training costs will be included, as well as  
301 minimal intervention material costs (as most will be made available freely after the trial). Utility  
302 values from EQ-5D will be derived using a Thai tariff. Incremental cost utility will be estimated  
303 from the Thai health system and societal perspectives, to provide incremental cost-effectiveness  
304 ratio and probability of being cost-effective at Thai government's willingness to pay threshold of  
305 160,000 baht/QALY.

## 310 **ETHICS AND DISSEMINATION**

311 This study is to be conducted according to the international standards of Good Clinical Practice  
312 (International Conference on Harmonization guidelines), Declaration of Helsinki, and  
313 International Ethical Guidelines for Biomedical Research Involving Human Subjects, applicable  
314 national government regulations, and institutional research policies and procedures. All  
315 investigators received GCP training at the onset of the study. Ethical approval was obtained prior  
316 to commencement of the project from Chiang Mai University [No 326/2018] and the London  
317 School of Hygiene & Tropical Medicine [16113/RR/12850]. The study protocol, informed  
318 consent form, participant's information sheet and other relevant information has been approved.  
319 Any future amendments of the protocol shall be submitted to and approved by the Institutional  
320 Review Board (IRB) before implementation

321

### 322 **Trial monitoring and oversight**

323 The role of the Trial Steering Committee (TSC) is to provide overall supervision of the trial. The  
324 TSC will meet every six months. The TSC will include experts in the field of DSME, health  
325 psychology and clinical trials, as well as an independent Chair. In addition, we will have patient  
326 and carer representatives and policy representation.

327

### 328 **Dissemination**

329 Expected output and impact research findings will be disseminated to scientific audiences at  
330 major conferences and published in high-impact, open-access scientific journals; planned  
331 publications include those on intervention development, primary trial results, and process  
332 evaluation, and health systems analysis, at a minimum. This study is expected to have a major

1  
2  
3 333 policy impact due to the close involvement of a key policy maker in the project. Towards the end  
4  
5 334 of the study a dedicated workshop will be held with key governmental stakeholders to  
6  
7 335 disseminate the recommended model for DSME implementation in Thailand and encourage  
8  
9 336 inclusion of a large-scale scientific evaluation into any national implementation of the scheme.  
10  
11  
12  
13

337

14 338 **Contributors:** CA, SS, OQ, PM, SK were involved in conception and trial design. CA, KP, PM  
15  
16 339 and SK wrote the first draft of the trial design proposal. KR, WT, KH, KK were involved in  
17  
18 340 critical revision of the trial design proposal. All authors contributed to finalising the trial  
19  
20 341 protocol. CA, KP, IPN, CP, AH, NW were involved with preparation of the manuscript for  
21  
22 342 submission. All authors reviewed the manuscript and approved the manuscript for publication.  
23  
24  
25

343

#### 26 344 **Funding**

27  
28 345 This study is supported by UK Medical Research Council (MRC) grant number  
29  
30 346 [MR/R020876/1] and the Thailand Research Fund (TRF) grant number [DBG6180007].  
31  
32  
33  
34

347

#### 35 348 **Data availability**

36  
37 349 Data will be shared upon reasonable request  
38  
39

350

#### 40 351 **Patient and Public Involvement**

41  
42 352 Patients or the public WERE NOT involved in the design, or conduct, or reporting, or  
43  
44 353 dissemination plans of our research  
45  
46  
47  
48

354

355

1  
2  
3 356 **Trial registration and version**  
4

5 357 The trial has been registered (ClinicalTrials.gov ID NCT03938233 Version 3 last update January  
6  
7  
8 358 18,2020)  
9

10 359 **Trial sponsor**  
11

12 360 This study is sponsored by London School of Hygiene & Tropical Medicine, Keppel Street,  
13  
14 361 London WC1E 7HT, UK [16113].  
15  
16

17 362 **Competing interests**  
18

19 363 None declared  
20

21 364 **Ethics approval**  
22

23  
24 365 The study has been approved by the Chiang Mai University Research Ethics Committee  
25  
26 366 [326/2018] and the London School of Hygiene & Tropical Medicine [16113/RR/12850].  
27  
28

29 367  
30

31 368 **Figure 1 Legend: Trial flow diagram**  
32

33 369 **REFERENCES**  
34

- 35 370 1. Deerochanawong C, Ferrario A. Diabetes management in Thailand: a literature  
36  
37 review of the burden, costs, and outcomes. *Glob Health* 2013; 9: 11.  
38 371  
39  
40 372 2. International Diabetes Federation. *IDF Diabetes Atlas Seventh Edition*. 2015.  
41  
42 373 3. Effect of intensive blood-glucose control with metformin on complications in  
43  
44 overweight patients with type 2 diabetes (UKPDS 34). *The Lancet* 1998; 352: 854–  
45 374 65.  
46  
47 375  
48  
49 376 4. Gaede P, Vedel P, Larsen N, Jensen GVH, Parving H-H, Pedersen O. Multifactorial  
50  
51 377 intervention and cardiovascular disease in patients with type 2 diabetes. *N Engl J*  
52  
53 *Med* 2003; 348: 383–93.  
54 378  
55  
56  
57  
58  
59  
60

- 1  
2  
3 379 5. Rangsin R. An assessment of quality of care among patients diagnosed with type 2  
4  
5 380 diabetes and hypertension visiting hospitals of ministry of public health and Bangkok  
6  
7 381 Metropolitan Administration in Thailand. 2012.
- 8  
9  
10 382 6. Auemaneekul N, Chandanasotthi P, Rawiworrakul T, et al. Community partnership,  
11  
12 383 context-based intervention and diabetes control in Thailand. *J Public Health* 2016;  
13  
14 384 46: 236–47.
- 15  
16  
17 385 7. Haas L, Maryniuk M, Beck J, et al. National standards for diabetes self-management  
18  
19 386 education and support. *Diabetes Educ* 2012; 38: 619–629.
- 20  
21  
22 387 8. Chrvala CA, Sherr D, Lipman RD. Diabetes self-management education for adults  
23  
24 388 with type 2 diabetes mellitus: A systematic review of the effect on glycemic control.  
25  
26 389 *Patient Educ Couns* 2016; 99: 926–43.
- 27  
28  
29 390 9. Pillay J, Armstrong MJ, Butalia S, et al. Behavioral programmes for type 2 diabetes  
30  
31 391 mellitus: A systematic review and network meta-analysis. *Ann Intern Med* 2015;  
32  
33 392 163: 848.
- 34  
35  
36 393 10. Doyle G, O'Donnell S, Quigley E, et al. Patient level cost of diabetes self-  
37  
38 394 management education programmes: an international evaluation. *BMJ Open* 2017; 7:  
39  
40 395 e013805.
- 41  
42  
43 396 11. Fisher EB, Boothroyd RI, Elstad EA, et al. Peer support of complex health behaviors  
44  
45 397 in prevention and disease management with special reference to diabetes: Systematic  
46  
47 398 reviews. *Clin Diabetes Endocrinol* 2017; 3. DOI:10.1186/s40842-017-0042-3.
- 48  
49 399 12. Dale JR, Williams SM, Bowyer V. What is the effect of peer support on diabetes  
50  
51 400 outcomes in adults? A systematic review. *Diabet Med* 2012; 29: 1361–77.  
52  
53  
54 401

- 1  
2  
3 402 13. Norris SL, Chowdhury FM, Van Le K, et al. Effectiveness of community health  
4  
5 403 workers in the care of persons with diabetes. *Diabet Med J Br Diabet Assoc* 2006;  
6  
7 404 23: 544–56.  
8  
9  
10 405 14. World Health Organization. Peer support programmes in diabetes: report of a WHO  
11  
12 406 consultation 5-7 November 2007. Geneva, Switzerland: WHO, 2008.  
13  
14  
15 407 15. Fisher EB, Boothroyd RI, Coufal MM, et al. Peer support for self-management of  
16  
17 408 diabetes improved outcomes in international settings. *Health Aff (Millwood)* 2012;  
18  
19 409 31: 130–9.  
20  
21  
22 410 16. Trento M, Gamba S, Gentile L, et al. Rethink Organization to iMprove Education  
23  
24 411 and Outcomes (ROME0): A multicenter randomized trial of lifestyle intervention by  
25  
26 412 group care to manage type 2 diabetes. *Diabetes Care* 2010; 33: 745–7.  
27  
28  
29 413 17. Werfalli M, Raubenheimer P, Engel M, et al. Effectiveness of community-based  
30  
31 414 peer-led diabetes self-management programme (COMP-DSMP) for improving  
32  
33 415 clinical outcomes and quality of life of adults with diabetes in primary care settings  
34  
35 416 in low and middle-income countries (LMIC): A systematic review and meta-analysis.  
36  
37 417 *BMJ Open* 2015; 5: e007635.  
38  
39  
40 418 18. Keeratiyutawong P, Hanucharunkl S, Melkus G, Vorapongsathon OPT.  
41  
42 419 Effectiveness of a self-management programme for Thais with type 2 diabetes. *Thai*  
43  
44 420 *J Nurs Res* 2006; 10: 85–97.  
45  
46  
47 421 19. Craig P, Dieppe P, Macintyre S, Michie S, Nazareth I, Petticrew M. Developing and  
48  
49 422 evaluating complex interventions: the new Medical Research Council guidance. *BMJ*  
50  
51 423 2008; a1655.  
52  
53  
54  
55  
56  
57  
58  
59

- 1  
2  
3 424 20. Wattana C, Srisuphan W, Pothiban L, Upchurch SL. Effects of a diabetes self-  
4  
5 425 management programme on glycaemic control, coronary heart disease risk, and  
6  
7 426 quality of life among Thai patients with type 2 diabetes. *Nurs Health Sci* 2007; 9:  
8  
9 427 135–41.
- 10  
11  
12 428 21. Wan EYF, Fung CSC, Wong CKH, Chin WY, Lam CLK. Association of  
13  
14 429 hemoglobin A1c levels with cardiovascular disease and mortality in Chinese patients  
15  
16 430 with diabetes
- 17  
18  
19 431 22. Khunti K, Gray LJ, Skinner T, et al. Effectiveness of a diabetes education and self-  
20  
21 432 management programme (DESMOND) for people with newly diagnosed type 2  
22  
23 433 diabetes mellitus: Three-year follow-up of a cluster randomised controlled trial in  
24  
25 434 primary care. *BMJ* 2012; 344: e2333–e2333.
- 26  
27  
28 435 23. Tuong W, Larsen ER, Armstrong AW. Videos to influence: A systematic review of  
29  
30 436 effectiveness of video-based education in modifying health behaviors. *J Behav Med*  
31  
32 437 2014; 37: 218–33.
- 33  
34  
35 438 24. Moore GF, Audrey S, Barker M, et al. Process evaluation of complex interventions:  
36  
37 439 Medical Research Council guidance. *BMJ* 2015; 350: h1258–h1258.
- 38  
39  
40 440 25. Kimman M, et al. Validity of the Thai EQ-5D in an occupational population in  
41  
42 441 Thailand. *Qual Life Res* 2013 Aug; 22(6):1499-506.
- 43  
44  
45 442 26. Clinical Practice Guidelines for Diabetes. Diabetes Association of Thailand, 2017.  
46  
47 443 ([https://www.dmthai.org/index.php/knowledge/healthcare-providers/cpg/443-](https://www.dmthai.org/index.php/knowledge/healthcare-providers/cpg/443-guideline-diabetes-care-2017)  
48  
49 444 [guideline-diabetes-care-2017](https://www.dmthai.org/index.php/knowledge/healthcare-providers/cpg/443-guideline-diabetes-care-2017))
- 50  
51 445 27. Aekplakorn A, Bunnag P, Woodward M. et al. Risk score for predicting incident  
52  
53 446 diabetes in the Thai population. *Diabetes Care* 2006 Aug; 29(8):1872-1877

- 1  
2  
3 447 28. Mahatnirunkul S, Tuntipivanaskul W, Pumpisanchai W, et al. Comparison of the  
4  
5 448 WHOQOL-100 and the WHOQOL-BREF. *Journal of Mental Health of Thailand*  
6  
7 449 1998; 5: 4-15.  
8  
9  
10 450 29. Nilchaikovit T. et al. Development of Thai version of hospital anxiety and depression  
11  
12 451 scale in cancer patients. *J Psychiatr Assoc Thailand* 1996; 41(1):18-30.  
13  
14 452 30. Wongpakaran N, Wongpakaran T. The Thai version of the PSS-10: An investigation  
15  
16 453 of its psychometric properties. *BioPsychoSocial Medicine* 2010: 4:6  
17  
18 454 31. Rattanawiwatpong P, et al. Validity and reliability of the Thai version of Short  
19  
20 455 Format International Physical Activity Questionnaire (IPAQ). *J Thai Rehabil* 2006;  
21  
22 456 16(3):147-160.  
23  
24 457 32. Leelacharas S, et al. Illness perceptions, lifestyle behaviours, social support and  
25  
26 458 cardiovascular risks in people with Hypertension in Urban and Rural Areas of  
27  
28 459 Thailand. *Pacific Rim Int J Nur Res* 2015; 19  
29  
30 460 33. Lamsumang, W. The development of the Thai version of the diabetes management  
31  
32 461 self-efficacy scale (T-DMSES) for older adults with type 2 diabetes. State University  
33  
34 462 of New York at Buffalo, New York; 2009.  
35  
36 463 34. Sangruangake M, Jirapornkul C, Hurst C. Psychometric properties of diabetes  
37  
38 464 management self-efficacy in Thai type 2 diabetes mellitus patients: A multicenter  
39  
40 465 study. *Int J Endocrinol*. 2017;2017:2503156. doi:10.1155/2017/2503156)  
41  
42 466 35. Keeratiyatawong, P, Hanucharumkul, S., Melkus, G. D. E., Panpakdee, O.,  
43  
44 467 Vorapongsathorn T. Effectiveness of a self-management programme for Thais with  
45  
46 468 type 2 diabetes. *Thai J Nurse Res*. 2006; 10: 85-97  
47  
48  
49  
50  
51  
52  
53  
54  
55  
56  
57  
58  
59  
60



- 1  
2  
3 469 36. Manit A, et al. Development of needs and resources for self-management assessment  
4  
5 470 instrument in Thais with type 2 diabetes: Cross-cultural adaptation. *J Med Assoc*  
6  
7 471 *Thai* 2011; Vol. 94 No. 11.  
8  
9  
10 472 37. Meakin R and Weinman J. The 'Medical Interview Satisfaction Scale' (MISS-21)  
11  
12 473 adapted for British general practice. *Family Practice* 2002; 19:257–263.  
13  
14  
15 474

For peer review only

1  
2  
3  
4  
5  
6  
7  
8  
9  
10  
11  
12  
13  
14  
15  
16  
17  
18  
19  
20  
21  
22  
23  
24  
25  
26  
27  
28  
29  
30  
31  
32  
33  
34  
35  
36  
37  
38  
39  
40  
41  
42  
43  
44  
45  
46  
47  
48  
49  
50  
51  
52  
53  
54  
55  
56  
57  
58  
59  
60

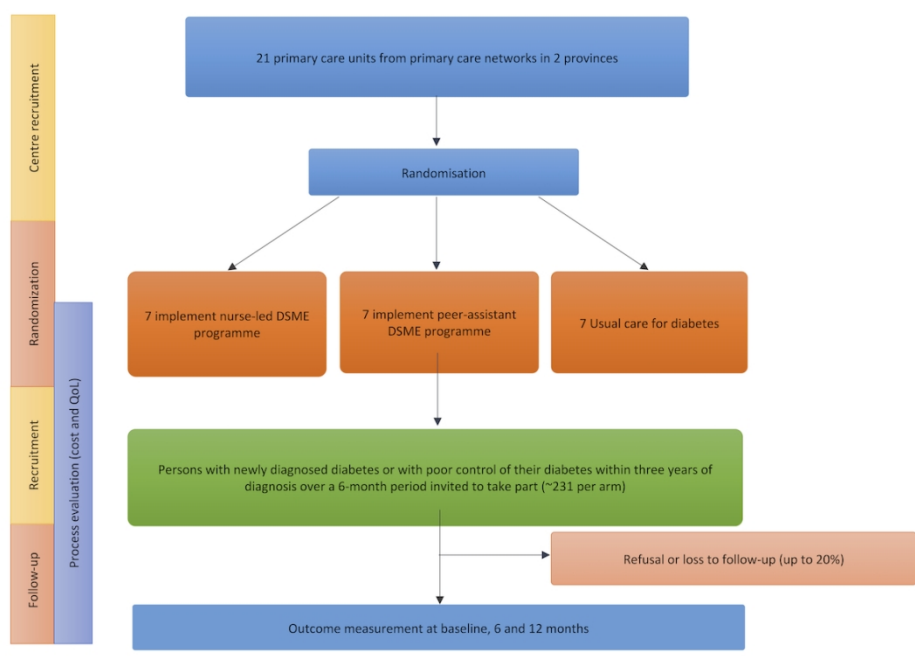

Figure 1: Trial flow diagram  
27x20mm (1200 x 1200 DPI)

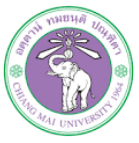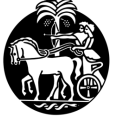

## Participant Information Sheet

### Title of Project: Delivering Diabetes Self-Management Education in Thailand

#### Introduction

We would like to invite you to take part in a research study. Joining the study is entirely up to you. Before you decide, you need to understand why the research is being done and what it would involve. One of our team will go through this information sheet with you, and answer any questions you may have. Ask questions if anything you read is not clear or you would like more information. Please feel free to talk to others about the study if you wish. Take time to decide whether or not to take part.

#### What is the purpose of the study?

The London School of Hygiene and Tropical Medicine (LSHTM) are conducting research for people with type 2 diabetes in Chiang Mai Thailand who have recently been diagnosed. The purpose of this study is to provide diabetes self-management education (DSME) by trained nurses and peer health care volunteers for those recently diagnosed.

This is a 3 arm cluster randomised trial where your service provider has been randomised to one of the following 3 interventions: 1) usual treatment 2) Nurse led DSME 3) Peer led DSME.

#### Why have I been asked to take part?

You have been invited because your healthcare provider is involved in the study and has identified you as being newly diagnosed with type 2 diabetes.

#### Do I have to take part?

No. It is up to you to decide to take part or not. If you don't want to take part, that's ok. Your doctor will still care for you and your decision will not affect the quality of care you receive.

We will discuss the study together and give you a copy of this information sheet. If you agree to take part, we will then ask you to sign a consent form.

#### What will happen to me if I take part?

#### Enrolling you in the study

If you are interested in taking part the research assistant will go through the information sheet with you. If you are happy with the information provided you may complete the consent form.

At this point you will also have the opportunity to raise with the researcher any questions you might have about the study. You do not have to enter the study unless you feel completely happy with what you are being asked to do.

#### A copy of this informed consent document to be offered to the participant

Study title: A scalable solution for delivery of Diabetes Self-Management Education in Thailand

Version & Date: V0.1 08/10/2018

Principal Investigator: Sanja Kinra

REC ref:

Participant Information Sheet For peer review only - <http://bmjopen.bmj.com/site/about/guidelines.xhtml> Page 1 of 5

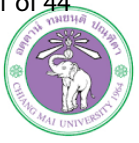

## **Participating in a diabetes education programme**

You will be invited to attend a diabetes self-management educational programme. This programme will consist of a number of sessions delivered as monthly meetings led by community health volunteers or nurses. Short films about living with diabetes will be shown to introduce key topics.

The education and skills training will be followed by an open discussion session to discuss common challenges and solutions, set lifestyle goals and seek advice.

## **Collecting information**

If you are happy to proceed with the study the researcher will then ask a series of questions relating to your health. This will be through completing a questionnaire booklet. These baseline questions will take about twenty minutes to complete. We will also take blood samples as the beginning of the study from trained phlebotomists.

Each participant will be compensated 200 baht for each of the baseline, 6 month and 12 month visit.

## **Follow up**

Six months and twelve months after you have entered the study we will contact you again to ask you a further set of questions and blood samples to see how you are feeling now.

## **How is taking part in the study different from usual care?**

Additional support and education may be provided through the study through the self-management education programme.

Whilst you are taking part in the study you will continue to be looked after by your healthcare providers, as normal. No treatment will be withheld from you during the course of this study.

The researcher will want you to complete some questionnaires at the beginning of the study and after six and twelve months. You may be asked to take part in an interview with a researcher.

## **What are the possible risks and disadvantages?**

It will take some time to complete the questionnaire, around twenty minutes to complete. If you agree to be further interviewed, then this will also mean time will be needed to attend the interview. You may find minor discomfort from the taking blood samples. We will have trained phlebotomists to take the blood sample.

## **What are the possible benefits?**

*We cannot promise the study will help you but the information we get from the study will help our knowledge and understanding of this research area within diabetes self-management education in Thailand.*

### **A copy of this informed consent document to be offered to the participant**

Study title: A scalable solution for delivery of Diabetes Self-Management Education in Thailand

Version & Date: V0.1 08/10/2018

Principal Investigator: Sanja Kinra

REC ref:

Participant Information Sheet For peer review only - <http://bmjopen.bmj.com/site/about/guidelines.xhtml> Page 2 of 5

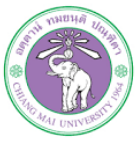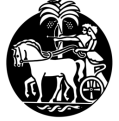

### What if something goes wrong?

If you have a concern about any aspect of this study, you should ask to speak to the researchers who will do their best to answer your questions <+66(0)616852307>. If you remain unhappy and wish to complain formally, you can do this by contacting <if LSHTM is the sponsor: Patricia Henley at [rgio@lshtm.ac.uk](mailto:rgio@lshtm.ac.uk) or +44 (0) 20 7927 2626>

The London School of Hygiene and Tropical Medicine holds insurance policies which apply to this study. If you experience harm or injury as a result of taking part in this study, you may be eligible to claim compensation.

### Can I change my mind about taking part?

Yes. You can withdraw from the study at any time. You just need to tell your doctor that you don't want to be in the study anymore. Your doctor will still care for you.

If you withdraw from the study we will destroy all your identifiable samples/ tape recorded interviews, but we will need to use the data collected on you up to your withdrawal

Or

You can withdraw from treatment but keep in contact with us to let us know your progress. Information collected may still be used. Any stored blood or tissue samples that can still be identified as yours will be destroyed if you wish, or will continue to be stored for further research.

### What will happen to information collected about me?

All information collected about you will be kept private. Only the study staff and authorities who check that the study is being carried out properly will be allowed to look at information about you. Data may be sent to other study staff in London or in Chiang Mai but this will be anonymised. This means that any information about you which leaves the hospital, will have your name and address removed so that you cannot be recognised.

Your doctor will send some details about you to the study team in Chiang Mai University who will store it securely. Your personal details will be kept in a different safe place to the other study information and will be destroyed within 10 years of the end of the study.

At the end of the project, the study data will be archived at Chiang Mai University. The data will be made available to other researchers worldwide for research and to improve medical knowledge and patient care. Your personal information will not be included and there is no way that you can be identified.

### What will happen to the results of this study?

The study results will be published in a medical journal so that other doctors can learn from them. Your personal information will not be included in the study report and there is no way that you can be identified from it.

### Who is organising and funding this study?

London School of Hygiene & Tropical Medicine is the sponsor for the research and they have full responsibility for the project including the collection, storage and analysis of your data.

This study is funded by the Medical Research Council UK and The Thailand Research Fund

### Who has checked this study?

All research involving human participants is looked at by an independent group of people, called a Research Ethics Committee, to protect your interests. This study has been reviewed and given favourable opinion by The London

#### A copy of this informed consent document to be offered to the participant

Study title: A scalable solution for delivery of Diabetes Self-Management Education in Thailand

Version & Date: V0.1 08/10/2018

Principal Investigator: Sanja Kinra

REC ref:

Participant Information Sheet For peer review only - <http://bmjopen.bmj.com/site/about/guidelines.xhtml> Page 3 of 5

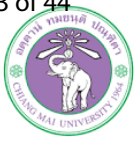

School of Hygiene and Tropical Medicine Research Ethics Committee (<ref: 16113>). The Research Ethics Committee, Faculty of Medicine, Chiang Mai University (No 326/2018) has also reviewed the study and have agreed that it is okay for us to ask people to take part.

### Further information and contact details

Thank you for taking time to read this information leaflet. If you think you will take part in the study please read and sign the consent form.

If you would like any further information, please contact Dr. Chaisiri Angkurawaranon, MD, who can answer any questions you may have about the study.

Contact details: Chaisiri Angkurawaranon, Department of Family Medicine, Faculty of Medicine, Chiang Mai University. Tel +66(0)616852307, Email: chaisiri.a@cmu.ac.th

### What happens if new information becomes available during the study?

Sometimes during a study, new information becomes available about the treatment being studied. If this happens, the research team will tell you and discuss whether you want to continue in the study. If you decide to stop taking part in the study your usual care will continue. If you decide to continue in the study you may be asked to sign an updated consent form. If we think you should withdraw from the study, we will explain the reasons and arrange for your care to continue.

### What happens when the study stops?

Very occasionally a study is stopped early. If this happens, the reasons will be explained to you.

### Tissue studies:

What will happen to the samples I give?

Blood samples will be used to measure HbA1c and lipids, coordinating where possible with the annual routine tests offered to patients to reduce duplication. Blood will be drawn by a trained phlebotomist when participants come for interview and sent to laboratory for analysis. Data will be linked to the participant information using a unique respondent ID, which will be assigned to all study participants.

Blood samples will be sent to a laboratory within the Chiang Mai area. The results of the blood tests will be provided to your health care professional who will discuss with you if there are any issues.

We may use some of the samples collected for future studies. These will be anonymised when stored, and all future research using these samples will be reviewed by an independent ethics committee.

### A copy of this informed consent document to be offered to the participant

Study title: A scalable solution for delivery of Diabetes Self-Management Education in Thailand

Version & Date: V0.1 08/10/2018

Principal Investigator: Sanja Kinra

REC ref:

Participant Information Sheet For peer review only - <http://bmjopen.bmj.com/site/about/guidelines.xhtml> Page 4 of 5

**CONSENT FORM FOR PARTICIPANT AND REPRESENTATIVE**

**Title of Project: A scalable solution for delivery of Diabetes Self-Management Education in Thailand**

**Name of PI/Researcher responsible for project: Chaisiri Angkurawaranon**

1  
2  
3  
4  
5

| Statement                                                                                                                                                                                                                                                                                                              | Please initial or thumbprint* each box |
|------------------------------------------------------------------------------------------------------------------------------------------------------------------------------------------------------------------------------------------------------------------------------------------------------------------------|----------------------------------------|
| I confirm that I have read and understood the information sheet dated 08.10.2018 (version 1.0) for the above named study. I have had the opportunity to consider the information, ask questions and have these answered satisfactorily.                                                                                |                                        |
| I understand that my consent is voluntary and that I am free to withdraw this consent at any time without giving any reason and without my medical care or legal rights being affected.                                                                                                                                |                                        |
| I understand that relevant sections of my/the participant's medical notes and data collected during the study may be looked at by authorised individuals from Chiang Mai University, where it is relevant to my taking part in this research. I give permission for these individuals to have access to these records. |                                        |
| I understand that data about/from me/the participant may be shared via a public data repository or by sharing directly with other researchers, and that I will not be identifiable from this information                                                                                                               |                                        |
| I understand that the tissue sample collected from me will be used to support other research in the future, and may be shared anonymously with other researchers, for their ethically-approved projects                                                                                                                |                                        |
| I give permission for a copy of this consent form, which contains my personal information, to be made available to the Trial Coordinating Centre for monitoring purposes only.                                                                                                                                         |                                        |
| I agree to my health care provider being informed of my participation in the study.                                                                                                                                                                                                                                    |                                        |
| I agree to me taking part in the above named study.                                                                                                                                                                                                                                                                    |                                        |

|  |  |  |
|--|--|--|
|  |  |  |
|--|--|--|

Printed name of participant/Representative      Signature of participant/Representative      Date  
(or thumbprint/mark if unable to sign)

|  |  |  |
|--|--|--|
|  |  |  |
|--|--|--|

Printed name of person obtaining consent      Signature of person obtaining consent      Date

The participant is unable to sign. As a witness, I confirm that all the information about the trial was given and the participant/representative consented to taking part *(\*only required if the participant/representative is unable to read or write)*

|  |  |  |
|--|--|--|
|  |  |  |
|--|--|--|

Printed name of impartial witness\*      Signature of impartial witness\*      Date

56  
57  
58  
59  
60

**A copy of this informed consent document has been provided to the participant.**

Centre Number:  
Study Number:  
Participant Identification Number:

## แบบขอรับความยินยอมเข้าร่วมโครงการ (Consent ข้อมูลสำหรับผู้ป่วย)

ชื่อโครงการศึกษาวิจัย : “การพัฒนาทางออกเพื่อการขยายการบริการที่เพิ่มความสามารถในการดูแลตนเองของผู้ที่เป็นเบาหวานในประเทศไทย”

หมายเลขโครงการศึกษาวิจัย : FAM-2561-05594

ผู้ให้ทุนสนับสนุนการวิจัย : สำนักงานคณะกรรมการส่งเสริมวิทยาศาสตร์ วิจัยและนวัตกรรม (สกสว.)

แพทย์ผู้วิจัยหลัก : อ.ดร.นพ.ชัยสิริ อังกระวรรณนท์

ท่านได้รับการเชิญให้เข้าร่วมการศึกษานี้เนื่องจากท่านได้รับการวินิจฉัยว่าเป็นโรคเบาหวานที่เพิ่งได้รับการวินิจฉัยมาไม่เกิน 1 ปี หรือเป็นผู้ป่วยเบาหวานที่ยังไม่สามารถควบคุมน้ำตาลได้ ขอให้ท่านกรุณาอ่านข้อมูลข้างล่างก่อน (หรือผู้วิจัยได้อ่านให้ท่านรับทราบ) หากท่านมีข้อข้องใจใดๆ เกี่ยวกับการศึกษานี้ และสิทธิของท่าน กรุณาซักถามจากแพทย์ผู้ทำการศึกษานี้ หรือ ผู้ช่วยแพทย์ที่ทำการศึกษานี้ ซึ่งจะเป็นผู้สามารถให้ความกระจ่างแก่ท่านได้ หากท่านตัดสินใจเข้าร่วมการศึกษานี้ ท่านจะได้รับเอกสารข้อมูลสำหรับผู้เข้าร่วมโครงการวิจัยและสำเนาใบยินยอมที่ท่านเซ็นชื่อกำกับเก็บไว้ 1 ฉบับ

### การศึกษานี้เกี่ยวกับเรื่องอะไร

เนื่องจากในปัจจุบันนี้มีผู้ป่วยเป็นโรคเบาหวานจำนวนมากขึ้น และพบว่าผู้ป่วยเป็นโรคเบาหวานนี้สัมพันธ์กับภาวะแทรกซ้อนทางสุขภาพมากมาย เพื่อให้เป็นประโยชน์ต่อการพัฒนาการดูแลรักษาผู้ป่วยเบาหวานในอนาคต ผู้วิจัยจึงสนใจที่จะศึกษาว่าการเป็นโรคเบาหวานนั้นสัมพันธ์กับการเปลี่ยนแปลงระดับชีวภาพในร่างกายอย่างไร โดยผ่านการตรวจเลือดและอุจจาระ และเพื่อศึกษาว่าการจัดทำโครงการให้ความรู้ในการดูแลตนเองของผู้ป่วยเบาหวานโดยใช้สื่อมัลติมีเดียเข้าช่วยเหลือมีผลลัพธ์ของการรักษาที่ดีขึ้นได้หรือไม่ การศึกษานี้จะรวบรวมผู้ป่วยประมาณ 600 ราย จากโรงพยาบาลชุมชนที่ให้การรักษาแบบปฐมภูมิ ในจังหวัดเชียงใหม่ และ ลำปาง

### ท่านจะต้องปฏิบัติตัวอย่างไร

หากท่านตัดสินใจเข้าร่วมการศึกษานี้ท่านจะถูกขอร้องให้เซ็นชื่อลงในใบยินยอมท่านจะได้รับการซักประวัติเกี่ยวกับโรคประจำตัวและการรักษาที่ได้รับ ได้ตรวจร่างกาย และการเจาะเลือด

เพื่อเป็นข้อมูลเริ่มต้นก่อนการรักษา โดยทั้งนี้ท่านจะได้รับการดูแลตามปกติควบคู่ไป

จากนั้นท่านจะได้รับการอบรมเพื่อพัฒนาศักยภาพในการดูแลตนเองในโรคเบาหวานของท่านโดยทีมดูแลสุขภาพ ซึ่งหน่วยบริการของท่านจะถูกสุ่มให้อยู่ 1 ใน 3 กลุ่ม อันได้แก่ กลุ่มทดลอง1 กลุ่มทดลอง2 และกลุ่มควบคุม โดยทั้ง 3 กลุ่มจะได้รับข้อมูลและการดูแลพื้นฐานเช่นเดียวกัน แต่แตกต่างกันในรูปแบบของการให้การอบรมในการดูแลตนเองของผู้ป่วยเบาหวาน ซึ่งจะใช้เวลาไม่นาน ไม่เกิน ครึ่งวัน โดย



- กลุ่มที่ 1 อบรมโดยบุคลากรทางการแพทย์ พยาบาล หรือ เจ้าหน้าที่สาธารณสุข
- กลุ่มที่ 2 อบรมโดยกลุ่มเพื่อนช่วยเพื่อนหรืออสม.ที่ผ่านการฝึกอบรมด้านการเพิ่มศักยภาพในการดูแลตนเองในโรคเบาหวาน
- กลุ่มที่ 3 ได้รับความรู้จากการดูแลตามมาตรฐานของกระทรวงสาธารณสุข

ซึ่งทั้งสามกลุ่ม จะมีการนัด หรือ ติดตาม ความก้าวหน้าพฤติกรรม的自我ดูแลตนเอง ทุกๆ 1-3 เดือน

การติดตามผลเลือดและตอบแบบสอบถาม จะถูกทำในครั้งแรกข้างต้น และอีก 2 ครั้ง คือ ที่ 6 เดือนและที่ 12 เดือนนับจากครั้งแรกที่อบรม โดยทั้ง 3 ครั้ง ท่านจะถูกเจาะเลือดเพื่อส่งตรวจปริมาตรทั้งสิ้นครั้งละ 40 มิลลิลิตร

### ความเสี่ยงจากการเข้าร่วมการวิจัยนี้

ความเสี่ยงจากการเจาะเลือด - ท่านอาจรู้สึกหน้ามืด เป็นลม ปวดบริเวณที่เจาะ หรือมีจ้ำเลือดบริเวณที่เจาะ มีความเสี่ยงน้อยมากที่จะเกิดการติดเชื้อจากการเจาะเลือดเพราะเราใช้เข็มเจาะเลือดที่ปราศจากเชื้อและใช้ครั้งเดียวทิ้ง การเจาะเลือดทั้งหมดอยู่ในสถานพยาบาล และหากมีปัญหาจะได้รับการดูแลทันที

### ท่านจะได้ประโยชน์อะไรจากการศึกษา

ท่านจะได้รับความรู้เพื่อนำไปใช้ในการดูแลตนเองเพื่อควบคุมโรคเบาหวานของท่าน และผลสรุปที่ได้จากการศึกษานี้จะเป็นประโยชน์ต่อผู้ป่วยรายอื่นในอนาคต

### ค่าใช้จ่ายในการเข้าร่วมวิจัย

ท่านจะไม่ต้องเสียค่าใช้จ่ายเพิ่มเติมเกี่ยวกับการวิจัยนอกเหนือจากค่ารักษาปกติที่ควรจะเป็นซึ่งท่านสามารถใช้สิทธิในการเบิกจ่ายได้ตามสิทธิการรักษาปกติของท่าน

### ค่าตอบแทน

สำหรับการมาตรวจติดตามที่เพิ่มจากการตรวจรักษาตามปกติ จำนวน 5 ครั้ง ซึ่งจะมีการตรวจเลือด รวม 3 ครั้ง ท่านจะได้รับค่าเดินทางและค่าเสียเวลาครั้งละ 100 บาท (รวม 500 บาทต่อคน ตลอดระยะเวลาโครงการ 1 ปี)

## หากท่านได้รับบาดเจ็บจากการเข้าร่วมการศึกษาวิจัย

หากท่านได้ปฏิบัติตามคำแนะนำของแพทย์ผู้วิจัยแล้ว กระบวนการต่าง ๆ ในการวิจัยทำให้ท่านได้รับบาดเจ็บ เมื่อผู้วิจัยได้รับแจ้งจากท่าน ท่านจะได้รับการส่งต่อเพื่อรักษาภาวะดังกล่าวทันที

## ท่านจะอย่างไรหากท่านไม่ต้องการเข้าร่วมการศึกษาวิจัย หรือเปลี่ยนใจระหว่างร่วมศึกษาวิจัย

ท่านไม่จำเป็นต้องเข้าร่วมการศึกษาวิจัยนี้หากท่านไม่สมัครใจ หลังจากท่านตัดสินใจจะเข้าร่วมการศึกษาแล้ว ท่านสามารถจะถอนตัวได้ตลอดเวลา การตัดสินใจของท่านจะไม่มีผลต่อการรักษาในอนาคต หรือการดูแลอื่นใดหากท่านไม่ต้องการเข้าร่วมการศึกษาหรือต้องการหยุดการศึกษา ณ เวลาใดก็ตาม แพทย์ของท่านจะอธิบายให้ทราบถึงการรักษาอื่น ๆ ซึ่งเป็นทางเลือกที่มีอยู่ขณะนี้ ผู้วิจัยอาจจะตัดสินใจยกเลิกท่านจากการศึกษา หากเห็นว่าจะเป็นประโยชน์สำหรับท่านมากกว่า

## ใครจะรู้บ้างว่าท่านเข้าร่วมการศึกษานี้

แพทย์ประจำตัวท่าน (แพทย์เวชปฏิบัติทั่วไป) ควรจะได้รับทราบว่าท่านตัดสินใจเข้าร่วมการศึกษาวิจัยนี้ ข้อมูลของท่านที่ถูกบันทึกไว้ระหว่างการศึกษานี้ เช่นเดียวกับข้อมูลที่เกี่ยวข้องจากแฟ้มเวชระเบียนของโรงพยาบาล คลินิก บริษัทฯ หรือข้อมูลอื่น ๆ จะถูกเก็บไว้เป็นความลับตลอดเวลา คณะกรรมการจริยธรรมการวิจัยสามารถที่จะขอตรวจสอบข้อมูลเหล่านี้ได้ โดยข้อมูลเหล่านี้จะยังเก็บรักษาไว้เป็นเรื่องลับเฉพาะ

## การปกป้องรักษาข้อมูล : ข้อมูลใดบ้างที่จะถูกเก็บรวบรวมไว้จากการศึกษานี้

ข้อมูลที่ถูกเก็บรวบรวมนั้นจะมีเฉพาะในส่วนที่เกี่ยวข้องกับการศึกษาเพื่อวัตถุประสงค์ทางการวิจัยทางการแพทย์ โดยจะไม่มีการอ้างถึงข้อมูลส่วนตัวของท่าน อันได้แก่ชื่อท่าน ในรายงานหรือวารสารใด ๆ หากท่านตกลงใจเข้าร่วมการศึกษา ท่านยินยอมที่จะไม่จำกัดการให้ข้อมูลที่เป็นส่วนตัวยกเว้นในกรณีที่ขัดต่อสิทธิส่วนบุคคลภายใต้กฎหมายคุ้มครองสิทธิส่วนบุคคล

## หากท่านมีคำถามเกี่ยวกับการศึกษานี้ท่านสามารถติดต่อใครได้บ้าง

หากท่านมีคำถามหรือมีความวิตกกังวลเกี่ยวกับการศึกษาวิจัยนี้ หรือสงสัยว่าท่านกำลังได้รับบาดเจ็บจากการเข้าร่วมการวิจัยนี้ กรุณาติดต่อ คุณกุลญาภา อยู่นัด ได้ที่ ภาควิชาเวชศาสตร์ครอบครัว โทรศัพท์ที่ทำงาน 053-936362 (ในเวลาราชการ)

## ส่วนแสดงความยินยอม

โดยการลงนามในหนังสือยินยอมฉบับนี้ ท่านยอมรับว่าได้อ่านเอกสารฉบับนี้แล้วและได้รับคำอธิบายเกี่ยวกับการศึกษาวิจัยนี้ รวมถึงได้รับคำตอบเกี่ยวกับข้อสงสัยต่าง ๆ ที่ท่านมีจากผู้วิจัยแล้ว

1  
2  
3  
4  
5 ท่านตกลงใจที่จะเข้าร่วมในการศึกษาวิจัยนี้ และมีสิทธิ์ที่จะถอนตัวจากการศึกษาวิจัยนี้ได้ทุกเมื่อ โดยไม่มี  
6 ผลต่อการรักษาในอนาคต โดยการลงนามนี้ท่านไม่ได้สละสิทธิ์ใด ๆ ที่พึงมีทางกฎหมาย  
7  
8 ทั้งนี้ ท่านยินยอมที่จะเข้ารับการอบรมในโครงการวิจัย ตอบแบบสอบถามและ  
9  
10  
11  
12  
13

14 ลายมือชื่ออาสาสมัคร \_\_\_\_\_ วัน-เดือน-ปี \_\_\_\_\_

15  
16 ( \_\_\_\_\_ )  
17  
18

19  
20 ลายมือชื่อเจ้าหน้าที่ผู้ให้ข้อมูล \_\_\_\_\_ วัน-เดือน-ปี \_\_\_\_\_

21 ณ สถานพยาบาล

22  
23 ( \_\_\_\_\_ )  
24  
25

26 พยาน \_\_\_\_\_ วัน-เดือน-ปี \_\_\_\_\_

27  
28  
29 ( \_\_\_\_\_ )  
30  
31  
32  
33  
34  
35  
36  
37  
38  
39  
40  
41  
42  
43  
44  
45  
46  
47  
48  
49  
50  
51  
52  
53  
54  
55  
56  
57  
58  
59  
60

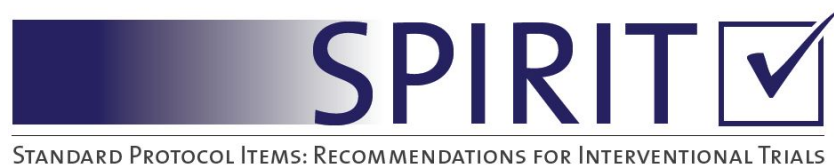

SPIRIT 2013 Checklist: Recommended items to address in a clinical trial protocol and related documents\*

| Section/item                      | ItemNo | Description                                                                                                                                                                                                                                                                              | Page/Line number         |
|-----------------------------------|--------|------------------------------------------------------------------------------------------------------------------------------------------------------------------------------------------------------------------------------------------------------------------------------------------|--------------------------|
| <b>Administrative information</b> |        |                                                                                                                                                                                                                                                                                          |                          |
| Title                             | 1      | Descriptive title identifying the study design, population, interventions, and, if applicable, trial acronym                                                                                                                                                                             | 1                        |
| Trial registration                | 2a     | Trial identifier and registry name. If not yet registered, name of intended registry                                                                                                                                                                                                     | Line 357                 |
|                                   | 2b     | All items from the World Health Organization Trial Registration Data Set                                                                                                                                                                                                                 | -                        |
| Protocol version                  | 3      | Date and version identifier                                                                                                                                                                                                                                                              | Lines 357-358            |
| Funding                           | 4      | Sources and types of financial, material, and other support                                                                                                                                                                                                                              | Lines 344-346            |
| Roles and responsibilities        | 5a     | Names, affiliations, and roles of protocol contributors                                                                                                                                                                                                                                  | Page 1 and Lines 338-342 |
|                                   | 5b     | Name and contact information for the trial sponsor                                                                                                                                                                                                                                       | Lines 359-360            |
|                                   | 5c     | Role of study sponsor and funders, if any, in study design; collection, management, analysis, and interpretation of data; writing of the report; and the decision to submit the report for publication, including whether they will have ultimate authority over any of these activities | Lines 344-353            |

|                                                           |    |                                                                                                                                                                                                                                                                  |                      |
|-----------------------------------------------------------|----|------------------------------------------------------------------------------------------------------------------------------------------------------------------------------------------------------------------------------------------------------------------|----------------------|
|                                                           | 5d | Composition, roles, and responsibilities of the coordinating centre, steering committee, endpoint adjudication committee, data management team, and other individuals or groups overseeing the trial, if applicable (see Item 21a for data monitoring committee) | Lines 322-326        |
| <b>Introduction</b>                                       |    |                                                                                                                                                                                                                                                                  |                      |
| Background and rationale                                  | 6a | Description of research question and justification for undertaking the trial, including summary of relevant studies (published and unpublished) examining benefits and harms for each intervention                                                               | Page 4 and 5         |
|                                                           | 6b | Explanation for choice of comparators                                                                                                                                                                                                                            | Lines 99-103         |
| Objectives                                                | 7  | Specific objectives or hypotheses                                                                                                                                                                                                                                | Lines 92-94, 217-226 |
| Trial design                                              | 8  | Description of trial design including type of trial (eg, parallel group, crossover, factorial, single group), allocation ratio, and framework (eg, superiority, equivalence, noninferiority, exploratory)                                                        | Lines 98-103         |
| <b>Methods: Participants, interventions, and outcomes</b> |    |                                                                                                                                                                                                                                                                  |                      |
| Study setting                                             | 9  | Description of study settings (eg, community clinic, academic hospital) and list of countries where data will be collected. Reference to where list of study sites can be obtained                                                                               | Lines 105-117        |
| Eligibility criteria                                      | 10 | Inclusion and exclusion criteria for participants. If applicable, eligibility criteria for study centres and individuals who will perform the interventions (eg, surgeons, psychotherapists)                                                                     | Lines 119-129        |

1  
2  
3  
4  
5  
6  
7  
8  
9  
10  
11  
12  
13  
14  
15  
16  
17  
18  
19  
20  
21  
22  
23  
24  
25  
26  
27  
28  
29  
30  
31  
32  
33  
34  
35  
36  
37  
38  
39  
40  
41  
42  
43  
44  
45  
46

|                      |     |                                                                                                                                                                                                                                                                                                                                                                                |               |
|----------------------|-----|--------------------------------------------------------------------------------------------------------------------------------------------------------------------------------------------------------------------------------------------------------------------------------------------------------------------------------------------------------------------------------|---------------|
| Interventions        | 11a | Interventions for each group with sufficient detail to allow replication, including how and when they will be administered                                                                                                                                                                                                                                                     | Lines 157-187 |
|                      | 11b | Criteria for discontinuing or modifying allocated interventions for a given trial participant (eg, drug dose change in response to harms, participant request, or improving/worsening disease)                                                                                                                                                                                 | n/a           |
|                      | 11c | Strategies to improve adherence to intervention protocols, and any procedures for monitoring adherence (eg, drug tablet return, laboratory tests)                                                                                                                                                                                                                              | Lines 192-197 |
|                      | 11d | Relevant concomitant care and interventions that are permitted or prohibited during the trial                                                                                                                                                                                                                                                                                  | n/a           |
| Outcomes             | 12  | Primary, secondary, and other outcomes, including the specific measurement variable (eg, systolic blood pressure), analysis metric (eg, change from baseline, final value, time to event), method of aggregation (eg, median, proportion), and time point for each outcome. Explanation of the clinical relevance of chosen efficacy and harm outcomes is strongly recommended | Lines 217-229 |
| Participant timeline | 13  | Time schedule of enrolment, interventions (including any run-ins and washouts), assessments, and visits for participants. A schematic diagram is highly recommended (see Figure)                                                                                                                                                                                               | Page 9-11     |

|                                                                     |     |                                                                                                                                                                                                                                                                                                                                                          |               |
|---------------------------------------------------------------------|-----|----------------------------------------------------------------------------------------------------------------------------------------------------------------------------------------------------------------------------------------------------------------------------------------------------------------------------------------------------------|---------------|
| Sample size                                                         | 14  | Estimated number of participants needed to achieve study objectives and how it was determined, including clinical and statistical assumptions supporting any sample size calculations                                                                                                                                                                    | Lines 140-148 |
| Recruitment                                                         | 15  | Strategies for achieving adequate participant enrolment to reach target sample size                                                                                                                                                                                                                                                                      | n/a           |
| <b>Methods: Assignment of interventions (for controlled trials)</b> |     |                                                                                                                                                                                                                                                                                                                                                          |               |
| Allocation:                                                         |     |                                                                                                                                                                                                                                                                                                                                                          |               |
| Sequence generation                                                 | 16a | Method of generating the allocation sequence (eg, computer-generated random numbers), and list of any factors for stratification. To reduce predictability of a random sequence, details of any planned restriction (eg, blocking) should be provided in a separate document that is unavailable to those who enrol participants or assign interventions | Lines 131-138 |
| Allocation concealment mechanism                                    | 16b | Mechanism of implementing the allocation sequence (eg, central telephone; sequentially numbered, opaque, sealed envelopes), describing any steps to conceal the sequence until interventions are assigned                                                                                                                                                | n/a           |
| Implementation                                                      | 16c | Who will generate the allocation sequence, who will enrol participants, and who will assign participants to interventions                                                                                                                                                                                                                                | n/a           |
| Blinding (masking)                                                  | 17a | Who will be blinded after assignment to interventions (eg, trial participants, care providers, outcome assessors, data analysts), and how                                                                                                                                                                                                                | n/a           |

|                                                           |     |                                                                                                                                                                                                                                                                                                                                                                                                              |                   |
|-----------------------------------------------------------|-----|--------------------------------------------------------------------------------------------------------------------------------------------------------------------------------------------------------------------------------------------------------------------------------------------------------------------------------------------------------------------------------------------------------------|-------------------|
|                                                           | 17b | If blinded, circumstances under which unblinding is permissible, and procedure for revealing a participant’s allocated intervention during the trial                                                                                                                                                                                                                                                         |                   |
| <b>Methods: Data collection, management, and analysis</b> |     |                                                                                                                                                                                                                                                                                                                                                                                                              |                   |
| Data collection methods                                   | 18a | Plans for assessment and collection of outcome, baseline, and other trial data, including any related processes to promote data quality (eg, duplicate measurements, training of assessors) and a description of study instruments (eg, questionnaires, laboratory tests) along with their reliability and validity, if known. Reference to where data collection forms can be found, if not in the protocol | Lines 228 Table 2 |
|                                                           | 18b | Plans to promote participant retention and complete follow-up, including list of any outcome data to be collected for participants who discontinue or deviate from intervention protocols                                                                                                                                                                                                                    | n/a               |
| Data management                                           | 19  | Plans for data entry, coding, security, and storage, including any related processes to promote data quality (eg, double data entry; range checks for data values). Reference to where details of data management procedures can be found, if not in the protocol                                                                                                                                            | Lines 264         |
| Statistical methods                                       | 20a | Statistical methods for analysing primary and secondary outcomes. Reference to where other details of the statistical analysis plan can be found, if not in the protocol                                                                                                                                                                                                                                     | Lines 277-285     |
|                                                           | 20b | Methods for any additional analyses (eg, subgroup and adjusted analyses)                                                                                                                                                                                                                                                                                                                                     | Lines 277-285     |



|                                 |     |                                                                                                                                                                                                                                                                                                                                       |           |
|---------------------------------|-----|---------------------------------------------------------------------------------------------------------------------------------------------------------------------------------------------------------------------------------------------------------------------------------------------------------------------------------------|-----------|
|                                 | 20c | Definition of analysis population relating to protocol non-adherence (eg, as randomised analysis), and any statistical methods to handle missing data (eg, multiple imputation)                                                                                                                                                       | n/a       |
| <b>Methods: Monitoring</b>      |     |                                                                                                                                                                                                                                                                                                                                       |           |
| Data monitoring                 | 21a | Composition of data monitoring committee (DMC); summary of its role and reporting structure; statement of whether it is independent from the sponsor and competing interests; and reference to where further details about its charter can be found, if not in the protocol. Alternatively, an explanation of why a DMC is not needed | Lines 322 |
|                                 | 21b | Description of any interim analyses and stopping guidelines, including who will have access to these interim results and make the final decision to terminate the trial                                                                                                                                                               | n/a       |
| Harms                           | 22  | Plans for collecting, assessing, reporting, and managing solicited and spontaneously reported adverse events and other unintended effects of trial interventions or trial conduct                                                                                                                                                     | n/a       |
| Auditing                        | 23  | Frequency and procedures for auditing trial conduct, if any, and whether the process will be independent from investigators and the sponsor                                                                                                                                                                                           | n/a       |
| <b>Ethics and dissemination</b> |     |                                                                                                                                                                                                                                                                                                                                       |           |
| Research ethics approval        | 24  | Plans for seeking research ethics committee/institutional review board (REC/IRB) approval                                                                                                                                                                                                                                             | Lines 364 |

|                               |     |                                                                                                                                                                                                                                  |               |
|-------------------------------|-----|----------------------------------------------------------------------------------------------------------------------------------------------------------------------------------------------------------------------------------|---------------|
| Protocol amendments           | 25  | Plans for communicating important protocol modifications (eg, changes to eligibility criteria, outcomes, analyses) to relevant parties (eg, investigators, REC/IRBs, trial participants, trial registries, journals, regulators) | Lines 319-320 |
| Consent or assent             | 26a | Who will obtain informed consent or assent from potential trial participants or authorised surrogates, and how (see Item 32)                                                                                                     | Lines 150-155 |
|                               | 26b | Additional consent provisions for collection and use of participant data and biological specimens in ancillary studies, if applicable                                                                                            | n/a           |
| Confidentiality               | 27  | How personal information about potential and enrolled participants will be collected, shared, and maintained in order to protect confidentiality before, during, and after the trial                                             | Lines 150-155 |
| Declaration of interests      | 28  | Financial and other competing interests for principal investigators for the overall trial and each study site                                                                                                                    | Lines 362-363 |
| Access to data                | 29  | Statement of who will have access to the final trial dataset, and disclosure of contractual agreements that limit such access for investigators                                                                                  | Lines 348-349 |
| Ancillary and post-trial care | 30  | Provisions, if any, for ancillary and post-trial care, and for compensation to those who suffer harm from trial participation                                                                                                    | n/a           |

|                            |     |                                                                                                                                                                                                                                                                                     |               |
|----------------------------|-----|-------------------------------------------------------------------------------------------------------------------------------------------------------------------------------------------------------------------------------------------------------------------------------------|---------------|
| Dissemination policy       | 31a | Plans for investigators and sponsor to communicate trial results to participants, healthcare professionals, the public, and other relevant groups (eg, via publication, reporting in results databases, or other data sharing arrangements), including any publication restrictions | Lines 328-336 |
|                            | 31b | Authorship eligibility guidelines and any intended use of professional writers                                                                                                                                                                                                      | n/a           |
|                            | 31c | Plans, if any, for granting public access to the full protocol, participant-level dataset, and statistical code                                                                                                                                                                     | n/a           |
| <b>Appendices</b>          |     |                                                                                                                                                                                                                                                                                     |               |
| Informed consent materials | 32  | Model consent form and other related documentation given to participants and authorised surrogates                                                                                                                                                                                  | Attached      |
| Biological specimens       | 33  | Plans for collection, laboratory evaluation, and storage of biological specimens for genetic or molecular analysis in the current trial and for future use in ancillary studies, if applicable                                                                                      | n/a           |

\*It is strongly recommended that this checklist be read in conjunction with the SPIRIT 2013 Explanation & Elaboration for important clarification on the items. Amendments to the protocol should be tracked and dated. The SPIRIT checklist is copyrighted by the SPIRIT Group under the Creative Commons "[Attribution-NonCommercial-NoDerivs 3.0 Unported](https://creativecommons.org/licenses/by-nc-nd/3.0/)" license.

# BMJ Open

## A Scalable Solution for Delivery of Diabetes Self-Management Education in Thailand (DSME-T): A Cluster Randomized Trial Study Protocol

|                                 |                                                                                                                                                                                                                                                                                                                                                                                                                                                                                                                                                                                                                                                                                                                                                                                                                                                                                                                                                                                                                                                                                                                                                                                                                                                   |
|---------------------------------|---------------------------------------------------------------------------------------------------------------------------------------------------------------------------------------------------------------------------------------------------------------------------------------------------------------------------------------------------------------------------------------------------------------------------------------------------------------------------------------------------------------------------------------------------------------------------------------------------------------------------------------------------------------------------------------------------------------------------------------------------------------------------------------------------------------------------------------------------------------------------------------------------------------------------------------------------------------------------------------------------------------------------------------------------------------------------------------------------------------------------------------------------------------------------------------------------------------------------------------------------|
| Journal:                        | <i>BMJ Open</i>                                                                                                                                                                                                                                                                                                                                                                                                                                                                                                                                                                                                                                                                                                                                                                                                                                                                                                                                                                                                                                                                                                                                                                                                                                   |
| Manuscript ID                   | bmjopen-2020-036963.R2                                                                                                                                                                                                                                                                                                                                                                                                                                                                                                                                                                                                                                                                                                                                                                                                                                                                                                                                                                                                                                                                                                                                                                                                                            |
| Article Type:                   | Protocol                                                                                                                                                                                                                                                                                                                                                                                                                                                                                                                                                                                                                                                                                                                                                                                                                                                                                                                                                                                                                                                                                                                                                                                                                                          |
| Date Submitted by the Author:   | 30-Aug-2020                                                                                                                                                                                                                                                                                                                                                                                                                                                                                                                                                                                                                                                                                                                                                                                                                                                                                                                                                                                                                                                                                                                                                                                                                                       |
| Complete List of Authors:       | Angkurawaranon, Chaisiri; Chiang Mai University, Department of Family Medicine, Faculty of Medicine<br>Papachristou Nadal, Iliatha; London School of Hygiene and Tropical Medicine, Faculty of Epidemiology and Population Health<br>Mallinson, Poppy; London School of Hygiene and Tropical Medicine Faculty of Epidemiology and Population Health, Department of Non-communicable Disease Epidemiology<br>Pinyopornpanish, Kanokporn; Chiang Mai University, Department of Family Medicine, Faculty of Medicine<br>Quansri, Orawan; Mahidol University<br>Rerkasem, Kittipan ; Chiang Mai University, Department of Surgery, Faculty of Medicine, Chiang Mai University; Chiang Mai University, Research Institute for Health Sciences<br>Srivanchakorn, Supattra; Royal Thai Government Ministry of Public Health<br>Techakehakij, Win; Lampang Hospital<br>Wichit, Nutchath; Surat Thani Rajabhat University<br>Pateekhum, Chanapat; Chiang Mai University<br>Hashmi, Ahmar; Chiang Mai University, Department of Family Medicine<br>Hanson, Kara; London School of Hygiene and Tropical Medicine<br>Khunti, Kamlesh; University of Leicester, Department of Health Sciences<br>Kinra, Sanjay; London School of Hygiene and Tropical Medicine |
| <b>Primary Subject Heading</b>: | Diabetes and endocrinology                                                                                                                                                                                                                                                                                                                                                                                                                                                                                                                                                                                                                                                                                                                                                                                                                                                                                                                                                                                                                                                                                                                                                                                                                        |
| Secondary Subject Heading:      | Evidence based practice, Diabetes and endocrinology, General practice / Family practice                                                                                                                                                                                                                                                                                                                                                                                                                                                                                                                                                                                                                                                                                                                                                                                                                                                                                                                                                                                                                                                                                                                                                           |
| Keywords:                       | DIABETES & ENDOCRINOLOGY, EDUCATION & TRAINING (see Medical Education & Training), Protocols & guidelines < HEALTH SERVICES ADMINISTRATION & MANAGEMENT                                                                                                                                                                                                                                                                                                                                                                                                                                                                                                                                                                                                                                                                                                                                                                                                                                                                                                                                                                                                                                                                                           |
|                                 |                                                                                                                                                                                                                                                                                                                                                                                                                                                                                                                                                                                                                                                                                                                                                                                                                                                                                                                                                                                                                                                                                                                                                                                                                                                   |

SCHOLARONE™  
Manuscripts

1  
2  
3  
4  
5  
6  
7  
8  
9  
10  
11  
12  
13  
14  
15  
16  
17  
18  
19  
20  
21  
22  
23  
24  
25  
26  
27  
28  
29  
30  
31  
32  
33  
34  
35  
36  
37  
38  
39  
40  
41  
42  
43  
44  
45  
46  
47  
48  
49  
50  
51  
52  
53  
54  
55  
56  
57  
58  
59  
60



I, the Submitting Author has the right to grant and does grant on behalf of all authors of the Work (as defined in the below author licence), an exclusive licence and/or a non-exclusive licence for contributions from authors who are: i) UK Crown employees; ii) where BMJ has agreed a CC-BY licence shall apply, and/or iii) in accordance with the terms applicable for US Federal Government officers or employees acting as part of their official duties; on a worldwide, perpetual, irrevocable, royalty-free basis to BMJ Publishing Group Ltd ("BMJ") its licensees and where the relevant Journal is co-owned by BMJ to the co-owners of the Journal, to publish the Work in this journal and any other BMJ products and to exploit all rights, as set out in our [licence](#).

The Submitting Author accepts and understands that any supply made under these terms is made by BMJ to the Submitting Author unless you are acting as an employee on behalf of your employer or a postgraduate student of an affiliated institution which is paying any applicable article publishing charge ("APC") for Open Access articles. Where the Submitting Author wishes to make the Work available on an Open Access basis (and intends to pay the relevant APC), the terms of reuse of such Open Access shall be governed by a Creative Commons licence – details of these licences and which [Creative Commons](#) licence will apply to this Work are set out in our licence referred to above.

Other than as permitted in any relevant BMJ Author's Self Archiving Policies, I confirm this Work has not been accepted for publication elsewhere, is not being considered for publication elsewhere and does not duplicate material already published. I confirm all authors consent to publication of this Work and authorise the granting of this licence.

1  
2  
3 **A Scalable Solution for Delivery of Diabetes Self-Management Education in Thailand**  
4  
5 **(DSME-T): A Cluster Randomized Trial Study Protocol**  
6

7 Chaisiri Angkurawaranon<sup>1\*</sup>, Iliatha Papachristou Nadal<sup>2,3</sup>, Poppy Alice Carson Mallinson<sup>2</sup>,  
8 Kanokporn Pinyopornpanish<sup>1</sup>, Orawan Quansri<sup>4</sup>, Kittipan Rerkasem<sup>5,6</sup>, Supattra Srivanichakorn<sup>7</sup>,  
9 Win Techakehakij<sup>8</sup>, Nutchath Wichit<sup>9</sup>, Chanapat Pateekhum<sup>1</sup>, Ahmar Hashmi<sup>1</sup>, Kara  
10 Hanson<sup>10</sup>, Kamlesh Khunti<sup>11</sup>, Sanjay Kinra<sup>2</sup>  
11  
12  
13  
14  
15

16  
17 **Author affiliations**  
18

19 <sup>1</sup> Department of Family Medicine, Faculty of Medicine, Chiang Mai University  
20

21 <sup>2</sup> Faculty of Epidemiology and Population Health, London School of Hygiene and Tropical  
22 Medicine  
23

24 <sup>3</sup> Psychological Medicines, King's College London  
25

26 <sup>4</sup> ASEAN Institute for Health Development, Mahidol University  
27

28 <sup>5</sup> Department of Surgery, Faculty of Medicine, Chiang Mai University  
29

30 <sup>6</sup> NCD Centre of Excellence, Research Institute for Health Sciences, Chiang Mai University  
31

32 <sup>7</sup> Department of Disease Control, Ministry of Public Health  
33

34 <sup>8</sup> Department of Social Medicine, Lampang Hospital  
35

36 <sup>9</sup> Faculty of Nursing, Suratthani Rajabhat University  
37

38 <sup>10</sup> Faculty of Public Health and Policy, London School of Hygiene and Tropical Medicine  
39

40 <sup>11</sup> Diabetes Research Center, University of Leicester  
41  
42  
43  
44  
45  
46  
47  
48

49 **Word count:** 3769 excluding references  
50

51 **Corresponding author:** Chaisiri Angkurawaranon, Department of Family Medicine, Faculty of  
52 Medicine, Chiang Mai University, email: [chaisiri.a@cmu.ac.th](mailto:chaisiri.a@cmu.ac.th)  
53  
54  
55  
56  
57  
58

## 1 **ABSTRACT**

2 **Introduction** Type 2 diabetes mellitus is amongst the foremost health challenges facing policy  
3 makers in Thailand as its prevalence has more than tripled over the last two decades, accounting  
4 for considerable death, disability and healthcare expenditure. Diabetes Self-Management  
5 Education (DSME) programmes show promise in improving diabetes outcomes, but this is not  
6 routinely utilised in Thailand. This study aims to test a culturally-tailored DSME model in  
7 Thailand, using a 3-arm cluster randomised controlled trial comparing a nurse-led model, a peer-  
8 assisted model, and standard care. We will test which model is effective and cost effective to  
9 improve cardiovascular risk and control of blood glucose among people with diabetes.

10  
11 **Methods and analysis** 21 primary care units in northern Thailand will be randomised to one of  
12 three interventions, enrolling a total of 693 patients. The primary care units will be randomised  
13 (1:1:1) to participate in a culturally-tailored DSME intervention for 12 months. The three-arm  
14 trial design will compare effectiveness of nurse-led, peer-assisted (Thai village health volunteers)  
15 and standard care. The primary trial outcomes are changes in haemoglobin A1c and  
16 cardiovascular risk score. A process evaluation and cost effectiveness evaluation will be  
17 conducted to produce policy relevant guidance for the Thai Ministry of Public Health. The  
18 planned trial period will start in January 2020 and finish October 2021.

19  
20 **Ethics and dissemination** Ethical approval has been obtained from Thailand and the UK. We  
21 will share our study data with other researchers, advertising via our publications and web  
22 presence. In particular, we are committed to sharing our findings and data with academic  
23 audiences in Thailand and other low- and middle-income countries.



1  
2  
3 24 **Trial registration number:**  
4

5 25 ClinicalTrials.gov ID NCT03938233  
6  
7

8 26 **Strengths and limitation of this study**  
9

- 10 27 • A three-arm cluster randomized controlled trial to evaluate clinical and cost-effectiveness  
11  
12 28 of a culturally tailored DSME under two alternative modes of delivery (nurse-led and  
13  
14 29 peer-assisted) will provide policy makers with options for scalability.  
15  
16  
17 30 • A culturally-tailored DSME programme has been developed with input from stakeholders  
18  
19 31 (policy makers, clinicians, nurses, village health volunteers and people with diabetes).  
20  
21  
22 32 • A series of short films has been developed to introduce key topics, as there is increasing  
23  
24 33 recognition that films are a highly efficient medium for communicating information,  
25  
26 34 particularly in low literacy settings  
27  
28  
29  
30  
31  
32  
33  
34  
35  
36  
37

## 38 INTRODUCTION

39 Type 2 diabetes mellitus (hereto referred to as diabetes) is amongst the foremost health  
40 challenges facing policy makers in Thailand. Its prevalence has more than tripled over the last  
41 two decades to an estimated 4 million adults (age adjusted prevalence 7.1%) living with diabetes  
42 in 2015.<sup>1,2</sup> Diabetes is associated with several macrovascular (e.g. ischaemic heart disease) and  
43 microvascular complications (e.g. nephropathy, retinopathy, neuropathy, and foot disease),  
44 which primarily account for the considerable death and disability (of which diabetes is the 5<sup>th</sup>  
45 leading cause in Thailand)<sup>3</sup>. In addition, diabetes in Thailand causes a two-fold increase in  
46 healthcare expenditure and significant loss of economic productivity—of both people with  
47 diabetes and their carers.<sup>1</sup>

48 The complications of diabetes can be largely prevented or delayed through lifestyle change and  
49 medication when necessary, and regular screening for early detection and management of  
50 complications to control risk factors such as blood glucose, lipids and blood pressure.<sup>4,5</sup> Under  
51 Thailand's universal health coverage, nearly everyone diagnosed with diabetes receives timely  
52 medical care (>97%) and has access to screening. Yet, surveys suggest that only about half of the  
53 people with diabetes achieve optimal control of risk factors or receive annual screening for  
54 microvascular complications (53-60%).<sup>1,6</sup> Limited data support a lack of engagement and self-  
55 management skills among those diagnosed with diabetes as the main underlying reasons for this.<sup>7</sup>  
56 Successful management of diabetes involves a considerable degree of self-management. People  
57 with diabetes need to adhere to multiple behaviours, including healthy lifestyles, regular  
58 monitoring and medication, problem-solving and healthy coping strategies. In this, they are  
59 greatly supported by diabetes self-management education (DSME), defined as 'a collaborative  
60 and ongoing process intended to facilitate the development of knowledge, skills, and abilities  
61 that are required for successful self-management of diabetes'.<sup>8</sup> Evidence from over 100 studies,

1  
2  
3 62 including many randomised controlled trials conducted predominantly in high-income countries,  
4  
5 63 suggests that DSME programmes are associated with improvements in a range of behavioural  
6  
7 64 outcomes (knowledge, behaviours, self-efficacy, psychosocial), and clinical outcomes  
8  
9  
10 65 (physiological risk factors, screening for complications, quality of life),<sup>9,10</sup> and are cost-  
11  
12 66 effective.<sup>11</sup> Therefore, DSME programmes are recommended by most clinical guidelines.<sup>8</sup>  
13  
14  
15 67 However, there is considerable heterogeneity in the effectiveness of DSME programmes<sup>9,10</sup>.  
16  
17 68 Programmes that are more effective usually offer more than 10 hours of contact between trainers  
18  
19 69 and patients, incorporate behavioural approaches and provide longer-term support mechanisms.  
20  
21 70 However, providing intensive and sustained support has cost implications, resulting in ongoing  
22  
23 71 efforts to identify more cost-efficient ways to deliver DSME, notably through use of lay health  
24  
25 72 workers or peer educators, such as Thai village health volunteers (VHV).  
26  
27  
28 73 Peers can support sustained changes in complex health behaviours by providing assistance in  
29  
30 74 daily management, social and emotional support, linkage to clinical care, and ongoing  
31  
32 75 availability of support.<sup>12,13</sup> Unlike the educational/psychological framework of professional  
33  
34 76 support, peer support operates on a social support framework. Although traditionally restricted to  
35  
36 77 those with experience of disease, the definition of peers has been expanded to include other non-  
37  
38 78 professionals with a close relationship with the community (e.g. VHV).<sup>14</sup> However, despite  
39  
40 79 widespread interest, empirical data on effectiveness of peers in supporting behaviour change in  
41  
42 80 chronic diseases, including diabetes, is limited and inconsistent.<sup>15,16</sup> In an earlier review, the  
43  
44 81 World Health Organisation did not find sufficient evidence to recommend peer support  
45  
46 82 programmes as a policy option for diabetes management in LMICs.<sup>17</sup> Whereas many studies on  
47  
48 83 the effectiveness of DSME programmes come from high-income countries (HIC), there is a  
49  
50 84 dearth of data from LMIC settings on cost-effectiveness, acceptability and potential adverse  
51  
52  
53  
54  
55  
56  
57  
58  
59  
60

1  
2  
3 85 consequences of peer support programmes, as well as optimal strategies for mobilising and  
4  
5 86 integrating peers in diabetes care pathways.<sup>13,18-19</sup>  
6

7  
8 87 In the Thai healthcare system, structured DSME is not routinely available. While several small-  
9  
10 88 scale studies from Thailand have demonstrated that DSME can strengthen self-management of  
11  
12 89 diabetes, negative perceptions of educational programmes and concerns about the burden on  
13  
14 90 existing staff time and costs, have so far prevented the introduction of DSME.<sup>1,19</sup> However,  
15  
16 91 recent policy developments in Thailand are supportive of DSME introduction, if a scalable  
17  
18 92 model can be found. We therefore hypothesise that a nurse-led and/or peer-assisted model for  
19  
20 93 DSME delivery will be effective in improving blood glucose among people with diabetes, with  
21  
22 94 the peer-assisted model being the more scalable option for the Thai healthcare system. We  
23  
24 95 propose to evaluate this through a three-arm cluster randomised controlled trial.  
25  
26  
27  
28  
29  
30

## 31 97 **METHODS AND ANALYSIS**

### 32 33 98 **Study design**

34  
35 99 This study is an MRC complex intervention,<sup>20</sup> three-arm cluster randomised controlled trial.  
36  
37 100 Primary care units from within two provinces: Chiang Mai and Lampang will be randomised for  
38  
39 101 patients to receive either the nurse-led or peer-assisted DSME intervention or standard care (brief  
40  
41 102 education session by a nurse). Assessments will be undertaken at baseline, 6- and 12-month  
42  
43 103 follow up. A process and cost-effective evaluation will also be conducted.  
44  
45  
46  
47  
48

### 49 105 **Setting and Participant Selection**

50  
51 106 Potential participants requiring a DSME intervention will be recruited from 21 primary care units  
52  
53 107 in Chiang Mai (7 primary care units) and Lampang provinces (14 primary care units) in northern  
54  
55  
56  
57  
58  
59  
60

1  
2  
3 108 Thailand. Chiang Mai is a province of over 1.4 million people with 24 district hospitals and  
4  
5 109 about 250 primary care units. Lampang is a province of approximately 700,000 people with 12  
6  
7  
8 110 district hospitals and about 140 primary care units. While diabetes is diagnosed at tertiary and  
9  
10 111 district hospitals, it is managed at the primary care unit health centres, which are served by a full-  
11  
12 112 time nurse (doctor visits weekly), and 10-15 village health volunteers (VHV) linking patients in  
13  
14 113 the community.

15  
16  
17 114 From clinical records, we will recruit all new referrals for diabetes management and patients  
18  
19 115 with uncontrolled diabetes diagnosed in the past 3 years at the 21 primary care units over a 9-  
20  
21 116 month period (N=693). Posters and information sheets will be used to provide necessary, trial-  
22  
23 117 related information to prospective participants (Figure 1).

24  
25  
26 118

27  
28 119 Participants presenting to one of the 21 primary care units will be included if they are:

- 29  
30  
31 120 1. Over 18 years of age with a new referral for type 2 diabetes management;  
32  
33 121 2. Over 18 years of age with uncontrolled diabetes ( $HbA1c > 7\%$ ) within the first three  
34  
35 122 years of diagnosis;  
36  
37  
38 123 2. Willing and able to attend educational group meetings; and  
39  
40 124 3. Available for 6- and 12-month follow-up visits

41  
42 125 Participants will be excluded if they:

- 43  
44 126 1. Have advanced diabetic complications such as diabetic nephropathy, diabetic  
45  
46 127 retinopathy, or amputations; or if they are pregnant as patients with these conditions and  
47  
48 128 co-morbidities are usually referred to secondary care facilities for treatment in Thailand  
49  
50  
51 129 and not often managed in primary care where this trial is conducted.  
52  
53  
54 130 2. Have learning disabilities, dementia or active severe mental illness; or

1  
2  
3 131 3. Lack the capacity to give voluntary, informed consent.  
4  
5  
6 132

7  
8 133 **Randomisation**

9  
10 134 Stratified by province, 21 primary care units (7 from Chiang Mai and 14 from Lampang) will be  
11  
12 135 randomised to provide one of three interventions: (1) nurse-led DSME; (2) nurse-led DSME with  
13  
14 136 peer assistance (provided by Thai village health volunteers, VHV); or (3) standard care (brief  
15  
16 137 education session by a nurse), resulting in seven primary care units in each arm of the study. All  
17  
18 138 primary care units follow protocols for diabetes management as outlined by national guidelines.  
19  
20 139 Stratification by province will minimise any variation in practice between the different primary  
21  
22 140 care units.  
23  
24  
25  
26 141

27  
28 142 **Sample size calculation**

29  
30 143 The trial is powered to detect a difference in HbA1c of 0.6% (SD 1.5%) between control and  
31  
32 144 intervention arms, based on the effect size of 0.6% noted in a previous diabetes management  
33  
34 145 study in Thailand<sup>21</sup>, and the fact that an increase in HbA1c of ~0.5% was associated with  
35  
36 146 increased mortality among people with diabetes<sup>22</sup>. An ICC between primary care units of 0.02  
37  
38 147 was assumed based on a similar study which found that the intraclass correlation for HbA1c at  
39  
40 148 three years was 0.02 (95% confidence interval 0.00 to 0.08)<sup>23</sup>. Allowing for a loss-to-follow up  
41  
42 149 rate of 20%, 693 participants are needed from 21 primary care units (7 in each trial arm arm) to  
43  
44 150 achieve 80% power at 2.5% significance level.  
45  
46  
47  
48  
49

50 151

51  
52 152 **Informed consent**  
53  
54  
55  
56  
57  
58  
59  
60

1  
2  
3 153 Written informed consent will be obtained from all study participants in Thai before any study  
4  
5 154 procedures are undertaken including enrolment, intervention allocation, follow-up interviews and  
6  
7  
8 155 blood draws. Local research assistants will explain the study to patients using the patient  
9  
10 156 information sheet (supplementary file). The right of the patient to refuse to participate without  
11  
12 157 giving reasons will be respected.  
13  
14  
15 158

### 17 159 **Intervention description and delivery**

19 160 The DSME programme has been developed using a structured process. This included a desk and  
20  
21 161 literature review and focus groups with local nurses and VHV to develop a paper prototype of  
22  
23 162 the intervention, including a hypothesised pathway of action (e.g. common-sense model of  
24  
25 163 illness, empowerment, discovery learning, social learning, and social support) and a training  
26  
27 164 manual for nurses and VHV. In addition, seven brief films (5-6 minutes long) have been  
28  
29 165 developed and have been used to trigger discussions on key topic areas during DSME  
30  
31 166 intervention meetings covering such topics as medical adherence, dietary recommendation,  
32  
33 167 physical activity and stress management. Films will be used in the intervention as they are  
34  
35 168 increasingly recognised as a highly effective medium for improved recall when communicating  
36  
37 169 large amounts of information, particularly in low literacy settings.<sup>24</sup> Films will be in the local  
38  
39 170 language and use local people.  
40  
41  
42  
43  
44  
45 171

47 172 Our DSME programme will consist of four modules. Module 1 covers the general overview of  
48  
49 173 diabetes, treatment targets and goal setting. Module 2 covers diet and nutrition. Module 3 covers  
50  
51 174 physical activity and exercise, while module 4 covers stress management and mental health.  
52  
53  
54  
55  
56  
57  
58  
59  
60

1  
2  
3 175 Each module takes approximately 1.5 hours. Each participant is given an information and self-  
4  
5 176 assessment booklet which covers all content and materials for the four modules.  
6  
7  
8 177 In addition to routine care, in the nurse-led arm, the nurse will deliver the DSME to groups of 5-  
9  
10 178 10 participants per session within the first months after enrolment. The participants in the nurse-  
11  
12  
13 179 led arm will also be given a refresher session going over all 4 modules again at 6 months after  
14  
15 180 enrolment. For the peer-assisted arm, a VHV will participate as an assistant to the nurse in the  
16  
17 181 first DSME session. However, the VHV will lead the refresher course at 6 months. In addition,  
18  
19 182 participants in the peer-assisted arm will receive monthly contact with the VHV either via a  
20  
21  
22 183 home visit or telephone call. During these brief 15-20 minute monthly contacts, VHV will ask  
23  
24 184 about the progress made, providing encouragement if plans for self-management are being  
25  
26 185 followed or discussing ways to overcome barriers and set new goals if obstacles are identified.  
27  
28  
29 186 Contents of the three trial arms are summarized in Table 1.  
30  
31  
32  
33  
34  
35  
36  
37  
38  
39  
40  
41  
42  
43  
44  
45  
46  
47  
48  
49  
50  
51  
52  
53  
54  
55  
56  
57  
58  
59  
60



187 **Table 1:** Summary of DSME delivery in the three trial arms

| Month | Routine care       | Nurse-led DSME                                       | Peer-assisted DSME*                                                   |
|-------|--------------------|------------------------------------------------------|-----------------------------------------------------------------------|
| 0     | Individual session | Nurse provides DSME<br>(4 modules)                   | Nurse provides DSME<br>(4 modules) with VHV<br>to assist the sessions |
| 6     | Individual session | Refresher course<br>(4 modules) provided by<br>nurse | Refresher course<br>(4 modules) led by VHV                            |
| 12    | Outcome assessment | Outcome assessment                                   | Outcome assessment                                                    |

188 \* participants in the peer-assistant arm will additionally receive monthly contact with the VHV  
 189 either via a home visit or telephone call.

190  
 191 The intervention will be piloted at four community primary care units with four nurses and four  
 192 VHV who will be trained to deliver the DSME programme to groups of 5-10 persons with  
 193 diabetes. This will allow for refining the intervention, ensuring data collection can be completed  
 194 as specified, and to check our assumptions and processes for the trial. For the main trial, a two-  
 195 day workshop will be held such that at least one nurse and one VHV from each primary care unit  
 196 will be trained by the Thai research team to deliver the DSME programme at the community  
 197 primary care unit or neighbourhoods as appropriate. The trial coordinator will conduct periodic  
 198 site visits as additional training as requested and a line of communication will be established  
 199 between the research team and each site to answer any issues which may arise.

200

1  
2  
3 201 A process evaluation using qualitative methods will be conducted during the trial period and at  
4  
5 202 the end of the study. Observations including video recordings of intervention delivery will be  
6  
7 203 made. We plan to conduct 5-10 focus groups among providers (nurses and VHV) to explore  
8  
9 204 healthcare professionals' perspectives regarding their experience and implementation of the  
10  
11 205 DSME programme, including views on the cultural transferability of DSME and scalability to  
12  
13 206 the Thai context. In addition, we plan to conduct 20 structured interviews with patients. These  
14  
15 207 evaluations will help assess intervention delivery (fidelity, dose and reach), clarify causal  
16  
17 208 mechanisms (those hypothesised by theory of change developed within the project or emergent  
18  
19 209 mechanisms identified), and detail contextual factors (barriers, facilitators) associated with  
20  
21 210 variation in outcomes.<sup>25</sup> The process evaluation will also consist of one-to-one interviews with  
22  
23 211 clinicians and policy makers and direct observations of patients. Data for economic evaluations  
24  
25 212 (resource usage and quality of life using EQ-5D<sup>26</sup>) will be obtained prospectively alongside the  
26  
27 213 trial.  
28  
29  
30  
31  
32

214

### 215 **Standard care**

216 Patients in the control group will receive standard care in the form of a brief didactic educational  
217 session at the time of diagnosis of diabetes and during routine clinic visits at 6 months.<sup>27</sup>

218

### 219 **Study outcomes**

220 The two primary outcomes of the intervention are a difference in trial arms at one-year follow-up  
221 in HbA1c and cardiovascular risk score. There is a growing recognition of the importance of  
222 combining tight glycaemic control with reduction in other cardiovascular risk factors for  
223 prevention of or reduction in complications.<sup>5</sup> The cardiovascular risk will be estimated by the

224 Thai cardiovascular risk score model, which estimates the risk of dying from any cardiovascular  
 225 disease over 10 years based on age, gender, smoking habits, total cholesterol and systolic blood  
 226 pressure, as it has been calibrated for use in a Thai population.<sup>28</sup>

227 Additional secondary outcomes include changes at one year for biological, physical,  
 228 psychosocial, lifestyle and intervention-related measures, as described in Table 2.

229

230 **Table 2:** Summary of primary and secondary outcome measures

| Primary outcomes                 | Measures or questionnaires                                                                                                                                                                                      |
|----------------------------------|-----------------------------------------------------------------------------------------------------------------------------------------------------------------------------------------------------------------|
| Haemoglobin A1c levels (HbA1c)   | HbA1c will measure the average blood glucose (sugar) levels over the past two to three months                                                                                                                   |
| Thai Cardiovascular risk score   | Estimates the risk of dying from any cardiovascular disease over 10 years based on age, gender, smoking habits, total cholesterol and systolic blood pressure.                                                  |
| Secondary outcomes               | Measures or questionnaires                                                                                                                                                                                      |
| Biological and physical measures | Body weight, Body Mass Index; BMI, Blood lipids (Total, LDL-C HDL, triglycerides), waist circumference, blood pressure, fasting blood glucose                                                                   |
| Quality of life                  | WHOQOL-BREF.<br><br>A 26 item questionnaire developed by WHO to assess quality of life in adults <sup>29</sup>                                                                                                  |
|                                  | The European Quality of life questionnaire; EuroQol EQ-5D 5L <sup>26</sup><br><br>EQ-5D is a quality of life measure that includes five quality of life questions on mobility, self-care, usual activity, pain, |

|                               |                                                                                                                                                                                                                                                                                                                                                                                                                                                                    |
|-------------------------------|--------------------------------------------------------------------------------------------------------------------------------------------------------------------------------------------------------------------------------------------------------------------------------------------------------------------------------------------------------------------------------------------------------------------------------------------------------------------|
|                               | anxiety/depression and a scale of 0 to 100 on how the person is feeling on that day.                                                                                                                                                                                                                                                                                                                                                                               |
| Depression                    | Hospital Anxiety and Depression Scale; HADS <sup>30</sup><br>HADS measures depression and anxiety that will address psychological change with a scale from 0 to 3.                                                                                                                                                                                                                                                                                                 |
| Stress                        | Perceived Stress Questionnaire; PSS <sup>31</sup><br>PSS is a psychological instrument for measuring the perception of stress. Ten items with a scale from 1 to 4.                                                                                                                                                                                                                                                                                                 |
| Physical activity             | International Physical Activity Questionnaire; IPAQ <sup>32</sup><br>Short form IPAQ is an assessment of physical activity comprising of seven questions. There are two forms of output from scoring the IPAQ. Results can be reported in categories (low activity levels, moderate activity levels or high activity levels) or as a continuous variable (MET-minutes a week). MET-minutes represent the amount of energy expended carrying out physical activity. |
| Diabetes knowledge and skills | Brief diabetes Illness Perception Questionnaire; B-IPQ <sup>33</sup> .<br>B-IPQ has nine components of which the first five questions assess the cognitive representation of illness perception, two of the questions assess the emotional representation, one item assesses comprehensibility and one item on the root cause of the illness                                                                                                                       |
|                               | Diabetes Self-Management Education and Support; DMSES <sup>34</sup> .<br>DMSES is one of the most widely used scale in measuring self-efficacy in type 2 diabetes management. The Thai-DMSES has                                                                                                                                                                                                                                                                   |

|                                       |                                                                                                                                                                                                                                                                                                                     |
|---------------------------------------|---------------------------------------------------------------------------------------------------------------------------------------------------------------------------------------------------------------------------------------------------------------------------------------------------------------------|
|                                       | <p>twenty questions which has been demonstrated to have good psychometric properties<sup>35</sup></p>                                                                                                                                                                                                               |
|                                       | <p>Summary of Diabetes Self-Care Activities questionnaire SDSCA<sup>36</sup></p> <p>SDSCA is a diabetes self-care activities questionnaire focusing on general diet, diabetes-specific diet, physical activity, blood-glucose testing, foot care, and smoking.</p>                                                  |
| <p>Satisfaction with intervention</p> | <p>Chronic Illness Resources Survey (CIRS)<sup>37</sup></p> <p>CIRS is a questionnaire to represent patient's received support.</p> <p>Individual's support for behavioural-specific disease management is assessed: proximal support e.g. friend and family and distal factor e.g. neighbourhood or community.</p> |
|                                       | <p>Modified Medical Interview Satisfaction Scale (MISS-21)<sup>38</sup></p> <p>MISS-21 is a questionnaire to measure patient satisfaction with patient and health care professional communication/consultation.</p>                                                                                                 |

231

## 232 Data collection and follow-up

233 Each participant will be involved in the study for 12 months after taking consent and baseline  
 234 data. The trial is expected to start January 2020 and finish October 2021.

235

236 Data collection methods will include:

- 237 a) Questionnaires: Questionnaire data will be collected face-to-face by research assistants for the  
 238 full sample at baseline, 6 and 12 months at the community primary care unit where participants  
 239 are recruited. A custom-designed form linked to RedCap will be used to collect, validate, verify,

240 and store respondents' data where possible or else data will be collected via paper forms and  
241 double-entered into the databases. All data files and databases will be password protected.

242  
243 b) Biological samples: Blood samples will be collected at baseline, 6 and 12 months, to measure  
244 fasting blood glucose, HbA1c and lipids, coordinating where possible with the annual routine  
245 tests offered to patients to reduce duplication. All blood samples will be administered from  
246 participants by trained phlebotomists. Data will be linked to the participant information using a  
247 unique respondent ID, which will be assigned to all study participants.

248  
249 c) Interviews: During the delivery of the intervention, a process evaluation using a subset of  
250 participants will be conducted using in-depth interviews and focus group discussions. These will  
251 be audio-recorded. Data will be collected using a range of qualitative methods: a) one-to-one  
252 interviews, and focus group discussions with nurses, health volunteers, people with diabetes and  
253 their carers (5-10 focus groups, and 20 semi-structured interviews) and b) ethnography through  
254 direct observations including video recordings of intervention delivery, and unstructured  
255 interviews with clinical managers and policy makers. The data collected will be used to capture  
256 the range of experiences of the intervention, and identify unanticipated pathways to generate new  
257 theories as well as exploring the scalability of the intervention.

### 258 259 **Trial follow-up appointments**

260 The research team will hold weekly briefings with the study coordinators to generate a list of  
261 priority areas and loss to follow-up participant lists. Arrangements to follow-up participants who  
262 have not turned up for their appointment will be made, with attempts to contact participants

263 through SMS, phone calls, or house visits. Participants will be declared lost to follow-up if they  
264 do not show for a month and are untraceable.

265

## 266 **Data management**

267 A data collection protocol will be developed, and the study coordinator in Thailand will provide  
268 training to fieldworkers before data collection commences. Validation will be performed on a  
269 random sample of questionnaire data by crosschecking with clinic records. Any discrepancies  
270 will be followed-up and addressed by field workers, re-contacting participants to clarify as  
271 necessary. Using Redcap (<https://redcap.med.cmu.ac.th>), quantitative data will be entered  
272 directly via a form with built-in data checks to minimise transcription errors (or where necessary  
273 collected on paper and later double entered into the electronic form). Post entry checks will be  
274 conducted by exploring the distribution, ranges, and outliers of each variable. All hospital  
275 laboratories have their own internal quality assurance protocols and are also linked to a national  
276 external quality assurance mechanism. Fieldworkers will be trained in qualitative methods and  
277 an interview schedule will be devised.

## 279 **Statistical analysis**

### 280 1. Quantitative analysis

281 Available outcome data will be analysed on an intention-to-treat basis. Potential clustering of  
282 outcomes (HbA1c at 12 months and CVD risk score at 12 months) at the level of community  
283 primary care units will be accounted for using random intercept models. To improve precision of  
284 the estimates, outcomes will be adjusted for their baseline values. In case of baseline imbalances

1  
2  
3 285 of relevant covariates (e.g. age, education level, body mass index), judged by statistical  
4  
5 286 significance at  $p < 0.05$ , we will conduct a secondary analysis adjusting for these covariates.  
6  
7

8 287

## 9 10 288 2. Qualitative analysis

11  
12 289 Qualitative data from interviews, focus groups and direct observations be will transcribed and  
13  
14 290 analysed using NVivo software. The data will be analysed using a descriptive, phenomenological  
15  
16 291 approach to understand participants' experiences and interpret them within their respective  
17  
18 292 cultural contexts. Comparative analysis will compare and contrast these themes across  
19  
20 293 participants. Deviant cases will be actively sought throughout the analysis and emerging ideas  
21  
22 294 and themes modified in response. In addition, thematic analysis will be used to inform elements  
23  
24 295 of scalability and to produce a set of considerations in making decisions about the scalability of  
25  
26 296 the intervention.  
27  
28  
29

30  
31 297

## 32 33 298 3. Cost-effective analysis

34  
35 299 Data for economic evaluation (resource usage and quality of life using EQ-5D) will be obtained  
36  
37 300 prospectively alongside the trial. We will aim to capture all health service contacts, as well as  
38  
39 301 out-of-pocket expenses and medication use. Educator training costs will be included, as well as  
40  
41 302 minimal intervention material costs (as most will be made available freely after the trial). Utility  
42  
43 303 values from EQ-5D will be derived using a Thai tariff. Incremental cost utility will be estimated  
44  
45 304 from the Thai health system and societal perspectives, to provide incremental cost-effectiveness  
46  
47 305 ratio and probability of being cost-effective at Thai government's willingness to pay threshold of  
48  
49 306 160,000 baht/QALY.  
50  
51  
52

53  
54 307  
55  
56  
57  
58  
59  
60



1  
2  
3 3084  
5 3096  
7  
8 3109  
10 311 **ETHICS AND DISSEMINATION**11  
12 312 This study is to be conducted according to the international standards of Good Clinical Practice13  
14 313 (International Conference on Harmonization guidelines), Declaration of Helsinki, and15  
16 314 International Ethical Guidelines for Biomedical Research Involving Human Subjects, applicable17  
18 315 national government regulations, and institutional research policies and procedures. All19  
20 316 investigators received GCP training at the onset of the study. Ethical approval was obtained prior21  
22 317 to commencement of the project from Chiang Mai University [No 326/2018] and the London23  
24 318 School of Hygiene & Tropical Medicine [16113/RR/12850]. The study protocol, informed25  
26 319 consent form, patient information sheet and other relevant information has been approved. Any27  
28 320 future amendments of the protocol shall be submitted to and approved by the Institutional29  
30 321 Review Board (IRB) before implementation.31  
32 32233  
34 323 **Trial monitoring and oversight**35  
36 324 The role of the Trial Steering Committee (TSC) is to provide overall supervision of the trial. The37  
38 325 TSC will meet every six months. The TSC will include experts in the field of DSME, health39  
40 326 psychology and clinical trials, as well as an independent Chair.41  
42 32743  
44 328 **Dissemination**45  
46 329 Research findings will be disseminated to scientific audiences at major conferences and47  
48 330 published in high-impact, open-access scientific journals; planned publications include those on

1  
2  
3 331 intervention development, primary trial results, process evaluation, and health systems analysis,  
4  
5 332 at a minimum. This study is expected to have a major policy impact due to the close involvement  
6  
7 333 of a key policy maker in the project. Towards the end of the study a dedicated workshop will be  
8  
9 334 held with key governmental stakeholders to disseminate the recommended model for DSME  
10  
11 335 implementation in Thailand and encourage inclusion of a large-scale scientific evaluation into  
12  
13 336 any national implementation of the scheme.  
14  
15  
16  
17 337  
18

19 338 **Contributors:** CA, SS, OQ, PACM, SK were involved in conception and trial design. CA, KP,  
20  
21 339 PACM and SK wrote the first draft of the trial design proposal. KR, WT, KH, KK were involved  
22  
23 340 in critical revision of the trial design proposal. All authors contributed to finalising the trial  
24  
25 341 protocol. CA, KP, IPN, CP, AH, NW were involved with preparation of the manuscript for  
26  
27 342 submission. All authors reviewed the manuscript and approved the manuscript for publication.  
28  
29  
30  
31 343

### 32 344 **Funding**

33  
34  
35 345 This study is supported by UK Medical Research Council (MRC) grant number  
36  
37 346 [MR/R020876/1] and the Thailand Research Fund (TRF) grant number [DBG6180007].  
38  
39

### 40 347

### 41 348 **Data availability**

42  
43  
44 349 Data will be shared upon reasonable request  
45  
46  
47 350

### 48 351 **Patient and Public Involvement**

49  
50  
51 352 Patients or the public WERE NOT involved in the design, or conduct, or reporting, or  
52  
53 353 dissemination plans of our research.  
54  
55  
56  
57  
58  
59

1  
2  
3 354 **Trial registration and version**  
4

5 355 The trial has been registered (ClinicalTrials.gov ID NCT03938233 Version 3 last update January  
6  
7 356 18,2020)  
8  
9

10 357 **Trial sponsor**  
11

12 358 This study is sponsored by London School of Hygiene & Tropical Medicine, Keppel Street,  
13  
14 359 London WC1E 7HT, UK [16113].  
15  
16

17 360 **Competing interests**  
18

19 361 None declared  
20  
21

22 362 **Ethics approval**  
23

24 363 The study has been approved by the Chiang Mai University Research Ethics Committee  
25  
26 364 [326/2018] and the London School of Hygiene & Tropical Medicine [16113/RR/12850].  
27  
28

29 365  
30

31 366 **Figure 1 Legend:** Trial flow diagram  
32

33 367  
34

35 368 **REFERENCES**  
36

- 37  
38 369 1. Deerochanawong C, Ferrario A. Diabetes management in Thailand: a literature  
39  
40 370 review of the burden, costs, and outcomes. *Glob Health* 2013; 9: 11.  
41  
42 371 2. International Diabetes Federation. *IDF Diabetes Atlas Seventh Edition*. 2015.  
43  
44 372 3. Jiraporncharoen W, Pinyopornpanish K, Junjom K, et al. Exploring perceptions,  
45  
46 373 attitudes and beliefs of Thai patients with type 2 diabetes mellitus as they relate to  
47  
48 374 medication adherence at an out-patient primary care clinic in Chiang Mai, Thailand.  
49  
50 375 *BMC Family Practice* 2020;21(1):173. doi: 10.1186/s12875-020-01233-7  
51  
52  
53  
54  
55  
56  
57  
58  
59  
60

- 1  
2  
3 376 4. Effect of intensive blood-glucose control with metformin on complications in  
4  
5 377 overweight patients with type 2 diabetes (UKPDS 34). *The Lancet* 1998; 352: 854–  
6  
7 378 65.
- 8  
9  
10 379 5. Gaede P, Vedel P, Larsen N, Jensen GVH, Parving H-H, Pedersen O. Multifactorial  
11  
12 380 intervention and cardiovascular disease in patients with type 2 diabetes. *N Engl J*  
13  
14 381 *Med* 2003; 348: 383–93.
- 15  
16  
17 382 6. Rangsin R. An assessment of quality of care among patients diagnosed with type 2  
18  
19 383 diabetes and hypertension visiting hospitals of ministry of public health and Bangkok  
20  
21 384 Metropolitan Administration in Thailand. 2012.
- 22  
23  
24 385 7. Auemaneekul N, Chandanasotthi P, Rawiworrakul T, et al. Community partnership,  
25  
26 386 context-based intervention and diabetes control in Thailand. *J Public Health* 2016;  
27  
28 387 46: 236–47.
- 29  
30  
31 388 8. Haas L, Maryniuk M, Beck J, et al. National standards for diabetes self-management  
32  
33 389 education and support. *Diabetes Educ* 2012; 38: 619–629.
- 34  
35 390 9. Chrvala CA, Sherr D, Lipman RD. Diabetes self-management education for adults  
36  
37 391 with type 2 diabetes mellitus: A systematic review of the effect on glycemic control.  
38  
39 392 *Patient Educ Couns* 2016; 99: 926–43.
- 40  
41  
42 393 10. Pillay J, Armstrong MJ, Butalia S, et al. Behavioral programmes for type 2 diabetes  
43  
44 394 mellitus: A systematic review and network meta-analysis. *Ann Intern Med* 2015;  
45  
46 395 163: 848.
- 47  
48  
49 396 11. Doyle G, O'Donnell S, Quigley E, et al. Patient level cost of diabetes self-  
50  
51 397 management education programmes: an international evaluation. *BMJ Open* 2017; 7:  
52  
53 398 e013805.
- 54  
55  
56  
57  
58  
59  
60

- 1  
2  
3 399 12. Fisher EB, Boothroyd RI, Elstad EA, et al. Peer support of complex health behaviors  
4  
5 400 in prevention and disease management with special reference to diabetes: Systematic  
6  
7 401 reviews. *Clin Diabetes Endocrinol* 2017; 3. DOI:10.1186/s40842-017-0042-3.  
8  
9  
10 402 13. Dale JR, Williams SM, Bowyer V. What is the effect of peer support on diabetes  
11  
12 403 outcomes in adults? A systematic review. *Diabet Med* 2012; 29: 1361–77.  
13  
14  
15 404 14. Norris SL, Chowdhury FM, Van Le K, et al. Effectiveness of community health  
16 405 workers in the care of persons with diabetes. *Diabet Med J Br Diabet Assoc* 2006;  
17  
18 406 23: 544–56.  
19  
20 407  
21  
22 408 15. World Health Organization. Peer support programmes in diabetes: report of a WHO  
23  
24 409 consultation 5-7 November 2007. Geneva, Switzerland: WHO, 2008.  
25  
26  
27 410 16. Fisher EB, Boothroyd RI, Coufal MM, et al. Peer support for self-management of  
28  
29 411 diabetes improved outcomes in international settings. *Health Aff (Millwood)* 2012;  
30  
31 412 31: 130–9.  
32  
33  
34 413 17. Trento M, Gamba S, Gentile L, et al. Rethink Organization to iMprove Education  
35  
36 414 and Outcomes (ROMEIO): A multicenter randomized trial of lifestyle intervention by  
37  
38 415 group care to manage type 2 diabetes. *Diabetes Care* 2010; 33: 745–7.  
39  
40  
41 416 18. Werfalli M, Raubenheimer P, Engel M, et al. Effectiveness of community-based  
42  
43 417 peer-led diabetes self-management programme (COMP-DSMP) for improving  
44  
45 418 clinical outcomes and quality of life of adults with diabetes in primary care settings  
46  
47 419 in low and middle-income countries (LMIC): A systematic review and meta-analysis.  
48  
49 420  
50 420 BMJ Open 2015; 5: e007635.  
51  
52  
53  
54  
55  
56  
57  
58  
59  
60

- 1  
2  
3 421 19. Keeratiyutawong P, Hanucharurnkl S, Melkus G, Vorapongsathon OPT.  
4  
5 422 Effectiveness of a self-management programme for Thais with type 2 diabetes. Thai  
6  
7 423 J Nurs Res 2006; 10: 85–97.  
8  
9  
10 424 20. Craig P, Dieppe P, Macintyre S, Michie S, Nazareth I, Petticrew M. Developing and  
11  
12 425 evaluating complex interventions: the new Medical Research Council guidance. BMJ  
13  
14 426 2008; a1655.  
15  
16  
17 427 21. Wattana C, Srisuphan W, Pothiban L, Upchurch SL. Effects of a diabetes self-  
18  
19 428 management programme on glycaemic control, coronary heart disease risk, and  
20  
21 429 quality of life among Thai patients with type 2 diabetes. Nurs Health Sci 2007; 9:  
22  
23 430 135–41.  
24  
25  
26 431 22. Wan EYF, Fung CSC, Wong CKH, Chin WY, Lam CLK. Association of  
27  
28 432 hemoglobin A1c levels with cardiovascular disease and mortality in Chinese patients  
29  
30 433 with diabetes  
31  
32  
33 434 23. Khunti K, Gray LJ, Skinner T, et al. Effectiveness of a diabetes education and self-  
34  
35 435 management programme (DESMOND) for people with newly diagnosed type 2  
36  
37 436 diabetes mellitus: Three-year follow-up of a cluster randomised controlled trial in  
38  
39 437 primary care. BMJ 2012; 344: e2333–e2333.  
40  
41  
42 438 24. Tuong W, Larsen ER, Armstrong AW. Videos to influence: A systematic review of  
43  
44 439 effectiveness of video-based education in modifying health behaviors. J Behav Med  
45  
46 440 2014; 37: 218–33.  
47  
48  
49 441 25. Moore GF, Audrey S, Barker M, et al. Process evaluation of complex interventions:  
50  
51 442 Medical Research Council guidance. BMJ 2015; 350: h1258–h1258.  
52  
53  
54  
55  
56  
57  
58  
59  
60

- 1  
2  
3 443 26. Kimman M, et al. Validity of the Thai EQ-5D in an occupational population in  
4  
5 444 Thailand. *Qual Life Res* 2013 Aug; 22(6):1499-506.  
6  
7  
8 445 27. Clinical Practice Guidelines for Diabetes. Diabetes Association of Thailand, 2017.  
9  
10 446 ([https://www.dmthai.org/index.php/knowledge/healthcare-providers/cpg/443-  
13  
14 448 28. Aekplakorn A, Bunnag P, Woodward M. et al. Risk score for predicting incident  
15  
16 449 diabetes in the Thai population. \*Diabetes Care\* 2006 Aug; 29\(8\):1872-1877  
17  
18  
19 450 29. Mahatnirunkul S, Tuntipivanaskul W, Pumpisanchai W, et al. Comparison of the  
20  
21 451 WHOQOL-100 and the WHOQOL-BREF. \*Journal of Mental Health of Thailand\*  
22  
23 452 1998; 5: 4-15.  
24  
25  
26 453 30. Nilchaikovit T. et al. Development of Thai version of hospital anxiety and depression  
27  
28 454 scale in cancer patients. \*J Psychiatr Assoc Thailand\* 1996; 41\(1\):18-30.  
29  
30  
31 455 31. Wongpakaran N, Wongpakaran T. The Thai version of the PSS-10: An investigation  
32  
33 456 of its psychometric properties. \*BioPsychoSocial Medicine\* 2010: 4:6  
34  
35 457 32. Rattanawiwatpong P, et al. Validity and reliability of the Thai version of Short  
36  
37 458 Format International Physical Activity Questionnaire \(IPAQ\). \*J Thai Rehabil\* 2006;  
38  
39 459 16\(3\):147-160.  
40  
41  
42 460 33. Leelacharas S, et al. Illness perceptions, lifestyle behaviours, social support and  
43  
44 461 cardiovascular risks in people with Hypertension in Urban and Rural Areas of  
45  
46 462 Thailand. \*Pacific Rim Int J Nur Res\* 2015; 19  
47  
48  
49 463 34. Lamsumang, W. The development of the Thai version of the diabetes management  
50  
51 464 self-efficacy scale \(T-DMSES\) for older adults with type 2 diabetes. State University  
52  
53 465 of New York at Buffalo, New York; 2009.  
54  
55  
56  
57  
58  
59](https://www.dmthai.org/index.php/knowledge/healthcare-providers/cpg/443-<br/>11<br/>12 447 guideline-diabetes-care-2017)

- 1  
2  
3 466 35. Sangruangake M, Jirapornkul C, Hurst C. Psychometric properties of diabetes  
4  
5 467 management self-efficacy in Thai type 2 diabetes mellitus patients: A multicenter  
6  
7 468 study. *Int J Endocrinol*. 2017;2017:2503156. doi:10.1155/2017/2503156)  
8  
9  
10 469 36. Keeratiyatawong, P, Hanucharumkul, S., Melkus, G. D. E., Panpakdee, O.,  
11  
12 470 Vorapongsathorn T. Effectiveness of a self-management programme for Thais with  
13  
14 471 type 2 diabetes. *Thai J Nurse Res*. 2006; 10: 85-97  
15  
16  
17 472 37. Manit A, et al. Development of needs and resources for self-management assessment  
18  
19 473 instrument in Thais with type 2 diabetes: Cross-cultural adaptation. *J Med Assoc*  
20  
21 474 *Thai* 2011; Vol. 94 No. 11.  
22  
23  
24 475 38. Meakin R and Weinman J. The 'Medical Interview Satisfaction Scale' (MISS-21)  
25  
26 476 adapted for British general practice. *Family Practice* 2002; 19:257–263.  
27  
28  
29 477



1  
2  
3  
4  
5  
6  
7  
8  
9  
10  
11  
12  
13  
14  
15  
16  
17  
18  
19  
20  
21  
22  
23  
24  
25  
26  
27  
28  
29  
30  
31  
32  
33  
34  
35  
36  
37  
38  
39  
40  
41  
42  
43  
44  
45  
46  
47  
48  
49  
50  
51  
52  
53  
54  
55  
56  
57  
58  
59  
60



Figure 1: Trial flow diagram  
27x20mm (1200 x 1200 DPI)



## Participant Information Sheet

### Title of Project: Delivering Diabetes Self-Management Education in Thailand

#### Introduction

We would like to invite you to take part in a research study. Joining the study is entirely up to you. Before you decide, you need to understand why the research is being done and what it would involve. One of our team will go through this information sheet with you, and answer any questions you may have. Ask questions if anything you read is not clear or you would like more information. Please feel free to talk to others about the study if you wish. Take time to decide whether or not to take part.

#### What is the purpose of the study?

The London School of Hygiene and Tropical Medicine (LSHTM) are conducting research for people with type 2 diabetes in Chiang Mai Thailand who have recently been diagnosed. The purpose of this study is to provide diabetes self-management education (DSME) by trained nurses and peer health care volunteers for those recently diagnosed.

This is a 3 arm cluster randomised trial where your service provider has been randomised to one of the following 3 interventions: 1) usual treatment 2) Nurse led DSME 3) Peer led DSME.

#### Why have I been asked to take part?

You have been invited because your healthcare provider is involved in the study and has identified you as being newly diagnosed with type 2 diabetes.

#### Do I have to take part?

No. It is up to you to decide to take part or not. If you don't want to take part, that's ok. Your doctor will still care for you and your decision will not affect the quality of care you receive.

We will discuss the study together and give you a copy of this information sheet. If you agree to take part, we will then ask you to sign a consent form.

#### What will happen to me if I take part?

#### Enrolling you in the study

If you are interested in taking part the research assistant will go through the information sheet with you. If you are happy with the information provided you may complete the consent form.

At this point you will also have the opportunity to raise with the researcher any questions you might have about the study. You do not have to enter the study unless you feel completely happy with what you are being asked to do.

#### A copy of this informed consent document to be offered to the participant

Study title: A scalable solution for delivery of Diabetes Self-Management Education in Thailand

Version & Date: V0.1 08/10/2018

Principal Investigator: Sanja Kinra

REC ref:

Participant Information Sheet For peer review only - <http://bmjopen.bmj.com/site/about/guidelines.xhtml> Page 1 of 5



## **Participating in a diabetes education programme**

You will be invited to attend a diabetes self-management educational programme. This programme will consist of a number of sessions delivered as monthly meetings led by community health volunteers or nurses. Short films about living with diabetes will be shown to introduce key topics.

The education and skills training will be followed by an open discussion session to discuss common challenges and solutions, set lifestyle goals and seek advice.

## **Collecting information**

If you are happy to proceed with the study the researcher will then ask a series of questions relating to your health. This will be through completing a questionnaire booklet. These baseline questions will take about twenty minutes to complete. We will also take blood samples as the beginning of the study from trained phlebotomists.

Each participant will be compensated 200 baht for each of the baseline, 6 month and 12 month visit.

## **Follow up**

Six months and twelve months after you have entered the study we will contact you again to ask you a further set of questions and blood samples to see how you are feeling now.

## **How is taking part in the study different from usual care?**

Additional support and education may be provided through the study through the self-management education programme.

Whilst you are taking part in the study you will continue to be looked after by your healthcare providers, as normal. No treatment will be withheld from you during the course of this study.

The researcher will want you to complete some questionnaires at the beginning of the study and after six and twelve months. You may be asked to take part in an interview with a researcher.

## **What are the possible risks and disadvantages?**

It will take some time to complete the questionnaire, around twenty minutes to complete. If you agree to be further interviewed, then this will also mean time will be needed to attend the interview. You may find minor discomfort from the taking blood samples. We will have trained phlebotomists to take the blood sample.

## **What are the possible benefits?**

*We cannot promise the study will help you but the information we get from the study will help our knowledge and understanding of this research area within diabetes self-management education in Thailand.*

### **A copy of this informed consent document to be offered to the participant**

Study title: A scalable solution for delivery of Diabetes Self-Management Education in Thailand

Version & Date: V0.1 08/10/2018

Principal Investigator: Sanja Kinra

REC ref:

Participant Information Sheet For peer review only - <http://bmjopen.bmj.com/site/about/guidelines.xhtml> Page 2 of 5

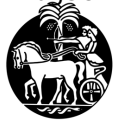

### What if something goes wrong?

If you have a concern about any aspect of this study, you should ask to speak to the researchers who will do their best to answer your questions <+66(0)616852307>. If you remain unhappy and wish to complain formally, you can do this by contacting <if LSHTM is the sponsor: Patricia Henley at [rgio@lshtm.ac.uk](mailto:rgio@lshtm.ac.uk) or +44 (0) 20 7927 2626>

The London School of Hygiene and Tropical Medicine holds insurance policies which apply to this study. If you experience harm or injury as a result of taking part in this study, you may be eligible to claim compensation.

### Can I change my mind about taking part?

Yes. You can withdraw from the study at any time. You just need to tell your doctor that you don't want to be in the study anymore. Your doctor will still care for you.

If you withdraw from the study we will destroy all your identifiable samples/ tape recorded interviews, but we will need to use the data collected on you up to your withdrawal

Or

You can withdraw from treatment but keep in contact with us to let us know your progress. Information collected may still be used. Any stored blood or tissue samples that can still be identified as yours will be destroyed if you wish, or will continue to be stored for further research.

### What will happen to information collected about me?

All information collected about you will be kept private. Only the study staff and authorities who check that the study is being carried out properly will be allowed to look at information about you. Data may be sent to other study staff in London or in Chiang Mai but this will be anonymised. This means that any information about you which leaves the hospital, will have your name and address removed so that you cannot be recognised.

Your doctor will send some details about you to the study team in Chiang Mai University who will store it securely. Your personal details will be kept in a different safe place to the other study information and will be destroyed within 10 years of the end of the study.

At the end of the project, the study data will be archived at Chiang Mai University. The data will be made available to other researchers worldwide for research and to improve medical knowledge and patient care. Your personal information will not be included and there is no way that you can be identified.

### What will happen to the results of this study?

The study results will be published in a medical journal so that other doctors can learn from them. Your personal information will not be included in the study report and there is no way that you can be identified from it.

### Who is organising and funding this study?

London School of Hygiene & Tropical Medicine is the sponsor for the research and they have full responsibility for the project including the collection, storage and analysis of your data.

This study is funded by the Medical Research Council UK and The Thailand Research Fund

### Who has checked this study?

All research involving human participants is looked at by an independent group of people, called a Research Ethics Committee, to protect your interests. This study has been reviewed and given favourable opinion by The London

#### A copy of this informed consent document to be offered to the participant

Study title: A scalable solution for delivery of Diabetes Self-Management Education in Thailand

Version & Date: V0.1 08/10/2018

Principal Investigator: Sanja Kinra

REC ref:

Participant Information Sheet For peer review only - <http://bmjopen.bmj.com/site/about/guidelines.xhtml> Page 3 of 5

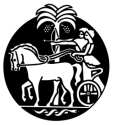

School of Hygiene and Tropical Medicine Research Ethics Committee (<ref: 16113>). The Research Ethics Committee, Faculty of Medicine, Chiang Mai University (No 326/2018) has also reviewed the study and have agreed that it is okay for us to ask people to take part.

### Further information and contact details

Thank you for taking time to read this information leaflet. If you think you will take part in the study please read and sign the consent form.

If you would like any further information, please contact Dr. Chaisiri Angkurawaranon, MD, who can answer any questions you may have about the study.

Contact details: Chaisiri Angkurawaranon, Department of Family Medicine, Faculty of Medicine, Chiang Mai University. Tel +66(0)616852307, Email: chaisiri.a@cmu.ac.th

### What happens if new information becomes available during the study?

Sometimes during a study, new information becomes available about the treatment being studied. If this happens, the research team will tell you and discuss whether you want to continue in the study. If you decide to stop taking part in the study your usual care will continue. If you decide to continue in the study you may be asked to sign an updated consent form. If we think you should withdraw from the study, we will explain the reasons and arrange for your care to continue.

### What happens when the study stops?

Very occasionally a study is stopped early. If this happens, the reasons will be explained to you.

### Tissue studies:

What will happen to the samples I give?

Blood samples will be used to measure HbA1c and lipids, coordinating where possible with the annual routine tests offered to patients to reduce duplication. Blood will be drawn by a trained phlebotomist when participants come for interview and sent to laboratory for analysis. Data will be linked to the participant information using a unique respondent ID, which will be assigned to all study participants.

Blood samples will be sent to a laboratory within the Chiang Mai area. The results of the blood tests will be provided to your health care professional who will discuss with you if there are any issues.

We may use some of the samples collected for future studies. These will be anonymised when stored, and all future research using these samples will be reviewed by an independent ethics committee.

### A copy of this informed consent document to be offered to the participant

Study title: A scalable solution for delivery of Diabetes Self-Management Education in Thailand

Version & Date: V0.1 08/10/2018

Principal Investigator: Sanja Kinra

REC ref:

Participant Information Sheet For peer review only - <http://bmjopen.bmj.com/site/about/guidelines.xhtml> Page 4 of 5

**CONSENT FORM FOR PARTICIPANT AND REPRESENTATIVE**

**Title of Project: A scalable solution for delivery of Diabetes Self-Management Education in Thailand**

**Name of PI/Researcher responsible for project: Chaisiri Angkurawaranon**

1  
2  
3  
4  
5  
6  
7  
8  
9  
10  
11  
12  
13  
14  
15  
16  
17  
18  
19  
20  
21  
22  
23  
24  
25  
26  
27  
28  
29  
30  
31  
32  
33  
34  
35  
36  
37  
38  
39  
40  
41  
42  
43  
44  
45  
46  
47  
48  
49  
50  
51  
52  
53  
54  
55  
56  
57  
58  
59  
60

| Statement                                                                                                                                                                                                                                                                                                              | Please initial or thumbprint* each box |
|------------------------------------------------------------------------------------------------------------------------------------------------------------------------------------------------------------------------------------------------------------------------------------------------------------------------|----------------------------------------|
| I confirm that I have read and understood the information sheet dated 08.10.2018 (version 1.0) for the above named study. I have had the opportunity to consider the information, ask questions and have these answered satisfactorily.                                                                                |                                        |
| I understand that my consent is voluntary and that I am free to withdraw this consent at any time without giving any reason and without my medical care or legal rights being affected.                                                                                                                                |                                        |
| I understand that relevant sections of my/the participant's medical notes and data collected during the study may be looked at by authorised individuals from Chiang Mai University, where it is relevant to my taking part in this research. I give permission for these individuals to have access to these records. |                                        |
| I understand that data about/from me/the participant may be shared via a public data repository or by sharing directly with other researchers, and that I will not be identifiable from this information                                                                                                               |                                        |
| I understand that the tissue sample collected from me will be used to support other research in the future, and may be shared anonymously with other researchers, for their ethically-approved projects                                                                                                                |                                        |
| I give permission for a copy of this consent form, which contains my personal information, to be made available to the Trial Coordinating Centre for monitoring purposes only.                                                                                                                                         |                                        |
| I agree to my health care provider being informed of my participation in the study.                                                                                                                                                                                                                                    |                                        |
| I agree to me taking part in the above named study.                                                                                                                                                                                                                                                                    |                                        |

|  |  |  |
|--|--|--|
|  |  |  |
|--|--|--|

Printed name of participant/Representative      Signature of participant/Representative      Date  
(or thumbprint/mark if unable to sign)

|  |  |  |
|--|--|--|
|  |  |  |
|--|--|--|

Printed name of person obtaining consent      Signature of person obtaining consent      Date

The participant is unable to sign. As a witness, I confirm that all the information about the trial was given and the participant/representative consented to taking part *(\*only required if the participant/representative is unable to read or write)*

|  |  |  |
|--|--|--|
|  |  |  |
|--|--|--|

Printed name of impartial witness\*      Signature of impartial witness\*      Date

**A copy of this informed consent document has been provided to the participant.**

Centre Number:  
Study Number:  
Participant Identification Number:

## แบบขอรับความยินยอมเข้าร่วมโครงการ (Consent ข้อมูลสำหรับผู้ป่วย)

ชื่อโครงการศึกษาวิจัย : “การพัฒนาทางออกเพื่อการขยายการบริการที่เพิ่มความสามารถในการดูแลตนเองของผู้ที่เป็นเบาหวานในประเทศไทย”

หมายเลขโครงการศึกษาวิจัย : FAM-2561-05594

ผู้ให้ทุนสนับสนุนการวิจัย : สำนักงานคณะกรรมการส่งเสริมวิทยาศาสตร์ วิจัยและนวัตกรรม (สกสว.)

แพทย์ผู้วิจัยหลัก : อ.ดร.นพ.ชัยสิริ อังกระวรรณนท์

ท่านได้รับการเชิญให้เข้าร่วมการศึกษานี้เนื่องจากท่านได้รับการวินิจฉัยว่าเป็นโรคเบาหวานที่เพิ่งได้รับการวินิจฉัยมาไม่เกิน 1 ปี หรือเป็นผู้ป่วยเบาหวานที่ยังไม่สามารถควบคุมน้ำตาลได้ ขอให้ท่านกรุณาอ่านข้อมูลข้างล่างก่อน (หรือผู้วิจัยได้อ่านให้ท่านรับทราบ) หากท่านมีข้อข้องใจใดๆ เกี่ยวกับการศึกษานี้ และสิทธิของท่าน กรุณาซักถามจากแพทย์ผู้ทำการศึกษานี้ หรือ ผู้ช่วยแพทย์ที่ทำการศึกษานี้ ซึ่งจะเป็นผู้สามารถให้ความกระจ่างแก่ท่านได้ หากท่านตัดสินใจเข้าร่วมการศึกษานี้ ท่านจะได้รับเอกสารข้อมูลสำหรับผู้เข้าร่วมโครงการวิจัยและสำเนาใบยินยอมที่ท่านเซ็นชื่อกำกับเก็บไว้ 1 ฉบับ

### การศึกษานี้เกี่ยวกับเรื่องอะไร

เนื่องจากในปัจจุบันนี้มีผู้ป่วยเป็นโรคเบาหวานจำนวนมากขึ้น และพบว่าผู้ป่วยเป็นโรคเบาหวานนี้สัมพันธ์กับภาวะแทรกซ้อนทางสุขภาพมากมาย เพื่อให้เป็นประโยชน์ต่อการพัฒนาการดูแลรักษาผู้ป่วยเบาหวานในอนาคต ผู้วิจัยจึงสนใจที่จะศึกษาว่าการเป็นโรคเบาหวานนั้นสัมพันธ์กับการเปลี่ยนแปลงระดับชีวภาพในร่างกายอย่างไร โดยผ่านการตรวจเลือดและอุจจาระ และเพื่อศึกษาว่าการจัดทำโครงการให้ความรู้ในการดูแลตนเองของผู้ป่วยเบาหวานโดยใช้สื่อมัลติมีเดียเข้าช่วยเหลือมีผลลัพธ์ของการรักษาที่ดีขึ้นได้หรือไม่ การศึกษานี้จะรวบรวมผู้ป่วยประมาณ 600 ราย จากโรงพยาบาลชุมชนที่ให้การรักษาระบบปฐมภูมิ ในจังหวัดเชียงใหม่ และ ลำปาง

### ท่านจะต้องปฏิบัติตัวอย่างไร

หากท่านตัดสินใจเข้าร่วมการศึกษานี้ท่านจะถูกขอร้องให้เซ็นชื่อลงในใบยินยอมท่านจะได้รับการซักประวัติเกี่ยวกับโรคประจำตัวและการรักษาที่ได้รับ ได้ตรวจร่างกาย และการเจาะเลือด

เพื่อเป็นข้อมูลเริ่มต้นก่อนการรักษา โดยทั้งนี้ท่านจะได้รับการดูแลตามปกติควบคู่ไป

จากนั้นท่านจะได้รับการอบรมเพื่อพัฒนาศักยภาพในการดูแลตนเองในโรคเบาหวานของท่านโดยทีมดูแลสุขภาพ ซึ่งหน่วยบริการของท่านจะถูกสุ่มให้อยู่ 1 ใน 3 กลุ่ม อันได้แก่ กลุ่มทดลอง1 กลุ่มทดลอง2 และกลุ่มควบคุม โดยทั้ง 3 กลุ่มจะได้รับข้อมูลและการดูแลพื้นฐานเช่นเดียวกัน แต่แตกต่างกันในรูปแบบของการให้การอบรมในการดูแลตนเองของผู้ป่วยเบาหวาน ซึ่งจะใช้เวลาไม่นาน ไม่เกิน ครึ่งวัน โดย

- กลุ่มที่1 อบรมโดยบุคลากรทางการแพทย์ พยาบาล หรือ เจ้าหน้าที่สาธารณสุข
- กลุ่มที่2 อบรมโดยกลุ่มเพื่อนช่วยเพื่อนหรืออสม.ที่ผ่านการฝึกอบรมด้านการเพิ่มศักยภาพในการดูแลตนเองในโรคเบาหวาน
- กลุ่มที่ 3 ได้รับความรู้จากการดูแลตามมาตรฐานของกระทรวงสาธารณสุข

ซึ่งทั้งสามกลุ่ม จะมีการนัด หรือ ติดตาม ความก้าวหน้าพฤติกรรม的自我ดูแลตนเอง ทุกๆ 1-3 เดือน

การติดตามผลเลือดและตอบแบบสอบถาม จะถูกทำในครั้งแรกข้างต้น และอีก 2 ครั้ง คือ ที่ 6 เดือนและที่ 12 เดือนนับจากครั้งแรกที่อบรม โดยทั้ง 3 ครั้ง ท่านจะถูกเจาะเลือดเพื่อส่งตรวจปริมาตรทั้งสิ้นครั้งละ 40 มิลลิลิตร

### ความเสี่ยงจากการเข้าร่วมการวิจัยนี้

ความเสี่ยงจากการเจาะเลือด - ท่านอาจรู้สึกหน้ามืด เป็นลม ปวดบริเวณที่เจาะ หรือมีจ้ำเลือดบริเวณที่เจาะ มีความเสี่ยงน้อยมากที่จะเกิดการติดเชื้อจากการเจาะเลือดเพราะเราใช้เข็มเจาะเลือดที่ปราศจากเชื้อและใช้ครั้งเดียวทิ้ง การเจาะเลือดทั้งหมดอยู่ในสถานพยาบาล และหากมีปัญหาจะได้รับการดูแลทันที

### ท่านจะได้ประโยชน์อะไรจากการศึกษา

ท่านจะได้รับความรู้เพื่อนำไปใช้ในการดูแลตนเองเพื่อควบคุมโรคเบาหวานของท่าน และผลสรุปที่ได้จากการศึกษานี้จะเป็นประโยชน์ต่อผู้ป่วยรายอื่นในอนาคต

### ค่าใช้จ่ายในการเข้าร่วมวิจัย

ท่านจะไม่ต้องเสียค่าใช้จ่ายเพิ่มเติมเกี่ยวกับการวิจัยนอกเหนือจากค่ารักษาปกติที่ควรจะเป็นซึ่งท่านสามารถใช้สิทธิในการเบิกจ่ายได้ตามสิทธิการรักษาปกติของท่าน

### ค่าตอบแทน

สำหรับการมาตรวจติดตามที่เพิ่มจากการตรวจรักษาตามปกติ จำนวน 5 ครั้ง ซึ่งจะมีการตรวจเลือด รวม 3 ครั้ง ท่านจะได้รับค่าเดินทางและค่าเสียเวลาครั้งละ 100 บาท (รวม 500 บาทต่อคน ตลอดระยะเวลาโครงการ 1 ปี)



## หากท่านได้รับบาดเจ็บจากการเข้าร่วมการศึกษาวิจัย

หากท่านได้ปฏิบัติตามคำแนะนำของแพทย์ผู้วิจัยแล้ว กระบวนการต่าง ๆ ในการวิจัยทำให้ท่านได้รับบาดเจ็บ เมื่อผู้วิจัยได้รับแจ้งจากท่าน ท่านจะได้รับการส่งต่อเพื่อรักษาภาวะดังกล่าวทันที

## ท่านจะอย่างไรหากท่านไม่ต้องการเข้าร่วมการศึกษาวิจัย หรือเปลี่ยนใจระหว่างร่วมศึกษาวิจัย

ท่านไม่จำเป็นต้องเข้าร่วมการศึกษาวิจัยนี้หากท่านไม่สมัครใจ หลังจากท่านตัดสินใจจะเข้าร่วมการศึกษาแล้ว ท่านสามารถจะถอนตัวได้ตลอดเวลา การตัดสินใจของท่านจะไม่มีผลต่อการรักษาในอนาคต หรือการดูแลอื่นใดหากท่านไม่ต้องการเข้าร่วมการศึกษาหรือต้องการหยุดการศึกษา ณ เวลาใดก็ตาม แพทย์ของท่านจะอธิบายให้ทราบถึงการรักษาอื่น ๆ ซึ่งเป็นทางเลือกที่มีอยู่ขณะนี้ ผู้วิจัยอาจจะตัดสินใจยกเลิกท่านจากการศึกษา หากเห็นว่าจะเป็นประโยชน์สำหรับท่านมากกว่า

## ใครจะรู้บ้างว่าท่านเข้าร่วมการศึกษานี้

แพทย์ประจำตัวท่าน (แพทย์เวชปฏิบัติทั่วไป) ควรจะได้รับทราบว่าท่านตัดสินใจเข้าร่วมการศึกษาวิจัยนี้ ข้อมูลของท่านที่ถูกบันทึกไว้ระหว่างการศึกษานี้ เช่นเดียวกับข้อมูลที่เกี่ยวข้องจากแฟ้มเวชระเบียนของโรงพยาบาล คลินิก บริษัทฯ หรือข้อมูลอื่น ๆ จะถูกเก็บไว้เป็นความลับตลอดเวลา คณะกรรมการจริยธรรมการวิจัยสามารถที่จะขอตรวจสอบข้อมูลเหล่านี้ได้ โดยข้อมูลเหล่านี้จะยังเก็บรักษาไว้เป็นเรื่องลับเฉพาะ

## การปกป้องรักษาข้อมูล : ข้อมูลใดบ้างที่จะถูกเก็บรวบรวมไว้จากการศึกษานี้

ข้อมูลที่ถูกเก็บรวบรวมนั้นจะมีเฉพาะในส่วนที่เกี่ยวข้องกับการศึกษาเพื่อวัตถุประสงค์ทางการวิจัยทางการแพทย์ โดยจะไม่มีการอ้างถึงข้อมูลส่วนตัวของท่าน อันได้แก่ชื่อท่าน ในรายงานหรือวารสารใด ๆ หากท่านตกลงใจเข้าร่วมการศึกษา ท่านยินยอมที่จะไม่จำกัดการให้ข้อมูลที่เป็นส่วนตัวยกเว้นในกรณีที่ขัดต่อสิทธิส่วนบุคคลภายใต้กฎหมายคุ้มครองสิทธิส่วนบุคคล

## หากท่านมีคำถามเกี่ยวกับการศึกษานี้ท่านสามารถติดต่อใครได้บ้าง

หากท่านมีคำถามหรือมีความวิตกกังวลเกี่ยวกับการศึกษาวิจัยนี้ หรือสงสัยว่าท่านกำลังได้รับบาดเจ็บจากการเข้าร่วมการวิจัยนี้ กรุณาติดต่อ คุณกุลฎาภา อยู่นัด ได้ที่ ภาควิชาเวชศาสตร์ครอบครัว โทรศัพท์ที่ทำงาน 053-936362 (ในเวลาราชการ)

## ส่วนแสดงความยินยอม

โดยการลงนามในหนังสือยินยอมฉบับนี้ ท่านยอมรับว่าได้อ่านเอกสารฉบับนี้แล้วและได้รับคำอธิบายเกี่ยวกับการศึกษาวิจัยนี้ รวมถึงได้รับคำตอบเกี่ยวกับข้อสงสัยต่าง ๆ ที่ท่านมีจากผู้วิจัยแล้ว

1  
2  
3  
4  
5 ท่านตกลงใจที่จะเข้าร่วมในการศึกษาวิจัยนี้ และมีสิทธิ์ที่จะถอนตัวจากการศึกษาวิจัยนี้ได้ทุกเมื่อ โดยไม่มี  
6 ผลต่อการรักษาในอนาคต โดยการลงนามนี้ท่านไม่ได้สละสิทธิ์ใด ๆ ที่พึงมีทางกฎหมาย  
7  
8 ทั้งนี้ ท่านยินยอมที่จะเข้ารับการอบรมในโครงการวิจัย ตอบแบบสอบถามและ  
9

10  
11  
12  
13  
14 ลายมือชื่ออาสาสมัคร \_\_\_\_\_ วัน-เดือน-ปี \_\_\_\_\_

15  
16  
17 ( \_\_\_\_\_ )

18  
19  
20 ลายมือชื่อเจ้าหน้าที่ผู้ให้ข้อมูล \_\_\_\_\_ วัน-เดือน-ปี \_\_\_\_\_

21  
22 ณ สถานพยาบาล

23  
24 ( \_\_\_\_\_ )

25  
26 พยาน \_\_\_\_\_ วัน-เดือน-ปี \_\_\_\_\_

27  
28  
29 ( \_\_\_\_\_ )



SPIRIT 2013 Checklist: Recommended items to address in a clinical trial protocol and related documents\*

| Section/item                      | ItemNo | Description                                                                                                                                                                                                                                                                              | Page/Line number         |
|-----------------------------------|--------|------------------------------------------------------------------------------------------------------------------------------------------------------------------------------------------------------------------------------------------------------------------------------------------|--------------------------|
| <b>Administrative information</b> |        |                                                                                                                                                                                                                                                                                          |                          |
| Title                             | 1      | Descriptive title identifying the study design, population, interventions, and, if applicable, trial acronym                                                                                                                                                                             | 1                        |
| Trial registration                | 2a     | Trial identifier and registry name. If not yet registered, name of intended registry                                                                                                                                                                                                     | Line 357                 |
|                                   | 2b     | All items from the World Health Organization Trial Registration Data Set                                                                                                                                                                                                                 | -                        |
| Protocol version                  | 3      | Date and version identifier                                                                                                                                                                                                                                                              | Lines 357-358            |
| Funding                           | 4      | Sources and types of financial, material, and other support                                                                                                                                                                                                                              | Lines 344-346            |
| Roles and responsibilities        | 5a     | Names, affiliations, and roles of protocol contributors                                                                                                                                                                                                                                  | Page 1 and Lines 338-342 |
|                                   | 5b     | Name and contact information for the trial sponsor                                                                                                                                                                                                                                       | Lines 359-360            |
|                                   | 5c     | Role of study sponsor and funders, if any, in study design; collection, management, analysis, and interpretation of data; writing of the report; and the decision to submit the report for publication, including whether they will have ultimate authority over any of these activities | Lines 344-353            |

|                                                           |    |                                                                                                                                                                                                                                                                  |                      |
|-----------------------------------------------------------|----|------------------------------------------------------------------------------------------------------------------------------------------------------------------------------------------------------------------------------------------------------------------|----------------------|
|                                                           | 5d | Composition, roles, and responsibilities of the coordinating centre, steering committee, endpoint adjudication committee, data management team, and other individuals or groups overseeing the trial, if applicable (see Item 21a for data monitoring committee) | Lines 322-326        |
| <b>Introduction</b>                                       |    |                                                                                                                                                                                                                                                                  |                      |
| Background and rationale                                  | 6a | Description of research question and justification for undertaking the trial, including summary of relevant studies (published and unpublished) examining benefits and harms for each intervention                                                               | Page 4 and 5         |
|                                                           | 6b | Explanation for choice of comparators                                                                                                                                                                                                                            | Lines 99-103         |
| Objectives                                                | 7  | Specific objectives or hypotheses                                                                                                                                                                                                                                | Lines 92-94, 217-226 |
| Trial design                                              | 8  | Description of trial design including type of trial (eg, parallel group, crossover, factorial, single group), allocation ratio, and framework (eg, superiority, equivalence, noninferiority, exploratory)                                                        | Lines 98-103         |
| <b>Methods: Participants, interventions, and outcomes</b> |    |                                                                                                                                                                                                                                                                  |                      |
| Study setting                                             | 9  | Description of study settings (eg, community clinic, academic hospital) and list of countries where data will be collected. Reference to where list of study sites can be obtained                                                                               | Lines 105-117        |
| Eligibility criteria                                      | 10 | Inclusion and exclusion criteria for participants. If applicable, eligibility criteria for study centres and individuals who will perform the interventions (eg, surgeons, psychotherapists)                                                                     | Lines 119-129        |

|                      |     |                                                                                                                                                                                                                                                                                                                                                                                |               |
|----------------------|-----|--------------------------------------------------------------------------------------------------------------------------------------------------------------------------------------------------------------------------------------------------------------------------------------------------------------------------------------------------------------------------------|---------------|
| Interventions        | 11a | Interventions for each group with sufficient detail to allow replication, including how and when they will be administered                                                                                                                                                                                                                                                     | Lines 157-187 |
|                      | 11b | Criteria for discontinuing or modifying allocated interventions for a given trial participant (eg, drug dose change in response to harms, participant request, or improving/worsening disease)                                                                                                                                                                                 | n/a           |
|                      | 11c | Strategies to improve adherence to intervention protocols, and any procedures for monitoring adherence (eg, drug tablet return, laboratory tests)                                                                                                                                                                                                                              | Lines 192-197 |
|                      | 11d | Relevant concomitant care and interventions that are permitted or prohibited during the trial                                                                                                                                                                                                                                                                                  | n/a           |
| Outcomes             | 12  | Primary, secondary, and other outcomes, including the specific measurement variable (eg, systolic blood pressure), analysis metric (eg, change from baseline, final value, time to event), method of aggregation (eg, median, proportion), and time point for each outcome. Explanation of the clinical relevance of chosen efficacy and harm outcomes is strongly recommended | Lines 217-229 |
| Participant timeline | 13  | Time schedule of enrolment, interventions (including any run-ins and washouts), assessments, and visits for participants. A schematic diagram is highly recommended (see Figure)                                                                                                                                                                                               | Page 9-11     |

1  
2  
3  
4  
5  
6  
7  
8  
9  
10  
11  
12  
13  
14  
15  
16  
17  
18  
19  
20  
21  
22  
23  
24  
25  
26  
27  
28  
29  
30  
31  
32  
33  
34  
35  
36  
37  
38  
39  
40  
41  
42  
43  
44  
45  
46

|                                                                     |     |                                                                                                                                                                                                                                                                                                                                                          |               |
|---------------------------------------------------------------------|-----|----------------------------------------------------------------------------------------------------------------------------------------------------------------------------------------------------------------------------------------------------------------------------------------------------------------------------------------------------------|---------------|
| Sample size                                                         | 14  | Estimated number of participants needed to achieve study objectives and how it was determined, including clinical and statistical assumptions supporting any sample size calculations                                                                                                                                                                    | Lines 140-148 |
| Recruitment                                                         | 15  | Strategies for achieving adequate participant enrolment to reach target sample size                                                                                                                                                                                                                                                                      | n/a           |
| <b>Methods: Assignment of interventions (for controlled trials)</b> |     |                                                                                                                                                                                                                                                                                                                                                          |               |
| Allocation:                                                         |     |                                                                                                                                                                                                                                                                                                                                                          |               |
| Sequence generation                                                 | 16a | Method of generating the allocation sequence (eg, computer-generated random numbers), and list of any factors for stratification. To reduce predictability of a random sequence, details of any planned restriction (eg, blocking) should be provided in a separate document that is unavailable to those who enrol participants or assign interventions | Lines 131-138 |
| Allocation concealment mechanism                                    | 16b | Mechanism of implementing the allocation sequence (eg, central telephone; sequentially numbered, opaque, sealed envelopes), describing any steps to conceal the sequence until interventions are assigned                                                                                                                                                | n/a           |
| Implementation                                                      | 16c | Who will generate the allocation sequence, who will enrol participants, and who will assign participants to interventions                                                                                                                                                                                                                                | n/a           |
| Blinding (masking)                                                  | 17a | Who will be blinded after assignment to interventions (eg, trial participants, care providers, outcome assessors, data analysts), and how                                                                                                                                                                                                                | n/a           |

|                                                           |     |                                                                                                                                                                                                                                                                                                                                                                                                              |                   |
|-----------------------------------------------------------|-----|--------------------------------------------------------------------------------------------------------------------------------------------------------------------------------------------------------------------------------------------------------------------------------------------------------------------------------------------------------------------------------------------------------------|-------------------|
|                                                           | 17b | If blinded, circumstances under which unblinding is permissible, and procedure for revealing a participant’s allocated intervention during the trial                                                                                                                                                                                                                                                         |                   |
| <b>Methods: Data collection, management, and analysis</b> |     |                                                                                                                                                                                                                                                                                                                                                                                                              |                   |
| Data collection methods                                   | 18a | Plans for assessment and collection of outcome, baseline, and other trial data, including any related processes to promote data quality (eg, duplicate measurements, training of assessors) and a description of study instruments (eg, questionnaires, laboratory tests) along with their reliability and validity, if known. Reference to where data collection forms can be found, if not in the protocol | Lines 228 Table 2 |
|                                                           | 18b | Plans to promote participant retention and complete follow-up, including list of any outcome data to be collected for participants who discontinue or deviate from intervention protocols                                                                                                                                                                                                                    | n/a               |
| Data management                                           | 19  | Plans for data entry, coding, security, and storage, including any related processes to promote data quality (eg, double data entry; range checks for data values). Reference to where details of data management procedures can be found, if not in the protocol                                                                                                                                            | Lines 264         |
| Statistical methods                                       | 20a | Statistical methods for analysing primary and secondary outcomes. Reference to where other details of the statistical analysis plan can be found, if not in the protocol                                                                                                                                                                                                                                     | Lines 277-285     |
|                                                           | 20b | Methods for any additional analyses (eg, subgroup and adjusted analyses)                                                                                                                                                                                                                                                                                                                                     | Lines 277-285     |

1  
2  
3  
4  
5  
6  
7  
8  
9  
10  
11  
12  
13  
14  
15  
16  
17  
18  
19  
20  
21  
22  
23  
24  
25  
26  
27  
28  
29  
30  
31  
32  
33  
34  
35  
36  
37  
38  
39  
40  
41  
42  
43  
44  
45  
46

|                                 |     |                                                                                                                                                                                                                                                                                                                                       |           |
|---------------------------------|-----|---------------------------------------------------------------------------------------------------------------------------------------------------------------------------------------------------------------------------------------------------------------------------------------------------------------------------------------|-----------|
|                                 | 20c | Definition of analysis population relating to protocol non-adherence (eg, as randomised analysis), and any statistical methods to handle missing data (eg, multiple imputation)                                                                                                                                                       | n/a       |
| <b>Methods: Monitoring</b>      |     |                                                                                                                                                                                                                                                                                                                                       |           |
| Data monitoring                 | 21a | Composition of data monitoring committee (DMC); summary of its role and reporting structure; statement of whether it is independent from the sponsor and competing interests; and reference to where further details about its charter can be found, if not in the protocol. Alternatively, an explanation of why a DMC is not needed | Lines 322 |
|                                 | 21b | Description of any interim analyses and stopping guidelines, including who will have access to these interim results and make the final decision to terminate the trial                                                                                                                                                               | n/a       |
| Harms                           | 22  | Plans for collecting, assessing, reporting, and managing solicited and spontaneously reported adverse events and other unintended effects of trial interventions or trial conduct                                                                                                                                                     | n/a       |
| Auditing                        | 23  | Frequency and procedures for auditing trial conduct, if any, and whether the process will be independent from investigators and the sponsor                                                                                                                                                                                           | n/a       |
| <b>Ethics and dissemination</b> |     |                                                                                                                                                                                                                                                                                                                                       |           |
| Research ethics approval        | 24  | Plans for seeking research ethics committee/institutional review board (REC/IRB) approval                                                                                                                                                                                                                                             | Lines 364 |



|                               |     |                                                                                                                                                                                                                                  |               |
|-------------------------------|-----|----------------------------------------------------------------------------------------------------------------------------------------------------------------------------------------------------------------------------------|---------------|
| Protocol amendments           | 25  | Plans for communicating important protocol modifications (eg, changes to eligibility criteria, outcomes, analyses) to relevant parties (eg, investigators, REC/IRBs, trial participants, trial registries, journals, regulators) | Lines 319-320 |
| Consent or assent             | 26a | Who will obtain informed consent or assent from potential trial participants or authorised surrogates, and how (see Item 32)                                                                                                     | Lines 150-155 |
|                               | 26b | Additional consent provisions for collection and use of participant data and biological specimens in ancillary studies, if applicable                                                                                            | n/a           |
| Confidentiality               | 27  | How personal information about potential and enrolled participants will be collected, shared, and maintained in order to protect confidentiality before, during, and after the trial                                             | Lines 150-155 |
| Declaration of interests      | 28  | Financial and other competing interests for principal investigators for the overall trial and each study site                                                                                                                    | Lines 362-363 |
| Access to data                | 29  | Statement of who will have access to the final trial dataset, and disclosure of contractual agreements that limit such access for investigators                                                                                  | Lines 348-349 |
| Ancillary and post-trial care | 30  | Provisions, if any, for ancillary and post-trial care, and for compensation to those who suffer harm from trial participation                                                                                                    | n/a           |

|                            |     |                                                                                                                                                                                                                                                                                     |               |
|----------------------------|-----|-------------------------------------------------------------------------------------------------------------------------------------------------------------------------------------------------------------------------------------------------------------------------------------|---------------|
| Dissemination policy       | 31a | Plans for investigators and sponsor to communicate trial results to participants, healthcare professionals, the public, and other relevant groups (eg, via publication, reporting in results databases, or other data sharing arrangements), including any publication restrictions | Lines 328-336 |
|                            | 31b | Authorship eligibility guidelines and any intended use of professional writers                                                                                                                                                                                                      | n/a           |
|                            | 31c | Plans, if any, for granting public access to the full protocol, participant-level dataset, and statistical code                                                                                                                                                                     | n/a           |
| <b>Appendices</b>          |     |                                                                                                                                                                                                                                                                                     |               |
| Informed consent materials | 32  | Model consent form and other related documentation given to participants and authorised surrogates                                                                                                                                                                                  | Attached      |
| Biological specimens       | 33  | Plans for collection, laboratory evaluation, and storage of biological specimens for genetic or molecular analysis in the current trial and for future use in ancillary studies, if applicable                                                                                      | n/a           |

\*It is strongly recommended that this checklist be read in conjunction with the SPIRIT 2013 Explanation & Elaboration for important clarification on the items. Amendments to the protocol should be tracked and dated. The SPIRIT checklist is copyrighted by the SPIRIT Group under the Creative Commons "[Attribution-NonCommercial-NoDerivs 3.0 Unported](https://creativecommons.org/licenses/by-nc-nd/3.0/)" license.
